# Supplementary material for: Artificial Intelligence Bias in Health Care: Web-Based Survey
Source: PubMed Central journal article supplement (PMC10337406; doi:10.2196/41089), 2023-06-22
Supplement: jmir_v25i1e41089_app1.pdf [file jmir_v25i1e41089_app1.pdf]

[^ Collapse all instruments](#)

| #                                                                                                                        | Variable / Field Name                                      | Field Label<br><i>Field Note</i>                            | Field Attributes (Field Type, Validation, Choices, Calculations, etc.)                                                                                                                                                                                                                                                                                    |   |            |   |            |   |                                        |   |                          |   |                        |   |              |
|--------------------------------------------------------------------------------------------------------------------------|------------------------------------------------------------|-------------------------------------------------------------|-----------------------------------------------------------------------------------------------------------------------------------------------------------------------------------------------------------------------------------------------------------------------------------------------------------------------------------------------------------|---|------------|---|------------|---|----------------------------------------|---|--------------------------|---|------------------------|---|--------------|
| Instrument: <b>Sprachauswahl</b> (sprachauswahl)  Enabled as survey <a href="#">^ Collapse</a>                           |                                                            |                                                             |                                                                                                                                                                                                                                                                                                                                                           |   |            |   |            |   |                                        |   |                          |   |                        |   |              |
| 1                                                                                                                        | id                                                         | ID                                                          | text<br>Field Annotation: @HIDDEN                                                                                                                                                                                                                                                                                                                         |   |            |   |            |   |                                        |   |                          |   |                        |   |              |
| 2                                                                                                                        | language                                                   | Bitte wählen Sie Ihre Sprache/ Please choose your language: | radio, Required<br><table border="1"> <tr><td>1</td><td>Deutsch</td></tr> <tr><td>2</td><td>English</td></tr> </table>                                                                                                                                                                                                                                    | 1 | Deutsch    | 2 | English    |   |                                        |   |                          |   |                        |   |              |
| 1                                                                                                                        | Deutsch                                                    |                                                             |                                                                                                                                                                                                                                                                                                                                                           |   |            |   |            |   |                                        |   |                          |   |                        |   |              |
| 2                                                                                                                        | English                                                    |                                                             |                                                                                                                                                                                                                                                                                                                                                           |   |            |   |            |   |                                        |   |                          |   |                        |   |              |
| 3                                                                                                                        | sprachauswahl_complete                                     | Section Header: <i>Form Status</i><br>Complete?             | dropdown<br><table border="1"> <tr><td>0</td><td>Incomplete</td></tr> <tr><td>1</td><td>Unverified</td></tr> <tr><td>2</td><td>Complete</td></tr> </table>                                                                                                                                                                                                | 0 | Incomplete | 1 | Unverified | 2 | Complete                               |   |                          |   |                        |   |              |
| 0                                                                                                                        | Incomplete                                                 |                                                             |                                                                                                                                                                                                                                                                                                                                                           |   |            |   |            |   |                                        |   |                          |   |                        |   |              |
| 1                                                                                                                        | Unverified                                                 |                                                             |                                                                                                                                                                                                                                                                                                                                                           |   |            |   |            |   |                                        |   |                          |   |                        |   |              |
| 2                                                                                                                        | Complete                                                   |                                                             |                                                                                                                                                                                                                                                                                                                                                           |   |            |   |            |   |                                        |   |                          |   |                        |   |              |
| Instrument: <b>Fragebogen Fairness Und Ki</b> (fragebogen_fairness_und_ki)  Enabled as survey <a href="#">^ Collapse</a> |                                                            |                                                             |                                                                                                                                                                                                                                                                                                                                                           |   |            |   |            |   |                                        |   |                          |   |                        |   |              |
| 4                                                                                                                        | quelle                                                     | Wie sind Sie auf diesen Fragebogen aufmerksam geworden?     | radio<br><table border="1"> <tr><td>1</td><td>Twitter</td></tr> <tr><td>2</td><td>Linkedin</td></tr> <tr><td>3</td><td>Emailverteiler der eigenen Einrichtung</td></tr> <tr><td>4</td><td>Persönliches Anschreiben</td></tr> <tr><td>5</td><td>Andere (bitte angeben)</td></tr> <tr><td>6</td><td>Keine Angabe</td></tr> </table><br>Custom alignment: LV | 1 | Twitter    | 2 | Linkedin   | 3 | Emailverteiler der eigenen Einrichtung | 4 | Persönliches Anschreiben | 5 | Andere (bitte angeben) | 6 | Keine Angabe |
| 1                                                                                                                        | Twitter                                                    |                                                             |                                                                                                                                                                                                                                                                                                                                                           |   |            |   |            |   |                                        |   |                          |   |                        |   |              |
| 2                                                                                                                        | Linkedin                                                   |                                                             |                                                                                                                                                                                                                                                                                                                                                           |   |            |   |            |   |                                        |   |                          |   |                        |   |              |
| 3                                                                                                                        | Emailverteiler der eigenen Einrichtung                     |                                                             |                                                                                                                                                                                                                                                                                                                                                           |   |            |   |            |   |                                        |   |                          |   |                        |   |              |
| 4                                                                                                                        | Persönliches Anschreiben                                   |                                                             |                                                                                                                                                                                                                                                                                                                                                           |   |            |   |            |   |                                        |   |                          |   |                        |   |              |
| 5                                                                                                                        | Andere (bitte angeben)                                     |                                                             |                                                                                                                                                                                                                                                                                                                                                           |   |            |   |            |   |                                        |   |                          |   |                        |   |              |
| 6                                                                                                                        | Keine Angabe                                               |                                                             |                                                                                                                                                                                                                                                                                                                                                           |   |            |   |            |   |                                        |   |                          |   |                        |   |              |
| 5                                                                                                                        | quelle_andere<br>Show the field ONLY if:<br>[quelle] = '5' | Wie sind Sie auf diesen Fragebogen aufmerksam geworden:     | text                                                                                                                                                                                                                                                                                                                                                      |   |            |   |            |   |                                        |   |                          |   |                        |   |              |

|    |                                                                       |                                            |                                                                                                                                                                                                                                                                                                                                                                                                                                                                                                                                                                                                                                                                                                                                                                                                                                                                                                                                                                                                                                                                                                                                                                                                         |   |              |   |                     |   |            |   |                        |   |              |   |             |   |          |   |        |   |              |    |          |    |         |    |          |    |            |    |          |    |         |    |          |    |         |    |       |    |       |    |          |    |           |    |            |    |        |    |        |    |           |    |          |    |          |    |                              |    |              |
|----|-----------------------------------------------------------------------|--------------------------------------------|---------------------------------------------------------------------------------------------------------------------------------------------------------------------------------------------------------------------------------------------------------------------------------------------------------------------------------------------------------------------------------------------------------------------------------------------------------------------------------------------------------------------------------------------------------------------------------------------------------------------------------------------------------------------------------------------------------------------------------------------------------------------------------------------------------------------------------------------------------------------------------------------------------------------------------------------------------------------------------------------------------------------------------------------------------------------------------------------------------------------------------------------------------------------------------------------------------|---|--------------|---|---------------------|---|------------|---|------------------------|---|--------------|---|-------------|---|----------|---|--------|---|--------------|----|----------|----|---------|----|----------|----|------------|----|----------|----|---------|----|----------|----|---------|----|-------|----|-------|----|----------|----|-----------|----|------------|----|--------|----|--------|----|-----------|----|----------|----|----------|----|------------------------------|----|--------------|
| 6  | arbeitsland                                                           | In welchem Land arbeiten Sie?              | dropdown<br><table border="1"> <tr><td>1</td><td>Belgien</td></tr> <tr><td>2</td><td>Deutschland</td></tr> <tr><td>3</td><td>Frankreich</td></tr> <tr><td>4</td><td>Italien</td></tr> <tr><td>5</td><td>Luxembourg</td></tr> <tr><td>6</td><td>Niederlande</td></tr> <tr><td>7</td><td>Dänemark</td></tr> <tr><td>8</td><td>Irland</td></tr> <tr><td>9</td><td>Griechenland</td></tr> <tr><td>10</td><td>Portugal</td></tr> <tr><td>11</td><td>Spanien</td></tr> <tr><td>12</td><td>Finnland</td></tr> <tr><td>13</td><td>Österreich</td></tr> <tr><td>14</td><td>Schweden</td></tr> <tr><td>15</td><td>Estland</td></tr> <tr><td>16</td><td>Lettland</td></tr> <tr><td>17</td><td>Litauen</td></tr> <tr><td>18</td><td>Malta</td></tr> <tr><td>19</td><td>Polen</td></tr> <tr><td>20</td><td>Slowakei</td></tr> <tr><td>21</td><td>Slowenien</td></tr> <tr><td>22</td><td>Tschechien</td></tr> <tr><td>23</td><td>Ungarn</td></tr> <tr><td>24</td><td>Zypern</td></tr> <tr><td>25</td><td>Bulgarien</td></tr> <tr><td>26</td><td>Rumänien</td></tr> <tr><td>27</td><td>Kroatien</td></tr> <tr><td>28</td><td>Anderes Land (bitte angeben)</td></tr> <tr><td>29</td><td>Keine Angabe</td></tr> </table> | 1 | Belgien      | 2 | Deutschland         | 3 | Frankreich | 4 | Italien                | 5 | Luxembourg   | 6 | Niederlande | 7 | Dänemark | 8 | Irland | 9 | Griechenland | 10 | Portugal | 11 | Spanien | 12 | Finnland | 13 | Österreich | 14 | Schweden | 15 | Estland | 16 | Lettland | 17 | Litauen | 18 | Malta | 19 | Polen | 20 | Slowakei | 21 | Slowenien | 22 | Tschechien | 23 | Ungarn | 24 | Zypern | 25 | Bulgarien | 26 | Rumänien | 27 | Kroatien | 28 | Anderes Land (bitte angeben) | 29 | Keine Angabe |
| 1  | Belgien                                                               |                                            |                                                                                                                                                                                                                                                                                                                                                                                                                                                                                                                                                                                                                                                                                                                                                                                                                                                                                                                                                                                                                                                                                                                                                                                                         |   |              |   |                     |   |            |   |                        |   |              |   |             |   |          |   |        |   |              |    |          |    |         |    |          |    |            |    |          |    |         |    |          |    |         |    |       |    |       |    |          |    |           |    |            |    |        |    |        |    |           |    |          |    |          |    |                              |    |              |
| 2  | Deutschland                                                           |                                            |                                                                                                                                                                                                                                                                                                                                                                                                                                                                                                                                                                                                                                                                                                                                                                                                                                                                                                                                                                                                                                                                                                                                                                                                         |   |              |   |                     |   |            |   |                        |   |              |   |             |   |          |   |        |   |              |    |          |    |         |    |          |    |            |    |          |    |         |    |          |    |         |    |       |    |       |    |          |    |           |    |            |    |        |    |        |    |           |    |          |    |          |    |                              |    |              |
| 3  | Frankreich                                                            |                                            |                                                                                                                                                                                                                                                                                                                                                                                                                                                                                                                                                                                                                                                                                                                                                                                                                                                                                                                                                                                                                                                                                                                                                                                                         |   |              |   |                     |   |            |   |                        |   |              |   |             |   |          |   |        |   |              |    |          |    |         |    |          |    |            |    |          |    |         |    |          |    |         |    |       |    |       |    |          |    |           |    |            |    |        |    |        |    |           |    |          |    |          |    |                              |    |              |
| 4  | Italien                                                               |                                            |                                                                                                                                                                                                                                                                                                                                                                                                                                                                                                                                                                                                                                                                                                                                                                                                                                                                                                                                                                                                                                                                                                                                                                                                         |   |              |   |                     |   |            |   |                        |   |              |   |             |   |          |   |        |   |              |    |          |    |         |    |          |    |            |    |          |    |         |    |          |    |         |    |       |    |       |    |          |    |           |    |            |    |        |    |        |    |           |    |          |    |          |    |                              |    |              |
| 5  | Luxembourg                                                            |                                            |                                                                                                                                                                                                                                                                                                                                                                                                                                                                                                                                                                                                                                                                                                                                                                                                                                                                                                                                                                                                                                                                                                                                                                                                         |   |              |   |                     |   |            |   |                        |   |              |   |             |   |          |   |        |   |              |    |          |    |         |    |          |    |            |    |          |    |         |    |          |    |         |    |       |    |       |    |          |    |           |    |            |    |        |    |        |    |           |    |          |    |          |    |                              |    |              |
| 6  | Niederlande                                                           |                                            |                                                                                                                                                                                                                                                                                                                                                                                                                                                                                                                                                                                                                                                                                                                                                                                                                                                                                                                                                                                                                                                                                                                                                                                                         |   |              |   |                     |   |            |   |                        |   |              |   |             |   |          |   |        |   |              |    |          |    |         |    |          |    |            |    |          |    |         |    |          |    |         |    |       |    |       |    |          |    |           |    |            |    |        |    |        |    |           |    |          |    |          |    |                              |    |              |
| 7  | Dänemark                                                              |                                            |                                                                                                                                                                                                                                                                                                                                                                                                                                                                                                                                                                                                                                                                                                                                                                                                                                                                                                                                                                                                                                                                                                                                                                                                         |   |              |   |                     |   |            |   |                        |   |              |   |             |   |          |   |        |   |              |    |          |    |         |    |          |    |            |    |          |    |         |    |          |    |         |    |       |    |       |    |          |    |           |    |            |    |        |    |        |    |           |    |          |    |          |    |                              |    |              |
| 8  | Irland                                                                |                                            |                                                                                                                                                                                                                                                                                                                                                                                                                                                                                                                                                                                                                                                                                                                                                                                                                                                                                                                                                                                                                                                                                                                                                                                                         |   |              |   |                     |   |            |   |                        |   |              |   |             |   |          |   |        |   |              |    |          |    |         |    |          |    |            |    |          |    |         |    |          |    |         |    |       |    |       |    |          |    |           |    |            |    |        |    |        |    |           |    |          |    |          |    |                              |    |              |
| 9  | Griechenland                                                          |                                            |                                                                                                                                                                                                                                                                                                                                                                                                                                                                                                                                                                                                                                                                                                                                                                                                                                                                                                                                                                                                                                                                                                                                                                                                         |   |              |   |                     |   |            |   |                        |   |              |   |             |   |          |   |        |   |              |    |          |    |         |    |          |    |            |    |          |    |         |    |          |    |         |    |       |    |       |    |          |    |           |    |            |    |        |    |        |    |           |    |          |    |          |    |                              |    |              |
| 10 | Portugal                                                              |                                            |                                                                                                                                                                                                                                                                                                                                                                                                                                                                                                                                                                                                                                                                                                                                                                                                                                                                                                                                                                                                                                                                                                                                                                                                         |   |              |   |                     |   |            |   |                        |   |              |   |             |   |          |   |        |   |              |    |          |    |         |    |          |    |            |    |          |    |         |    |          |    |         |    |       |    |       |    |          |    |           |    |            |    |        |    |        |    |           |    |          |    |          |    |                              |    |              |
| 11 | Spanien                                                               |                                            |                                                                                                                                                                                                                                                                                                                                                                                                                                                                                                                                                                                                                                                                                                                                                                                                                                                                                                                                                                                                                                                                                                                                                                                                         |   |              |   |                     |   |            |   |                        |   |              |   |             |   |          |   |        |   |              |    |          |    |         |    |          |    |            |    |          |    |         |    |          |    |         |    |       |    |       |    |          |    |           |    |            |    |        |    |        |    |           |    |          |    |          |    |                              |    |              |
| 12 | Finnland                                                              |                                            |                                                                                                                                                                                                                                                                                                                                                                                                                                                                                                                                                                                                                                                                                                                                                                                                                                                                                                                                                                                                                                                                                                                                                                                                         |   |              |   |                     |   |            |   |                        |   |              |   |             |   |          |   |        |   |              |    |          |    |         |    |          |    |            |    |          |    |         |    |          |    |         |    |       |    |       |    |          |    |           |    |            |    |        |    |        |    |           |    |          |    |          |    |                              |    |              |
| 13 | Österreich                                                            |                                            |                                                                                                                                                                                                                                                                                                                                                                                                                                                                                                                                                                                                                                                                                                                                                                                                                                                                                                                                                                                                                                                                                                                                                                                                         |   |              |   |                     |   |            |   |                        |   |              |   |             |   |          |   |        |   |              |    |          |    |         |    |          |    |            |    |          |    |         |    |          |    |         |    |       |    |       |    |          |    |           |    |            |    |        |    |        |    |           |    |          |    |          |    |                              |    |              |
| 14 | Schweden                                                              |                                            |                                                                                                                                                                                                                                                                                                                                                                                                                                                                                                                                                                                                                                                                                                                                                                                                                                                                                                                                                                                                                                                                                                                                                                                                         |   |              |   |                     |   |            |   |                        |   |              |   |             |   |          |   |        |   |              |    |          |    |         |    |          |    |            |    |          |    |         |    |          |    |         |    |       |    |       |    |          |    |           |    |            |    |        |    |        |    |           |    |          |    |          |    |                              |    |              |
| 15 | Estland                                                               |                                            |                                                                                                                                                                                                                                                                                                                                                                                                                                                                                                                                                                                                                                                                                                                                                                                                                                                                                                                                                                                                                                                                                                                                                                                                         |   |              |   |                     |   |            |   |                        |   |              |   |             |   |          |   |        |   |              |    |          |    |         |    |          |    |            |    |          |    |         |    |          |    |         |    |       |    |       |    |          |    |           |    |            |    |        |    |        |    |           |    |          |    |          |    |                              |    |              |
| 16 | Lettland                                                              |                                            |                                                                                                                                                                                                                                                                                                                                                                                                                                                                                                                                                                                                                                                                                                                                                                                                                                                                                                                                                                                                                                                                                                                                                                                                         |   |              |   |                     |   |            |   |                        |   |              |   |             |   |          |   |        |   |              |    |          |    |         |    |          |    |            |    |          |    |         |    |          |    |         |    |       |    |       |    |          |    |           |    |            |    |        |    |        |    |           |    |          |    |          |    |                              |    |              |
| 17 | Litauen                                                               |                                            |                                                                                                                                                                                                                                                                                                                                                                                                                                                                                                                                                                                                                                                                                                                                                                                                                                                                                                                                                                                                                                                                                                                                                                                                         |   |              |   |                     |   |            |   |                        |   |              |   |             |   |          |   |        |   |              |    |          |    |         |    |          |    |            |    |          |    |         |    |          |    |         |    |       |    |       |    |          |    |           |    |            |    |        |    |        |    |           |    |          |    |          |    |                              |    |              |
| 18 | Malta                                                                 |                                            |                                                                                                                                                                                                                                                                                                                                                                                                                                                                                                                                                                                                                                                                                                                                                                                                                                                                                                                                                                                                                                                                                                                                                                                                         |   |              |   |                     |   |            |   |                        |   |              |   |             |   |          |   |        |   |              |    |          |    |         |    |          |    |            |    |          |    |         |    |          |    |         |    |       |    |       |    |          |    |           |    |            |    |        |    |        |    |           |    |          |    |          |    |                              |    |              |
| 19 | Polen                                                                 |                                            |                                                                                                                                                                                                                                                                                                                                                                                                                                                                                                                                                                                                                                                                                                                                                                                                                                                                                                                                                                                                                                                                                                                                                                                                         |   |              |   |                     |   |            |   |                        |   |              |   |             |   |          |   |        |   |              |    |          |    |         |    |          |    |            |    |          |    |         |    |          |    |         |    |       |    |       |    |          |    |           |    |            |    |        |    |        |    |           |    |          |    |          |    |                              |    |              |
| 20 | Slowakei                                                              |                                            |                                                                                                                                                                                                                                                                                                                                                                                                                                                                                                                                                                                                                                                                                                                                                                                                                                                                                                                                                                                                                                                                                                                                                                                                         |   |              |   |                     |   |            |   |                        |   |              |   |             |   |          |   |        |   |              |    |          |    |         |    |          |    |            |    |          |    |         |    |          |    |         |    |       |    |       |    |          |    |           |    |            |    |        |    |        |    |           |    |          |    |          |    |                              |    |              |
| 21 | Slowenien                                                             |                                            |                                                                                                                                                                                                                                                                                                                                                                                                                                                                                                                                                                                                                                                                                                                                                                                                                                                                                                                                                                                                                                                                                                                                                                                                         |   |              |   |                     |   |            |   |                        |   |              |   |             |   |          |   |        |   |              |    |          |    |         |    |          |    |            |    |          |    |         |    |          |    |         |    |       |    |       |    |          |    |           |    |            |    |        |    |        |    |           |    |          |    |          |    |                              |    |              |
| 22 | Tschechien                                                            |                                            |                                                                                                                                                                                                                                                                                                                                                                                                                                                                                                                                                                                                                                                                                                                                                                                                                                                                                                                                                                                                                                                                                                                                                                                                         |   |              |   |                     |   |            |   |                        |   |              |   |             |   |          |   |        |   |              |    |          |    |         |    |          |    |            |    |          |    |         |    |          |    |         |    |       |    |       |    |          |    |           |    |            |    |        |    |        |    |           |    |          |    |          |    |                              |    |              |
| 23 | Ungarn                                                                |                                            |                                                                                                                                                                                                                                                                                                                                                                                                                                                                                                                                                                                                                                                                                                                                                                                                                                                                                                                                                                                                                                                                                                                                                                                                         |   |              |   |                     |   |            |   |                        |   |              |   |             |   |          |   |        |   |              |    |          |    |         |    |          |    |            |    |          |    |         |    |          |    |         |    |       |    |       |    |          |    |           |    |            |    |        |    |        |    |           |    |          |    |          |    |                              |    |              |
| 24 | Zypern                                                                |                                            |                                                                                                                                                                                                                                                                                                                                                                                                                                                                                                                                                                                                                                                                                                                                                                                                                                                                                                                                                                                                                                                                                                                                                                                                         |   |              |   |                     |   |            |   |                        |   |              |   |             |   |          |   |        |   |              |    |          |    |         |    |          |    |            |    |          |    |         |    |          |    |         |    |       |    |       |    |          |    |           |    |            |    |        |    |        |    |           |    |          |    |          |    |                              |    |              |
| 25 | Bulgarien                                                             |                                            |                                                                                                                                                                                                                                                                                                                                                                                                                                                                                                                                                                                                                                                                                                                                                                                                                                                                                                                                                                                                                                                                                                                                                                                                         |   |              |   |                     |   |            |   |                        |   |              |   |             |   |          |   |        |   |              |    |          |    |         |    |          |    |            |    |          |    |         |    |          |    |         |    |       |    |       |    |          |    |           |    |            |    |        |    |        |    |           |    |          |    |          |    |                              |    |              |
| 26 | Rumänien                                                              |                                            |                                                                                                                                                                                                                                                                                                                                                                                                                                                                                                                                                                                                                                                                                                                                                                                                                                                                                                                                                                                                                                                                                                                                                                                                         |   |              |   |                     |   |            |   |                        |   |              |   |             |   |          |   |        |   |              |    |          |    |         |    |          |    |            |    |          |    |         |    |          |    |         |    |       |    |       |    |          |    |           |    |            |    |        |    |        |    |           |    |          |    |          |    |                              |    |              |
| 27 | Kroatien                                                              |                                            |                                                                                                                                                                                                                                                                                                                                                                                                                                                                                                                                                                                                                                                                                                                                                                                                                                                                                                                                                                                                                                                                                                                                                                                                         |   |              |   |                     |   |            |   |                        |   |              |   |             |   |          |   |        |   |              |    |          |    |         |    |          |    |            |    |          |    |         |    |          |    |         |    |       |    |       |    |          |    |           |    |            |    |        |    |        |    |           |    |          |    |          |    |                              |    |              |
| 28 | Anderes Land (bitte angeben)                                          |                                            |                                                                                                                                                                                                                                                                                                                                                                                                                                                                                                                                                                                                                                                                                                                                                                                                                                                                                                                                                                                                                                                                                                                                                                                                         |   |              |   |                     |   |            |   |                        |   |              |   |             |   |          |   |        |   |              |    |          |    |         |    |          |    |            |    |          |    |         |    |          |    |         |    |       |    |       |    |          |    |           |    |            |    |        |    |        |    |           |    |          |    |          |    |                              |    |              |
| 29 | Keine Angabe                                                          |                                            |                                                                                                                                                                                                                                                                                                                                                                                                                                                                                                                                                                                                                                                                                                                                                                                                                                                                                                                                                                                                                                                                                                                                                                                                         |   |              |   |                     |   |            |   |                        |   |              |   |             |   |          |   |        |   |              |    |          |    |         |    |          |    |            |    |          |    |         |    |          |    |         |    |       |    |       |    |          |    |           |    |            |    |        |    |        |    |           |    |          |    |          |    |                              |    |              |
| 7  | arbeitsland_andere<br>Show the field ONLY if:<br>[arbeitsland] = '28' | In welchem anderen Land arbeiten Sie:      | text                                                                                                                                                                                                                                                                                                                                                                                                                                                                                                                                                                                                                                                                                                                                                                                                                                                                                                                                                                                                                                                                                                                                                                                                    |   |              |   |                     |   |            |   |                        |   |              |   |             |   |          |   |        |   |              |    |          |    |         |    |          |    |            |    |          |    |         |    |          |    |         |    |       |    |       |    |          |    |           |    |            |    |        |    |        |    |           |    |          |    |          |    |                              |    |              |
| 8  | arbeitgeber                                                           | In welcher Firma/Institution arbeiten Sie? | text                                                                                                                                                                                                                                                                                                                                                                                                                                                                                                                                                                                                                                                                                                                                                                                                                                                                                                                                                                                                                                                                                                                                                                                                    |   |              |   |                     |   |            |   |                        |   |              |   |             |   |          |   |        |   |              |    |          |    |         |    |          |    |            |    |          |    |         |    |          |    |         |    |       |    |       |    |          |    |           |    |            |    |        |    |        |    |           |    |          |    |          |    |                              |    |              |
| 9  | geschlecht                                                            | Bitte geben Sie ihr Geschlecht an:         | radio<br><table border="1"> <tr><td>1</td><td>Weiblich</td></tr> <tr><td>2</td><td>Männlich</td></tr> <tr><td>3</td><td>Divers</td></tr> <tr><td>4</td><td>Unbestimmt</td></tr> <tr><td>5</td><td>Keine Angabe</td></tr> </table><br>Custom alignment: LH                                                                                                                                                                                                                                                                                                                                                                                                                                                                                                                                                                                                                                                                                                                                                                                                                                                                                                                                               | 1 | Weiblich     | 2 | Männlich            | 3 | Divers     | 4 | Unbestimmt             | 5 | Keine Angabe |   |             |   |          |   |        |   |              |    |          |    |         |    |          |    |            |    |          |    |         |    |          |    |         |    |       |    |       |    |          |    |           |    |            |    |        |    |        |    |           |    |          |    |          |    |                              |    |              |
| 1  | Weiblich                                                              |                                            |                                                                                                                                                                                                                                                                                                                                                                                                                                                                                                                                                                                                                                                                                                                                                                                                                                                                                                                                                                                                                                                                                                                                                                                                         |   |              |   |                     |   |            |   |                        |   |              |   |             |   |          |   |        |   |              |    |          |    |         |    |          |    |            |    |          |    |         |    |          |    |         |    |       |    |       |    |          |    |           |    |            |    |        |    |        |    |           |    |          |    |          |    |                              |    |              |
| 2  | Männlich                                                              |                                            |                                                                                                                                                                                                                                                                                                                                                                                                                                                                                                                                                                                                                                                                                                                                                                                                                                                                                                                                                                                                                                                                                                                                                                                                         |   |              |   |                     |   |            |   |                        |   |              |   |             |   |          |   |        |   |              |    |          |    |         |    |          |    |            |    |          |    |         |    |          |    |         |    |       |    |       |    |          |    |           |    |            |    |        |    |        |    |           |    |          |    |          |    |                              |    |              |
| 3  | Divers                                                                |                                            |                                                                                                                                                                                                                                                                                                                                                                                                                                                                                                                                                                                                                                                                                                                                                                                                                                                                                                                                                                                                                                                                                                                                                                                                         |   |              |   |                     |   |            |   |                        |   |              |   |             |   |          |   |        |   |              |    |          |    |         |    |          |    |            |    |          |    |         |    |          |    |         |    |       |    |       |    |          |    |           |    |            |    |        |    |        |    |           |    |          |    |          |    |                              |    |              |
| 4  | Unbestimmt                                                            |                                            |                                                                                                                                                                                                                                                                                                                                                                                                                                                                                                                                                                                                                                                                                                                                                                                                                                                                                                                                                                                                                                                                                                                                                                                                         |   |              |   |                     |   |            |   |                        |   |              |   |             |   |          |   |        |   |              |    |          |    |         |    |          |    |            |    |          |    |         |    |          |    |         |    |       |    |       |    |          |    |           |    |            |    |        |    |        |    |           |    |          |    |          |    |                              |    |              |
| 5  | Keine Angabe                                                          |                                            |                                                                                                                                                                                                                                                                                                                                                                                                                                                                                                                                                                                                                                                                                                                                                                                                                                                                                                                                                                                                                                                                                                                                                                                                         |   |              |   |                     |   |            |   |                        |   |              |   |             |   |          |   |        |   |              |    |          |    |         |    |          |    |            |    |          |    |         |    |          |    |         |    |       |    |       |    |          |    |           |    |            |    |        |    |        |    |           |    |          |    |          |    |                              |    |              |
| 10 | alter                                                                 | Wie alt sind Sie?<br><i>Jahre</i>          | text (number, Min: 15, Max: 100)                                                                                                                                                                                                                                                                                                                                                                                                                                                                                                                                                                                                                                                                                                                                                                                                                                                                                                                                                                                                                                                                                                                                                                        |   |              |   |                     |   |            |   |                        |   |              |   |             |   |          |   |        |   |              |    |          |    |         |    |          |    |            |    |          |    |         |    |          |    |         |    |       |    |       |    |          |    |           |    |            |    |        |    |        |    |           |    |          |    |          |    |                              |    |              |
| 11 | sektor                                                                | In welchem Sektor sind Sie tätig?          | radio<br><table border="1"> <tr><td>1</td><td>Wissenschaft</td></tr> <tr><td>2</td><td>Klinische Tätigkeit</td></tr> <tr><td>3</td><td>Wirtschaft</td></tr> <tr><td>4</td><td>Andere (bitte angeben)</td></tr> <tr><td>5</td><td>Keine Angabe</td></tr> </table><br>Custom alignment: LV                                                                                                                                                                                                                                                                                                                                                                                                                                                                                                                                                                                                                                                                                                                                                                                                                                                                                                                | 1 | Wissenschaft | 2 | Klinische Tätigkeit | 3 | Wirtschaft | 4 | Andere (bitte angeben) | 5 | Keine Angabe |   |             |   |          |   |        |   |              |    |          |    |         |    |          |    |            |    |          |    |         |    |          |    |         |    |       |    |       |    |          |    |           |    |            |    |        |    |        |    |           |    |          |    |          |    |                              |    |              |
| 1  | Wissenschaft                                                          |                                            |                                                                                                                                                                                                                                                                                                                                                                                                                                                                                                                                                                                                                                                                                                                                                                                                                                                                                                                                                                                                                                                                                                                                                                                                         |   |              |   |                     |   |            |   |                        |   |              |   |             |   |          |   |        |   |              |    |          |    |         |    |          |    |            |    |          |    |         |    |          |    |         |    |       |    |       |    |          |    |           |    |            |    |        |    |        |    |           |    |          |    |          |    |                              |    |              |
| 2  | Klinische Tätigkeit                                                   |                                            |                                                                                                                                                                                                                                                                                                                                                                                                                                                                                                                                                                                                                                                                                                                                                                                                                                                                                                                                                                                                                                                                                                                                                                                                         |   |              |   |                     |   |            |   |                        |   |              |   |             |   |          |   |        |   |              |    |          |    |         |    |          |    |            |    |          |    |         |    |          |    |         |    |       |    |       |    |          |    |           |    |            |    |        |    |        |    |           |    |          |    |          |    |                              |    |              |
| 3  | Wirtschaft                                                            |                                            |                                                                                                                                                                                                                                                                                                                                                                                                                                                                                                                                                                                                                                                                                                                                                                                                                                                                                                                                                                                                                                                                                                                                                                                                         |   |              |   |                     |   |            |   |                        |   |              |   |             |   |          |   |        |   |              |    |          |    |         |    |          |    |            |    |          |    |         |    |          |    |         |    |       |    |       |    |          |    |           |    |            |    |        |    |        |    |           |    |          |    |          |    |                              |    |              |
| 4  | Andere (bitte angeben)                                                |                                            |                                                                                                                                                                                                                                                                                                                                                                                                                                                                                                                                                                                                                                                                                                                                                                                                                                                                                                                                                                                                                                                                                                                                                                                                         |   |              |   |                     |   |            |   |                        |   |              |   |             |   |          |   |        |   |              |    |          |    |         |    |          |    |            |    |          |    |         |    |          |    |         |    |       |    |       |    |          |    |           |    |            |    |        |    |        |    |           |    |          |    |          |    |                              |    |              |
| 5  | Keine Angabe                                                          |                                            |                                                                                                                                                                                                                                                                                                                                                                                                                                                                                                                                                                                                                                                                                                                                                                                                                                                                                                                                                                                                                                                                                                                                                                                                         |   |              |   |                     |   |            |   |                        |   |              |   |             |   |          |   |        |   |              |    |          |    |         |    |          |    |            |    |          |    |         |    |          |    |         |    |       |    |       |    |          |    |           |    |            |    |        |    |        |    |           |    |          |    |          |    |                              |    |              |
| 12 | sektor_andere<br>Show the field ONLY if:<br>[sektor] = '4'            | In welchem anderen Sektor sind Sie tätig:  | text                                                                                                                                                                                                                                                                                                                                                                                                                                                                                                                                                                                                                                                                                                                                                                                                                                                                                                                                                                                                                                                                                                                                                                                                    |   |              |   |                     |   |            |   |                        |   |              |   |             |   |          |   |        |   |              |    |          |    |         |    |          |    |            |    |          |    |         |    |          |    |         |    |       |    |       |    |          |    |           |    |            |    |        |    |        |    |           |    |          |    |          |    |                              |    |              |

|                                                                                                                                                                                                             |                                                                                          |                                                                                          |                                                                                                                                                                                                                                                                                                                                                                                                                                                                                                                                                                                                                                                                                                                                                 |   |                         |                |                                 |                         |                              |   |                         |                 |              |                         |                                    |   |                         |                          |   |                         |                                             |   |                         |                        |   |                         |              |
|-------------------------------------------------------------------------------------------------------------------------------------------------------------------------------------------------------------|------------------------------------------------------------------------------------------|------------------------------------------------------------------------------------------|-------------------------------------------------------------------------------------------------------------------------------------------------------------------------------------------------------------------------------------------------------------------------------------------------------------------------------------------------------------------------------------------------------------------------------------------------------------------------------------------------------------------------------------------------------------------------------------------------------------------------------------------------------------------------------------------------------------------------------------------------|---|-------------------------|----------------|---------------------------------|-------------------------|------------------------------|---|-------------------------|-----------------|--------------|-------------------------|------------------------------------|---|-------------------------|--------------------------|---|-------------------------|---------------------------------------------|---|-------------------------|------------------------|---|-------------------------|--------------|
| 13                                                                                                                                                                                                          | ki_entwicklung                                                                           | Sind Sie derzeit an einer KI-Entwicklung beteiligt?                                      | radio, Required<br><table border="1"> <tr><td>1</td><td>Ja</td></tr> <tr><td>2</td><td>Nein, aber in der Vergangenheit</td></tr> <tr><td>3</td><td>Nein, aber ist in Planung</td></tr> <tr><td>4</td><td>Nein, noch nie</td></tr> <tr><td>5</td><td>Keine Angabe</td></tr> </table><br>Custom alignment: LV                                                                                                                                                                                                                                                                                                                                                                                                                                     | 1 | Ja                      | 2              | Nein, aber in der Vergangenheit | 3                       | Nein, aber ist in Planung    | 4 | Nein, noch nie          | 5               | Keine Angabe |                         |                                    |   |                         |                          |   |                         |                                             |   |                         |                        |   |                         |              |
| 1                                                                                                                                                                                                           | Ja                                                                                       |                                                                                          |                                                                                                                                                                                                                                                                                                                                                                                                                                                                                                                                                                                                                                                                                                                                                 |   |                         |                |                                 |                         |                              |   |                         |                 |              |                         |                                    |   |                         |                          |   |                         |                                             |   |                         |                        |   |                         |              |
| 2                                                                                                                                                                                                           | Nein, aber in der Vergangenheit                                                          |                                                                                          |                                                                                                                                                                                                                                                                                                                                                                                                                                                                                                                                                                                                                                                                                                                                                 |   |                         |                |                                 |                         |                              |   |                         |                 |              |                         |                                    |   |                         |                          |   |                         |                                             |   |                         |                        |   |                         |              |
| 3                                                                                                                                                                                                           | Nein, aber ist in Planung                                                                |                                                                                          |                                                                                                                                                                                                                                                                                                                                                                                                                                                                                                                                                                                                                                                                                                                                                 |   |                         |                |                                 |                         |                              |   |                         |                 |              |                         |                                    |   |                         |                          |   |                         |                                             |   |                         |                        |   |                         |              |
| 4                                                                                                                                                                                                           | Nein, noch nie                                                                           |                                                                                          |                                                                                                                                                                                                                                                                                                                                                                                                                                                                                                                                                                                                                                                                                                                                                 |   |                         |                |                                 |                         |                              |   |                         |                 |              |                         |                                    |   |                         |                          |   |                         |                                             |   |                         |                        |   |                         |              |
| 5                                                                                                                                                                                                           | Keine Angabe                                                                             |                                                                                          |                                                                                                                                                                                                                                                                                                                                                                                                                                                                                                                                                                                                                                                                                                                                                 |   |                         |                |                                 |                         |                              |   |                         |                 |              |                         |                                    |   |                         |                          |   |                         |                                             |   |                         |                        |   |                         |              |
| 14                                                                                                                                                                                                          | kommentar<br>Show the field ONLY if:<br>[ki_entwicklung] = '4' or [ki_entwicklung] = '5' | Haben Sie generelle Anmerkungen zum Fragebogen?                                          | notes                                                                                                                                                                                                                                                                                                                                                                                                                                                                                                                                                                                                                                                                                                                                           |   |                         |                |                                 |                         |                              |   |                         |                 |              |                         |                                    |   |                         |                          |   |                         |                                             |   |                         |                        |   |                         |              |
| 15                                                                                                                                                                                                          | fragebogen_fairness_und_ki_complete                                                      | Section Header: <i>Form Status</i><br>Complete?                                          | dropdown<br><table border="1"> <tr><td>0</td><td>Incomplete</td></tr> <tr><td>1</td><td>Unverified</td></tr> <tr><td>2</td><td>Complete</td></tr> </table>                                                                                                                                                                                                                                                                                                                                                                                                                                                                                                                                                                                      | 0 | Incomplete              | 1              | Unverified                      | 2                       | Complete                     |   |                         |                 |              |                         |                                    |   |                         |                          |   |                         |                                             |   |                         |                        |   |                         |              |
| 0                                                                                                                                                                                                           | Incomplete                                                                               |                                                                                          |                                                                                                                                                                                                                                                                                                                                                                                                                                                                                                                                                                                                                                                                                                                                                 |   |                         |                |                                 |                         |                              |   |                         |                 |              |                         |                                    |   |                         |                          |   |                         |                                             |   |                         |                        |   |                         |              |
| 1                                                                                                                                                                                                           | Unverified                                                                               |                                                                                          |                                                                                                                                                                                                                                                                                                                                                                                                                                                                                                                                                                                                                                                                                                                                                 |   |                         |                |                                 |                         |                              |   |                         |                 |              |                         |                                    |   |                         |                          |   |                         |                                             |   |                         |                        |   |                         |              |
| 2                                                                                                                                                                                                           | Complete                                                                                 |                                                                                          |                                                                                                                                                                                                                                                                                                                                                                                                                                                                                                                                                                                                                                                                                                                                                 |   |                         |                |                                 |                         |                              |   |                         |                 |              |                         |                                    |   |                         |                          |   |                         |                                             |   |                         |                        |   |                         |              |
| Instrument: <b>Fragebogen Fairness Und Ki 2</b> (fragebogen_fairness_und_ki_2)  Enabled as survey <a href="#">Collapse</a> |                                                                                          |                                                                                          |                                                                                                                                                                                                                                                                                                                                                                                                                                                                                                                                                                                                                                                                                                                                                 |   |                         |                |                                 |                         |                              |   |                         |                 |              |                         |                                    |   |                         |                          |   |                         |                                             |   |                         |                        |   |                         |              |
| 16                                                                                                                                                                                                          | ki_entwicklungsphase                                                                     | In welcher Phase entwickeln oder haben Sie KI-Projekte entwickelt?                       | checkbox<br><table border="1"> <tr><td>1</td><td>ki_entwicklungsphase__1</td><td>Projektplanung</td></tr> <tr><td>2</td><td>ki_entwicklungsphase__2</td><td>Datenerfassung/-aufbereitung</td></tr> <tr><td>3</td><td>ki_entwicklungsphase__3</td><td>Datenannotation</td></tr> <tr><td>4</td><td>ki_entwicklungsphase__4</td><td>Identifizierung der KI-Algorithmen</td></tr> <tr><td>5</td><td>ki_entwicklungsphase__5</td><td>Training und Optimierung</td></tr> <tr><td>6</td><td>ki_entwicklungsphase__6</td><td>Ersttesten der KI-Algorithmen in der Praxis</td></tr> <tr><td>7</td><td>ki_entwicklungsphase__7</td><td>Andere (bitte angeben)</td></tr> <tr><td>8</td><td>ki_entwicklungsphase__8</td><td>Keine Angabe</td></tr> </table> | 1 | ki_entwicklungsphase__1 | Projektplanung | 2                               | ki_entwicklungsphase__2 | Datenerfassung/-aufbereitung | 3 | ki_entwicklungsphase__3 | Datenannotation | 4            | ki_entwicklungsphase__4 | Identifizierung der KI-Algorithmen | 5 | ki_entwicklungsphase__5 | Training und Optimierung | 6 | ki_entwicklungsphase__6 | Ersttesten der KI-Algorithmen in der Praxis | 7 | ki_entwicklungsphase__7 | Andere (bitte angeben) | 8 | ki_entwicklungsphase__8 | Keine Angabe |
| 1                                                                                                                                                                                                           | ki_entwicklungsphase__1                                                                  | Projektplanung                                                                           |                                                                                                                                                                                                                                                                                                                                                                                                                                                                                                                                                                                                                                                                                                                                                 |   |                         |                |                                 |                         |                              |   |                         |                 |              |                         |                                    |   |                         |                          |   |                         |                                             |   |                         |                        |   |                         |              |
| 2                                                                                                                                                                                                           | ki_entwicklungsphase__2                                                                  | Datenerfassung/-aufbereitung                                                             |                                                                                                                                                                                                                                                                                                                                                                                                                                                                                                                                                                                                                                                                                                                                                 |   |                         |                |                                 |                         |                              |   |                         |                 |              |                         |                                    |   |                         |                          |   |                         |                                             |   |                         |                        |   |                         |              |
| 3                                                                                                                                                                                                           | ki_entwicklungsphase__3                                                                  | Datenannotation                                                                          |                                                                                                                                                                                                                                                                                                                                                                                                                                                                                                                                                                                                                                                                                                                                                 |   |                         |                |                                 |                         |                              |   |                         |                 |              |                         |                                    |   |                         |                          |   |                         |                                             |   |                         |                        |   |                         |              |
| 4                                                                                                                                                                                                           | ki_entwicklungsphase__4                                                                  | Identifizierung der KI-Algorithmen                                                       |                                                                                                                                                                                                                                                                                                                                                                                                                                                                                                                                                                                                                                                                                                                                                 |   |                         |                |                                 |                         |                              |   |                         |                 |              |                         |                                    |   |                         |                          |   |                         |                                             |   |                         |                        |   |                         |              |
| 5                                                                                                                                                                                                           | ki_entwicklungsphase__5                                                                  | Training und Optimierung                                                                 |                                                                                                                                                                                                                                                                                                                                                                                                                                                                                                                                                                                                                                                                                                                                                 |   |                         |                |                                 |                         |                              |   |                         |                 |              |                         |                                    |   |                         |                          |   |                         |                                             |   |                         |                        |   |                         |              |
| 6                                                                                                                                                                                                           | ki_entwicklungsphase__6                                                                  | Ersttesten der KI-Algorithmen in der Praxis                                              |                                                                                                                                                                                                                                                                                                                                                                                                                                                                                                                                                                                                                                                                                                                                                 |   |                         |                |                                 |                         |                              |   |                         |                 |              |                         |                                    |   |                         |                          |   |                         |                                             |   |                         |                        |   |                         |              |
| 7                                                                                                                                                                                                           | ki_entwicklungsphase__7                                                                  | Andere (bitte angeben)                                                                   |                                                                                                                                                                                                                                                                                                                                                                                                                                                                                                                                                                                                                                                                                                                                                 |   |                         |                |                                 |                         |                              |   |                         |                 |              |                         |                                    |   |                         |                          |   |                         |                                             |   |                         |                        |   |                         |              |
| 8                                                                                                                                                                                                           | ki_entwicklungsphase__8                                                                  | Keine Angabe                                                                             |                                                                                                                                                                                                                                                                                                                                                                                                                                                                                                                                                                                                                                                                                                                                                 |   |                         |                |                                 |                         |                              |   |                         |                 |              |                         |                                    |   |                         |                          |   |                         |                                             |   |                         |                        |   |                         |              |
| 17                                                                                                                                                                                                          | ki_entwicklungsphase_ander<br>Show the field ONLY if:<br>[ki_entwicklungsphase(7)] = '1' | In welcher anderen Phase der Entwicklung befinden Sie sich in einem derzeitigen Projekt: | text                                                                                                                                                                                                                                                                                                                                                                                                                                                                                                                                                                                                                                                                                                                                            |   |                         |                |                                 |                         |                              |   |                         |                 |              |                         |                                    |   |                         |                          |   |                         |                                             |   |                         |                        |   |                         |              |

|    |                                                                                  |                                                                             |                                                                                                                                                                                                                                                                                                                                                                                                                                                                                                                                                                                                                                                                                                                                                                                                                                                                                                                                                                                                                                                                                                                                                                                                                                                                                                                                                                                                                                                                                                                                                                                                                                                                                                                                                                                                                                                                                                                                                                                                                                                                                                                                                                                                                                                                                                                                                                                                                                                                                                                                                                                                                                                                                                                                                                                                                                                                                                                                                                                                                                                                  |   |                    |                  |   |                    |                 |   |                    |          |   |                    |                |   |                    |                |   |                    |           |   |                    |           |   |                    |                                  |   |                    |                           |    |                     |                                  |    |                     |              |    |                     |                           |    |                     |                |    |                     |                           |    |                     |                                                   |    |                     |                      |    |                     |                                                      |    |                     |                               |    |                     |                |    |                     |            |    |                     |                |    |                     |                               |    |                     |            |    |                     |               |    |                     |                              |    |                     |                                          |    |                     |             |    |                     |                                |    |                     |                                             |    |                     |            |    |                     |               |    |                     |                  |    |                     |                     |    |                     |          |    |                     |                                     |    |                     |                        |    |                     |              |
|----|----------------------------------------------------------------------------------|-----------------------------------------------------------------------------|------------------------------------------------------------------------------------------------------------------------------------------------------------------------------------------------------------------------------------------------------------------------------------------------------------------------------------------------------------------------------------------------------------------------------------------------------------------------------------------------------------------------------------------------------------------------------------------------------------------------------------------------------------------------------------------------------------------------------------------------------------------------------------------------------------------------------------------------------------------------------------------------------------------------------------------------------------------------------------------------------------------------------------------------------------------------------------------------------------------------------------------------------------------------------------------------------------------------------------------------------------------------------------------------------------------------------------------------------------------------------------------------------------------------------------------------------------------------------------------------------------------------------------------------------------------------------------------------------------------------------------------------------------------------------------------------------------------------------------------------------------------------------------------------------------------------------------------------------------------------------------------------------------------------------------------------------------------------------------------------------------------------------------------------------------------------------------------------------------------------------------------------------------------------------------------------------------------------------------------------------------------------------------------------------------------------------------------------------------------------------------------------------------------------------------------------------------------------------------------------------------------------------------------------------------------------------------------------------------------------------------------------------------------------------------------------------------------------------------------------------------------------------------------------------------------------------------------------------------------------------------------------------------------------------------------------------------------------------------------------------------------------------------------------------------------|---|--------------------|------------------|---|--------------------|-----------------|---|--------------------|----------|---|--------------------|----------------|---|--------------------|----------------|---|--------------------|-----------|---|--------------------|-----------|---|--------------------|----------------------------------|---|--------------------|---------------------------|----|---------------------|----------------------------------|----|---------------------|--------------|----|---------------------|---------------------------|----|---------------------|----------------|----|---------------------|---------------------------|----|---------------------|---------------------------------------------------|----|---------------------|----------------------|----|---------------------|------------------------------------------------------|----|---------------------|-------------------------------|----|---------------------|----------------|----|---------------------|------------|----|---------------------|----------------|----|---------------------|-------------------------------|----|---------------------|------------|----|---------------------|---------------|----|---------------------|------------------------------|----|---------------------|------------------------------------------|----|---------------------|-------------|----|---------------------|--------------------------------|----|---------------------|---------------------------------------------|----|---------------------|------------|----|---------------------|---------------|----|---------------------|------------------|----|---------------------|---------------------|----|---------------------|----------|----|---------------------|-------------------------------------|----|---------------------|------------------------|----|---------------------|--------------|
| 18 | med_fachbereich                                                                  | In welchem medizinischen Fachbereich entwickeln Sie KI-Anwendungen?         | checkbox<br><table border="1"> <tr><td>1</td><td>med_fachbereich__1</td><td>Allgemeinmedizin</td></tr> <tr><td>2</td><td>med_fachbereich__2</td><td>Anästhesiologie</td></tr> <tr><td>3</td><td>med_fachbereich__3</td><td>Anatomie</td></tr> <tr><td>4</td><td>med_fachbereich__4</td><td>Arbeitsmedizin</td></tr> <tr><td>5</td><td>med_fachbereich__5</td><td>Augenheilkunde</td></tr> <tr><td>6</td><td>med_fachbereich__6</td><td>Biochemie</td></tr> <tr><td>7</td><td>med_fachbereich__7</td><td>Chirurgie</td></tr> <tr><td>8</td><td>med_fachbereich__8</td><td>Frauenheilkunde und Geburtshilfe</td></tr> <tr><td>9</td><td>med_fachbereich__9</td><td>Hals-Nasen-Ohrenheilkunde</td></tr> <tr><td>10</td><td>med_fachbereich__10</td><td>Haut- und Geschlechtskrankheiten</td></tr> <tr><td>11</td><td>med_fachbereich__11</td><td>Humangenetik</td></tr> <tr><td>12</td><td>med_fachbereich__12</td><td>Hygiene und Umweltmedizin</td></tr> <tr><td>13</td><td>med_fachbereich__13</td><td>Innere Medizin</td></tr> <tr><td>14</td><td>med_fachbereich__14</td><td>Kinder- und Jugendmedizin</td></tr> <tr><td>15</td><td>med_fachbereich__15</td><td>Kinder- und Jugendpsychiatrie und -psychotherapie</td></tr> <tr><td>16</td><td>med_fachbereich__16</td><td>Laboratoriumsmedizin</td></tr> <tr><td>17</td><td>med_fachbereich__17</td><td>Mikrobiologie, Virologie und Infektionsepidemiologie</td></tr> <tr><td>18</td><td>med_fachbereich__18</td><td>Mund-Kiefer-Gesichtschirurgie</td></tr> <tr><td>19</td><td>med_fachbereich__19</td><td>Neurochirurgie</td></tr> <tr><td>20</td><td>med_fachbereich__20</td><td>Neurologie</td></tr> <tr><td>21</td><td>med_fachbereich__21</td><td>Nuklearmedizin</td></tr> <tr><td>22</td><td>med_fachbereich__22</td><td>Öffentliches Gesundheitswesen</td></tr> <tr><td>23</td><td>med_fachbereich__23</td><td>Pathologie</td></tr> <tr><td>24</td><td>med_fachbereich__24</td><td>Pharmakologie</td></tr> <tr><td>25</td><td>med_fachbereich__25</td><td>Phoniatrie und Pädaudiologie</td></tr> <tr><td>26</td><td>med_fachbereich__26</td><td>Physikalische und Rehabilitative Medizin</td></tr> <tr><td>27</td><td>med_fachbereich__27</td><td>Physiologie</td></tr> <tr><td>28</td><td>med_fachbereich__28</td><td>Psychiatrie und Psychotherapie</td></tr> <tr><td>29</td><td>med_fachbereich__29</td><td>Psychosomatische Medizin und Psychotherapie</td></tr> <tr><td>30</td><td>med_fachbereich__30</td><td>Radiologie</td></tr> <tr><td>31</td><td>med_fachbereich__31</td><td>Rechtsmedizin</td></tr> <tr><td>32</td><td>med_fachbereich__32</td><td>Strahlentherapie</td></tr> <tr><td>33</td><td>med_fachbereich__33</td><td>Transfusionsmedizin</td></tr> <tr><td>34</td><td>med_fachbereich__34</td><td>Urologie</td></tr> <tr><td>35</td><td>med_fachbereich__35</td><td>Medizininformatik/ Digitale Medizin</td></tr> <tr><td>36</td><td>med_fachbereich__36</td><td>Andere (bitte angeben)</td></tr> <tr><td>37</td><td>med_fachbereich__37</td><td>Keine Angabe</td></tr> </table> | 1 | med_fachbereich__1 | Allgemeinmedizin | 2 | med_fachbereich__2 | Anästhesiologie | 3 | med_fachbereich__3 | Anatomie | 4 | med_fachbereich__4 | Arbeitsmedizin | 5 | med_fachbereich__5 | Augenheilkunde | 6 | med_fachbereich__6 | Biochemie | 7 | med_fachbereich__7 | Chirurgie | 8 | med_fachbereich__8 | Frauenheilkunde und Geburtshilfe | 9 | med_fachbereich__9 | Hals-Nasen-Ohrenheilkunde | 10 | med_fachbereich__10 | Haut- und Geschlechtskrankheiten | 11 | med_fachbereich__11 | Humangenetik | 12 | med_fachbereich__12 | Hygiene und Umweltmedizin | 13 | med_fachbereich__13 | Innere Medizin | 14 | med_fachbereich__14 | Kinder- und Jugendmedizin | 15 | med_fachbereich__15 | Kinder- und Jugendpsychiatrie und -psychotherapie | 16 | med_fachbereich__16 | Laboratoriumsmedizin | 17 | med_fachbereich__17 | Mikrobiologie, Virologie und Infektionsepidemiologie | 18 | med_fachbereich__18 | Mund-Kiefer-Gesichtschirurgie | 19 | med_fachbereich__19 | Neurochirurgie | 20 | med_fachbereich__20 | Neurologie | 21 | med_fachbereich__21 | Nuklearmedizin | 22 | med_fachbereich__22 | Öffentliches Gesundheitswesen | 23 | med_fachbereich__23 | Pathologie | 24 | med_fachbereich__24 | Pharmakologie | 25 | med_fachbereich__25 | Phoniatrie und Pädaudiologie | 26 | med_fachbereich__26 | Physikalische und Rehabilitative Medizin | 27 | med_fachbereich__27 | Physiologie | 28 | med_fachbereich__28 | Psychiatrie und Psychotherapie | 29 | med_fachbereich__29 | Psychosomatische Medizin und Psychotherapie | 30 | med_fachbereich__30 | Radiologie | 31 | med_fachbereich__31 | Rechtsmedizin | 32 | med_fachbereich__32 | Strahlentherapie | 33 | med_fachbereich__33 | Transfusionsmedizin | 34 | med_fachbereich__34 | Urologie | 35 | med_fachbereich__35 | Medizininformatik/ Digitale Medizin | 36 | med_fachbereich__36 | Andere (bitte angeben) | 37 | med_fachbereich__37 | Keine Angabe |
| 1  | med_fachbereich__1                                                               | Allgemeinmedizin                                                            |                                                                                                                                                                                                                                                                                                                                                                                                                                                                                                                                                                                                                                                                                                                                                                                                                                                                                                                                                                                                                                                                                                                                                                                                                                                                                                                                                                                                                                                                                                                                                                                                                                                                                                                                                                                                                                                                                                                                                                                                                                                                                                                                                                                                                                                                                                                                                                                                                                                                                                                                                                                                                                                                                                                                                                                                                                                                                                                                                                                                                                                                  |   |                    |                  |   |                    |                 |   |                    |          |   |                    |                |   |                    |                |   |                    |           |   |                    |           |   |                    |                                  |   |                    |                           |    |                     |                                  |    |                     |              |    |                     |                           |    |                     |                |    |                     |                           |    |                     |                                                   |    |                     |                      |    |                     |                                                      |    |                     |                               |    |                     |                |    |                     |            |    |                     |                |    |                     |                               |    |                     |            |    |                     |               |    |                     |                              |    |                     |                                          |    |                     |             |    |                     |                                |    |                     |                                             |    |                     |            |    |                     |               |    |                     |                  |    |                     |                     |    |                     |          |    |                     |                                     |    |                     |                        |    |                     |              |
| 2  | med_fachbereich__2                                                               | Anästhesiologie                                                             |                                                                                                                                                                                                                                                                                                                                                                                                                                                                                                                                                                                                                                                                                                                                                                                                                                                                                                                                                                                                                                                                                                                                                                                                                                                                                                                                                                                                                                                                                                                                                                                                                                                                                                                                                                                                                                                                                                                                                                                                                                                                                                                                                                                                                                                                                                                                                                                                                                                                                                                                                                                                                                                                                                                                                                                                                                                                                                                                                                                                                                                                  |   |                    |                  |   |                    |                 |   |                    |          |   |                    |                |   |                    |                |   |                    |           |   |                    |           |   |                    |                                  |   |                    |                           |    |                     |                                  |    |                     |              |    |                     |                           |    |                     |                |    |                     |                           |    |                     |                                                   |    |                     |                      |    |                     |                                                      |    |                     |                               |    |                     |                |    |                     |            |    |                     |                |    |                     |                               |    |                     |            |    |                     |               |    |                     |                              |    |                     |                                          |    |                     |             |    |                     |                                |    |                     |                                             |    |                     |            |    |                     |               |    |                     |                  |    |                     |                     |    |                     |          |    |                     |                                     |    |                     |                        |    |                     |              |
| 3  | med_fachbereich__3                                                               | Anatomie                                                                    |                                                                                                                                                                                                                                                                                                                                                                                                                                                                                                                                                                                                                                                                                                                                                                                                                                                                                                                                                                                                                                                                                                                                                                                                                                                                                                                                                                                                                                                                                                                                                                                                                                                                                                                                                                                                                                                                                                                                                                                                                                                                                                                                                                                                                                                                                                                                                                                                                                                                                                                                                                                                                                                                                                                                                                                                                                                                                                                                                                                                                                                                  |   |                    |                  |   |                    |                 |   |                    |          |   |                    |                |   |                    |                |   |                    |           |   |                    |           |   |                    |                                  |   |                    |                           |    |                     |                                  |    |                     |              |    |                     |                           |    |                     |                |    |                     |                           |    |                     |                                                   |    |                     |                      |    |                     |                                                      |    |                     |                               |    |                     |                |    |                     |            |    |                     |                |    |                     |                               |    |                     |            |    |                     |               |    |                     |                              |    |                     |                                          |    |                     |             |    |                     |                                |    |                     |                                             |    |                     |            |    |                     |               |    |                     |                  |    |                     |                     |    |                     |          |    |                     |                                     |    |                     |                        |    |                     |              |
| 4  | med_fachbereich__4                                                               | Arbeitsmedizin                                                              |                                                                                                                                                                                                                                                                                                                                                                                                                                                                                                                                                                                                                                                                                                                                                                                                                                                                                                                                                                                                                                                                                                                                                                                                                                                                                                                                                                                                                                                                                                                                                                                                                                                                                                                                                                                                                                                                                                                                                                                                                                                                                                                                                                                                                                                                                                                                                                                                                                                                                                                                                                                                                                                                                                                                                                                                                                                                                                                                                                                                                                                                  |   |                    |                  |   |                    |                 |   |                    |          |   |                    |                |   |                    |                |   |                    |           |   |                    |           |   |                    |                                  |   |                    |                           |    |                     |                                  |    |                     |              |    |                     |                           |    |                     |                |    |                     |                           |    |                     |                                                   |    |                     |                      |    |                     |                                                      |    |                     |                               |    |                     |                |    |                     |            |    |                     |                |    |                     |                               |    |                     |            |    |                     |               |    |                     |                              |    |                     |                                          |    |                     |             |    |                     |                                |    |                     |                                             |    |                     |            |    |                     |               |    |                     |                  |    |                     |                     |    |                     |          |    |                     |                                     |    |                     |                        |    |                     |              |
| 5  | med_fachbereich__5                                                               | Augenheilkunde                                                              |                                                                                                                                                                                                                                                                                                                                                                                                                                                                                                                                                                                                                                                                                                                                                                                                                                                                                                                                                                                                                                                                                                                                                                                                                                                                                                                                                                                                                                                                                                                                                                                                                                                                                                                                                                                                                                                                                                                                                                                                                                                                                                                                                                                                                                                                                                                                                                                                                                                                                                                                                                                                                                                                                                                                                                                                                                                                                                                                                                                                                                                                  |   |                    |                  |   |                    |                 |   |                    |          |   |                    |                |   |                    |                |   |                    |           |   |                    |           |   |                    |                                  |   |                    |                           |    |                     |                                  |    |                     |              |    |                     |                           |    |                     |                |    |                     |                           |    |                     |                                                   |    |                     |                      |    |                     |                                                      |    |                     |                               |    |                     |                |    |                     |            |    |                     |                |    |                     |                               |    |                     |            |    |                     |               |    |                     |                              |    |                     |                                          |    |                     |             |    |                     |                                |    |                     |                                             |    |                     |            |    |                     |               |    |                     |                  |    |                     |                     |    |                     |          |    |                     |                                     |    |                     |                        |    |                     |              |
| 6  | med_fachbereich__6                                                               | Biochemie                                                                   |                                                                                                                                                                                                                                                                                                                                                                                                                                                                                                                                                                                                                                                                                                                                                                                                                                                                                                                                                                                                                                                                                                                                                                                                                                                                                                                                                                                                                                                                                                                                                                                                                                                                                                                                                                                                                                                                                                                                                                                                                                                                                                                                                                                                                                                                                                                                                                                                                                                                                                                                                                                                                                                                                                                                                                                                                                                                                                                                                                                                                                                                  |   |                    |                  |   |                    |                 |   |                    |          |   |                    |                |   |                    |                |   |                    |           |   |                    |           |   |                    |                                  |   |                    |                           |    |                     |                                  |    |                     |              |    |                     |                           |    |                     |                |    |                     |                           |    |                     |                                                   |    |                     |                      |    |                     |                                                      |    |                     |                               |    |                     |                |    |                     |            |    |                     |                |    |                     |                               |    |                     |            |    |                     |               |    |                     |                              |    |                     |                                          |    |                     |             |    |                     |                                |    |                     |                                             |    |                     |            |    |                     |               |    |                     |                  |    |                     |                     |    |                     |          |    |                     |                                     |    |                     |                        |    |                     |              |
| 7  | med_fachbereich__7                                                               | Chirurgie                                                                   |                                                                                                                                                                                                                                                                                                                                                                                                                                                                                                                                                                                                                                                                                                                                                                                                                                                                                                                                                                                                                                                                                                                                                                                                                                                                                                                                                                                                                                                                                                                                                                                                                                                                                                                                                                                                                                                                                                                                                                                                                                                                                                                                                                                                                                                                                                                                                                                                                                                                                                                                                                                                                                                                                                                                                                                                                                                                                                                                                                                                                                                                  |   |                    |                  |   |                    |                 |   |                    |          |   |                    |                |   |                    |                |   |                    |           |   |                    |           |   |                    |                                  |   |                    |                           |    |                     |                                  |    |                     |              |    |                     |                           |    |                     |                |    |                     |                           |    |                     |                                                   |    |                     |                      |    |                     |                                                      |    |                     |                               |    |                     |                |    |                     |            |    |                     |                |    |                     |                               |    |                     |            |    |                     |               |    |                     |                              |    |                     |                                          |    |                     |             |    |                     |                                |    |                     |                                             |    |                     |            |    |                     |               |    |                     |                  |    |                     |                     |    |                     |          |    |                     |                                     |    |                     |                        |    |                     |              |
| 8  | med_fachbereich__8                                                               | Frauenheilkunde und Geburtshilfe                                            |                                                                                                                                                                                                                                                                                                                                                                                                                                                                                                                                                                                                                                                                                                                                                                                                                                                                                                                                                                                                                                                                                                                                                                                                                                                                                                                                                                                                                                                                                                                                                                                                                                                                                                                                                                                                                                                                                                                                                                                                                                                                                                                                                                                                                                                                                                                                                                                                                                                                                                                                                                                                                                                                                                                                                                                                                                                                                                                                                                                                                                                                  |   |                    |                  |   |                    |                 |   |                    |          |   |                    |                |   |                    |                |   |                    |           |   |                    |           |   |                    |                                  |   |                    |                           |    |                     |                                  |    |                     |              |    |                     |                           |    |                     |                |    |                     |                           |    |                     |                                                   |    |                     |                      |    |                     |                                                      |    |                     |                               |    |                     |                |    |                     |            |    |                     |                |    |                     |                               |    |                     |            |    |                     |               |    |                     |                              |    |                     |                                          |    |                     |             |    |                     |                                |    |                     |                                             |    |                     |            |    |                     |               |    |                     |                  |    |                     |                     |    |                     |          |    |                     |                                     |    |                     |                        |    |                     |              |
| 9  | med_fachbereich__9                                                               | Hals-Nasen-Ohrenheilkunde                                                   |                                                                                                                                                                                                                                                                                                                                                                                                                                                                                                                                                                                                                                                                                                                                                                                                                                                                                                                                                                                                                                                                                                                                                                                                                                                                                                                                                                                                                                                                                                                                                                                                                                                                                                                                                                                                                                                                                                                                                                                                                                                                                                                                                                                                                                                                                                                                                                                                                                                                                                                                                                                                                                                                                                                                                                                                                                                                                                                                                                                                                                                                  |   |                    |                  |   |                    |                 |   |                    |          |   |                    |                |   |                    |                |   |                    |           |   |                    |           |   |                    |                                  |   |                    |                           |    |                     |                                  |    |                     |              |    |                     |                           |    |                     |                |    |                     |                           |    |                     |                                                   |    |                     |                      |    |                     |                                                      |    |                     |                               |    |                     |                |    |                     |            |    |                     |                |    |                     |                               |    |                     |            |    |                     |               |    |                     |                              |    |                     |                                          |    |                     |             |    |                     |                                |    |                     |                                             |    |                     |            |    |                     |               |    |                     |                  |    |                     |                     |    |                     |          |    |                     |                                     |    |                     |                        |    |                     |              |
| 10 | med_fachbereich__10                                                              | Haut- und Geschlechtskrankheiten                                            |                                                                                                                                                                                                                                                                                                                                                                                                                                                                                                                                                                                                                                                                                                                                                                                                                                                                                                                                                                                                                                                                                                                                                                                                                                                                                                                                                                                                                                                                                                                                                                                                                                                                                                                                                                                                                                                                                                                                                                                                                                                                                                                                                                                                                                                                                                                                                                                                                                                                                                                                                                                                                                                                                                                                                                                                                                                                                                                                                                                                                                                                  |   |                    |                  |   |                    |                 |   |                    |          |   |                    |                |   |                    |                |   |                    |           |   |                    |           |   |                    |                                  |   |                    |                           |    |                     |                                  |    |                     |              |    |                     |                           |    |                     |                |    |                     |                           |    |                     |                                                   |    |                     |                      |    |                     |                                                      |    |                     |                               |    |                     |                |    |                     |            |    |                     |                |    |                     |                               |    |                     |            |    |                     |               |    |                     |                              |    |                     |                                          |    |                     |             |    |                     |                                |    |                     |                                             |    |                     |            |    |                     |               |    |                     |                  |    |                     |                     |    |                     |          |    |                     |                                     |    |                     |                        |    |                     |              |
| 11 | med_fachbereich__11                                                              | Humangenetik                                                                |                                                                                                                                                                                                                                                                                                                                                                                                                                                                                                                                                                                                                                                                                                                                                                                                                                                                                                                                                                                                                                                                                                                                                                                                                                                                                                                                                                                                                                                                                                                                                                                                                                                                                                                                                                                                                                                                                                                                                                                                                                                                                                                                                                                                                                                                                                                                                                                                                                                                                                                                                                                                                                                                                                                                                                                                                                                                                                                                                                                                                                                                  |   |                    |                  |   |                    |                 |   |                    |          |   |                    |                |   |                    |                |   |                    |           |   |                    |           |   |                    |                                  |   |                    |                           |    |                     |                                  |    |                     |              |    |                     |                           |    |                     |                |    |                     |                           |    |                     |                                                   |    |                     |                      |    |                     |                                                      |    |                     |                               |    |                     |                |    |                     |            |    |                     |                |    |                     |                               |    |                     |            |    |                     |               |    |                     |                              |    |                     |                                          |    |                     |             |    |                     |                                |    |                     |                                             |    |                     |            |    |                     |               |    |                     |                  |    |                     |                     |    |                     |          |    |                     |                                     |    |                     |                        |    |                     |              |
| 12 | med_fachbereich__12                                                              | Hygiene und Umweltmedizin                                                   |                                                                                                                                                                                                                                                                                                                                                                                                                                                                                                                                                                                                                                                                                                                                                                                                                                                                                                                                                                                                                                                                                                                                                                                                                                                                                                                                                                                                                                                                                                                                                                                                                                                                                                                                                                                                                                                                                                                                                                                                                                                                                                                                                                                                                                                                                                                                                                                                                                                                                                                                                                                                                                                                                                                                                                                                                                                                                                                                                                                                                                                                  |   |                    |                  |   |                    |                 |   |                    |          |   |                    |                |   |                    |                |   |                    |           |   |                    |           |   |                    |                                  |   |                    |                           |    |                     |                                  |    |                     |              |    |                     |                           |    |                     |                |    |                     |                           |    |                     |                                                   |    |                     |                      |    |                     |                                                      |    |                     |                               |    |                     |                |    |                     |            |    |                     |                |    |                     |                               |    |                     |            |    |                     |               |    |                     |                              |    |                     |                                          |    |                     |             |    |                     |                                |    |                     |                                             |    |                     |            |    |                     |               |    |                     |                  |    |                     |                     |    |                     |          |    |                     |                                     |    |                     |                        |    |                     |              |
| 13 | med_fachbereich__13                                                              | Innere Medizin                                                              |                                                                                                                                                                                                                                                                                                                                                                                                                                                                                                                                                                                                                                                                                                                                                                                                                                                                                                                                                                                                                                                                                                                                                                                                                                                                                                                                                                                                                                                                                                                                                                                                                                                                                                                                                                                                                                                                                                                                                                                                                                                                                                                                                                                                                                                                                                                                                                                                                                                                                                                                                                                                                                                                                                                                                                                                                                                                                                                                                                                                                                                                  |   |                    |                  |   |                    |                 |   |                    |          |   |                    |                |   |                    |                |   |                    |           |   |                    |           |   |                    |                                  |   |                    |                           |    |                     |                                  |    |                     |              |    |                     |                           |    |                     |                |    |                     |                           |    |                     |                                                   |    |                     |                      |    |                     |                                                      |    |                     |                               |    |                     |                |    |                     |            |    |                     |                |    |                     |                               |    |                     |            |    |                     |               |    |                     |                              |    |                     |                                          |    |                     |             |    |                     |                                |    |                     |                                             |    |                     |            |    |                     |               |    |                     |                  |    |                     |                     |    |                     |          |    |                     |                                     |    |                     |                        |    |                     |              |
| 14 | med_fachbereich__14                                                              | Kinder- und Jugendmedizin                                                   |                                                                                                                                                                                                                                                                                                                                                                                                                                                                                                                                                                                                                                                                                                                                                                                                                                                                                                                                                                                                                                                                                                                                                                                                                                                                                                                                                                                                                                                                                                                                                                                                                                                                                                                                                                                                                                                                                                                                                                                                                                                                                                                                                                                                                                                                                                                                                                                                                                                                                                                                                                                                                                                                                                                                                                                                                                                                                                                                                                                                                                                                  |   |                    |                  |   |                    |                 |   |                    |          |   |                    |                |   |                    |                |   |                    |           |   |                    |           |   |                    |                                  |   |                    |                           |    |                     |                                  |    |                     |              |    |                     |                           |    |                     |                |    |                     |                           |    |                     |                                                   |    |                     |                      |    |                     |                                                      |    |                     |                               |    |                     |                |    |                     |            |    |                     |                |    |                     |                               |    |                     |            |    |                     |               |    |                     |                              |    |                     |                                          |    |                     |             |    |                     |                                |    |                     |                                             |    |                     |            |    |                     |               |    |                     |                  |    |                     |                     |    |                     |          |    |                     |                                     |    |                     |                        |    |                     |              |
| 15 | med_fachbereich__15                                                              | Kinder- und Jugendpsychiatrie und -psychotherapie                           |                                                                                                                                                                                                                                                                                                                                                                                                                                                                                                                                                                                                                                                                                                                                                                                                                                                                                                                                                                                                                                                                                                                                                                                                                                                                                                                                                                                                                                                                                                                                                                                                                                                                                                                                                                                                                                                                                                                                                                                                                                                                                                                                                                                                                                                                                                                                                                                                                                                                                                                                                                                                                                                                                                                                                                                                                                                                                                                                                                                                                                                                  |   |                    |                  |   |                    |                 |   |                    |          |   |                    |                |   |                    |                |   |                    |           |   |                    |           |   |                    |                                  |   |                    |                           |    |                     |                                  |    |                     |              |    |                     |                           |    |                     |                |    |                     |                           |    |                     |                                                   |    |                     |                      |    |                     |                                                      |    |                     |                               |    |                     |                |    |                     |            |    |                     |                |    |                     |                               |    |                     |            |    |                     |               |    |                     |                              |    |                     |                                          |    |                     |             |    |                     |                                |    |                     |                                             |    |                     |            |    |                     |               |    |                     |                  |    |                     |                     |    |                     |          |    |                     |                                     |    |                     |                        |    |                     |              |
| 16 | med_fachbereich__16                                                              | Laboratoriumsmedizin                                                        |                                                                                                                                                                                                                                                                                                                                                                                                                                                                                                                                                                                                                                                                                                                                                                                                                                                                                                                                                                                                                                                                                                                                                                                                                                                                                                                                                                                                                                                                                                                                                                                                                                                                                                                                                                                                                                                                                                                                                                                                                                                                                                                                                                                                                                                                                                                                                                                                                                                                                                                                                                                                                                                                                                                                                                                                                                                                                                                                                                                                                                                                  |   |                    |                  |   |                    |                 |   |                    |          |   |                    |                |   |                    |                |   |                    |           |   |                    |           |   |                    |                                  |   |                    |                           |    |                     |                                  |    |                     |              |    |                     |                           |    |                     |                |    |                     |                           |    |                     |                                                   |    |                     |                      |    |                     |                                                      |    |                     |                               |    |                     |                |    |                     |            |    |                     |                |    |                     |                               |    |                     |            |    |                     |               |    |                     |                              |    |                     |                                          |    |                     |             |    |                     |                                |    |                     |                                             |    |                     |            |    |                     |               |    |                     |                  |    |                     |                     |    |                     |          |    |                     |                                     |    |                     |                        |    |                     |              |
| 17 | med_fachbereich__17                                                              | Mikrobiologie, Virologie und Infektionsepidemiologie                        |                                                                                                                                                                                                                                                                                                                                                                                                                                                                                                                                                                                                                                                                                                                                                                                                                                                                                                                                                                                                                                                                                                                                                                                                                                                                                                                                                                                                                                                                                                                                                                                                                                                                                                                                                                                                                                                                                                                                                                                                                                                                                                                                                                                                                                                                                                                                                                                                                                                                                                                                                                                                                                                                                                                                                                                                                                                                                                                                                                                                                                                                  |   |                    |                  |   |                    |                 |   |                    |          |   |                    |                |   |                    |                |   |                    |           |   |                    |           |   |                    |                                  |   |                    |                           |    |                     |                                  |    |                     |              |    |                     |                           |    |                     |                |    |                     |                           |    |                     |                                                   |    |                     |                      |    |                     |                                                      |    |                     |                               |    |                     |                |    |                     |            |    |                     |                |    |                     |                               |    |                     |            |    |                     |               |    |                     |                              |    |                     |                                          |    |                     |             |    |                     |                                |    |                     |                                             |    |                     |            |    |                     |               |    |                     |                  |    |                     |                     |    |                     |          |    |                     |                                     |    |                     |                        |    |                     |              |
| 18 | med_fachbereich__18                                                              | Mund-Kiefer-Gesichtschirurgie                                               |                                                                                                                                                                                                                                                                                                                                                                                                                                                                                                                                                                                                                                                                                                                                                                                                                                                                                                                                                                                                                                                                                                                                                                                                                                                                                                                                                                                                                                                                                                                                                                                                                                                                                                                                                                                                                                                                                                                                                                                                                                                                                                                                                                                                                                                                                                                                                                                                                                                                                                                                                                                                                                                                                                                                                                                                                                                                                                                                                                                                                                                                  |   |                    |                  |   |                    |                 |   |                    |          |   |                    |                |   |                    |                |   |                    |           |   |                    |           |   |                    |                                  |   |                    |                           |    |                     |                                  |    |                     |              |    |                     |                           |    |                     |                |    |                     |                           |    |                     |                                                   |    |                     |                      |    |                     |                                                      |    |                     |                               |    |                     |                |    |                     |            |    |                     |                |    |                     |                               |    |                     |            |    |                     |               |    |                     |                              |    |                     |                                          |    |                     |             |    |                     |                                |    |                     |                                             |    |                     |            |    |                     |               |    |                     |                  |    |                     |                     |    |                     |          |    |                     |                                     |    |                     |                        |    |                     |              |
| 19 | med_fachbereich__19                                                              | Neurochirurgie                                                              |                                                                                                                                                                                                                                                                                                                                                                                                                                                                                                                                                                                                                                                                                                                                                                                                                                                                                                                                                                                                                                                                                                                                                                                                                                                                                                                                                                                                                                                                                                                                                                                                                                                                                                                                                                                                                                                                                                                                                                                                                                                                                                                                                                                                                                                                                                                                                                                                                                                                                                                                                                                                                                                                                                                                                                                                                                                                                                                                                                                                                                                                  |   |                    |                  |   |                    |                 |   |                    |          |   |                    |                |   |                    |                |   |                    |           |   |                    |           |   |                    |                                  |   |                    |                           |    |                     |                                  |    |                     |              |    |                     |                           |    |                     |                |    |                     |                           |    |                     |                                                   |    |                     |                      |    |                     |                                                      |    |                     |                               |    |                     |                |    |                     |            |    |                     |                |    |                     |                               |    |                     |            |    |                     |               |    |                     |                              |    |                     |                                          |    |                     |             |    |                     |                                |    |                     |                                             |    |                     |            |    |                     |               |    |                     |                  |    |                     |                     |    |                     |          |    |                     |                                     |    |                     |                        |    |                     |              |
| 20 | med_fachbereich__20                                                              | Neurologie                                                                  |                                                                                                                                                                                                                                                                                                                                                                                                                                                                                                                                                                                                                                                                                                                                                                                                                                                                                                                                                                                                                                                                                                                                                                                                                                                                                                                                                                                                                                                                                                                                                                                                                                                                                                                                                                                                                                                                                                                                                                                                                                                                                                                                                                                                                                                                                                                                                                                                                                                                                                                                                                                                                                                                                                                                                                                                                                                                                                                                                                                                                                                                  |   |                    |                  |   |                    |                 |   |                    |          |   |                    |                |   |                    |                |   |                    |           |   |                    |           |   |                    |                                  |   |                    |                           |    |                     |                                  |    |                     |              |    |                     |                           |    |                     |                |    |                     |                           |    |                     |                                                   |    |                     |                      |    |                     |                                                      |    |                     |                               |    |                     |                |    |                     |            |    |                     |                |    |                     |                               |    |                     |            |    |                     |               |    |                     |                              |    |                     |                                          |    |                     |             |    |                     |                                |    |                     |                                             |    |                     |            |    |                     |               |    |                     |                  |    |                     |                     |    |                     |          |    |                     |                                     |    |                     |                        |    |                     |              |
| 21 | med_fachbereich__21                                                              | Nuklearmedizin                                                              |                                                                                                                                                                                                                                                                                                                                                                                                                                                                                                                                                                                                                                                                                                                                                                                                                                                                                                                                                                                                                                                                                                                                                                                                                                                                                                                                                                                                                                                                                                                                                                                                                                                                                                                                                                                                                                                                                                                                                                                                                                                                                                                                                                                                                                                                                                                                                                                                                                                                                                                                                                                                                                                                                                                                                                                                                                                                                                                                                                                                                                                                  |   |                    |                  |   |                    |                 |   |                    |          |   |                    |                |   |                    |                |   |                    |           |   |                    |           |   |                    |                                  |   |                    |                           |    |                     |                                  |    |                     |              |    |                     |                           |    |                     |                |    |                     |                           |    |                     |                                                   |    |                     |                      |    |                     |                                                      |    |                     |                               |    |                     |                |    |                     |            |    |                     |                |    |                     |                               |    |                     |            |    |                     |               |    |                     |                              |    |                     |                                          |    |                     |             |    |                     |                                |    |                     |                                             |    |                     |            |    |                     |               |    |                     |                  |    |                     |                     |    |                     |          |    |                     |                                     |    |                     |                        |    |                     |              |
| 22 | med_fachbereich__22                                                              | Öffentliches Gesundheitswesen                                               |                                                                                                                                                                                                                                                                                                                                                                                                                                                                                                                                                                                                                                                                                                                                                                                                                                                                                                                                                                                                                                                                                                                                                                                                                                                                                                                                                                                                                                                                                                                                                                                                                                                                                                                                                                                                                                                                                                                                                                                                                                                                                                                                                                                                                                                                                                                                                                                                                                                                                                                                                                                                                                                                                                                                                                                                                                                                                                                                                                                                                                                                  |   |                    |                  |   |                    |                 |   |                    |          |   |                    |                |   |                    |                |   |                    |           |   |                    |           |   |                    |                                  |   |                    |                           |    |                     |                                  |    |                     |              |    |                     |                           |    |                     |                |    |                     |                           |    |                     |                                                   |    |                     |                      |    |                     |                                                      |    |                     |                               |    |                     |                |    |                     |            |    |                     |                |    |                     |                               |    |                     |            |    |                     |               |    |                     |                              |    |                     |                                          |    |                     |             |    |                     |                                |    |                     |                                             |    |                     |            |    |                     |               |    |                     |                  |    |                     |                     |    |                     |          |    |                     |                                     |    |                     |                        |    |                     |              |
| 23 | med_fachbereich__23                                                              | Pathologie                                                                  |                                                                                                                                                                                                                                                                                                                                                                                                                                                                                                                                                                                                                                                                                                                                                                                                                                                                                                                                                                                                                                                                                                                                                                                                                                                                                                                                                                                                                                                                                                                                                                                                                                                                                                                                                                                                                                                                                                                                                                                                                                                                                                                                                                                                                                                                                                                                                                                                                                                                                                                                                                                                                                                                                                                                                                                                                                                                                                                                                                                                                                                                  |   |                    |                  |   |                    |                 |   |                    |          |   |                    |                |   |                    |                |   |                    |           |   |                    |           |   |                    |                                  |   |                    |                           |    |                     |                                  |    |                     |              |    |                     |                           |    |                     |                |    |                     |                           |    |                     |                                                   |    |                     |                      |    |                     |                                                      |    |                     |                               |    |                     |                |    |                     |            |    |                     |                |    |                     |                               |    |                     |            |    |                     |               |    |                     |                              |    |                     |                                          |    |                     |             |    |                     |                                |    |                     |                                             |    |                     |            |    |                     |               |    |                     |                  |    |                     |                     |    |                     |          |    |                     |                                     |    |                     |                        |    |                     |              |
| 24 | med_fachbereich__24                                                              | Pharmakologie                                                               |                                                                                                                                                                                                                                                                                                                                                                                                                                                                                                                                                                                                                                                                                                                                                                                                                                                                                                                                                                                                                                                                                                                                                                                                                                                                                                                                                                                                                                                                                                                                                                                                                                                                                                                                                                                                                                                                                                                                                                                                                                                                                                                                                                                                                                                                                                                                                                                                                                                                                                                                                                                                                                                                                                                                                                                                                                                                                                                                                                                                                                                                  |   |                    |                  |   |                    |                 |   |                    |          |   |                    |                |   |                    |                |   |                    |           |   |                    |           |   |                    |                                  |   |                    |                           |    |                     |                                  |    |                     |              |    |                     |                           |    |                     |                |    |                     |                           |    |                     |                                                   |    |                     |                      |    |                     |                                                      |    |                     |                               |    |                     |                |    |                     |            |    |                     |                |    |                     |                               |    |                     |            |    |                     |               |    |                     |                              |    |                     |                                          |    |                     |             |    |                     |                                |    |                     |                                             |    |                     |            |    |                     |               |    |                     |                  |    |                     |                     |    |                     |          |    |                     |                                     |    |                     |                        |    |                     |              |
| 25 | med_fachbereich__25                                                              | Phoniatrie und Pädaudiologie                                                |                                                                                                                                                                                                                                                                                                                                                                                                                                                                                                                                                                                                                                                                                                                                                                                                                                                                                                                                                                                                                                                                                                                                                                                                                                                                                                                                                                                                                                                                                                                                                                                                                                                                                                                                                                                                                                                                                                                                                                                                                                                                                                                                                                                                                                                                                                                                                                                                                                                                                                                                                                                                                                                                                                                                                                                                                                                                                                                                                                                                                                                                  |   |                    |                  |   |                    |                 |   |                    |          |   |                    |                |   |                    |                |   |                    |           |   |                    |           |   |                    |                                  |   |                    |                           |    |                     |                                  |    |                     |              |    |                     |                           |    |                     |                |    |                     |                           |    |                     |                                                   |    |                     |                      |    |                     |                                                      |    |                     |                               |    |                     |                |    |                     |            |    |                     |                |    |                     |                               |    |                     |            |    |                     |               |    |                     |                              |    |                     |                                          |    |                     |             |    |                     |                                |    |                     |                                             |    |                     |            |    |                     |               |    |                     |                  |    |                     |                     |    |                     |          |    |                     |                                     |    |                     |                        |    |                     |              |
| 26 | med_fachbereich__26                                                              | Physikalische und Rehabilitative Medizin                                    |                                                                                                                                                                                                                                                                                                                                                                                                                                                                                                                                                                                                                                                                                                                                                                                                                                                                                                                                                                                                                                                                                                                                                                                                                                                                                                                                                                                                                                                                                                                                                                                                                                                                                                                                                                                                                                                                                                                                                                                                                                                                                                                                                                                                                                                                                                                                                                                                                                                                                                                                                                                                                                                                                                                                                                                                                                                                                                                                                                                                                                                                  |   |                    |                  |   |                    |                 |   |                    |          |   |                    |                |   |                    |                |   |                    |           |   |                    |           |   |                    |                                  |   |                    |                           |    |                     |                                  |    |                     |              |    |                     |                           |    |                     |                |    |                     |                           |    |                     |                                                   |    |                     |                      |    |                     |                                                      |    |                     |                               |    |                     |                |    |                     |            |    |                     |                |    |                     |                               |    |                     |            |    |                     |               |    |                     |                              |    |                     |                                          |    |                     |             |    |                     |                                |    |                     |                                             |    |                     |            |    |                     |               |    |                     |                  |    |                     |                     |    |                     |          |    |                     |                                     |    |                     |                        |    |                     |              |
| 27 | med_fachbereich__27                                                              | Physiologie                                                                 |                                                                                                                                                                                                                                                                                                                                                                                                                                                                                                                                                                                                                                                                                                                                                                                                                                                                                                                                                                                                                                                                                                                                                                                                                                                                                                                                                                                                                                                                                                                                                                                                                                                                                                                                                                                                                                                                                                                                                                                                                                                                                                                                                                                                                                                                                                                                                                                                                                                                                                                                                                                                                                                                                                                                                                                                                                                                                                                                                                                                                                                                  |   |                    |                  |   |                    |                 |   |                    |          |   |                    |                |   |                    |                |   |                    |           |   |                    |           |   |                    |                                  |   |                    |                           |    |                     |                                  |    |                     |              |    |                     |                           |    |                     |                |    |                     |                           |    |                     |                                                   |    |                     |                      |    |                     |                                                      |    |                     |                               |    |                     |                |    |                     |            |    |                     |                |    |                     |                               |    |                     |            |    |                     |               |    |                     |                              |    |                     |                                          |    |                     |             |    |                     |                                |    |                     |                                             |    |                     |            |    |                     |               |    |                     |                  |    |                     |                     |    |                     |          |    |                     |                                     |    |                     |                        |    |                     |              |
| 28 | med_fachbereich__28                                                              | Psychiatrie und Psychotherapie                                              |                                                                                                                                                                                                                                                                                                                                                                                                                                                                                                                                                                                                                                                                                                                                                                                                                                                                                                                                                                                                                                                                                                                                                                                                                                                                                                                                                                                                                                                                                                                                                                                                                                                                                                                                                                                                                                                                                                                                                                                                                                                                                                                                                                                                                                                                                                                                                                                                                                                                                                                                                                                                                                                                                                                                                                                                                                                                                                                                                                                                                                                                  |   |                    |                  |   |                    |                 |   |                    |          |   |                    |                |   |                    |                |   |                    |           |   |                    |           |   |                    |                                  |   |                    |                           |    |                     |                                  |    |                     |              |    |                     |                           |    |                     |                |    |                     |                           |    |                     |                                                   |    |                     |                      |    |                     |                                                      |    |                     |                               |    |                     |                |    |                     |            |    |                     |                |    |                     |                               |    |                     |            |    |                     |               |    |                     |                              |    |                     |                                          |    |                     |             |    |                     |                                |    |                     |                                             |    |                     |            |    |                     |               |    |                     |                  |    |                     |                     |    |                     |          |    |                     |                                     |    |                     |                        |    |                     |              |
| 29 | med_fachbereich__29                                                              | Psychosomatische Medizin und Psychotherapie                                 |                                                                                                                                                                                                                                                                                                                                                                                                                                                                                                                                                                                                                                                                                                                                                                                                                                                                                                                                                                                                                                                                                                                                                                                                                                                                                                                                                                                                                                                                                                                                                                                                                                                                                                                                                                                                                                                                                                                                                                                                                                                                                                                                                                                                                                                                                                                                                                                                                                                                                                                                                                                                                                                                                                                                                                                                                                                                                                                                                                                                                                                                  |   |                    |                  |   |                    |                 |   |                    |          |   |                    |                |   |                    |                |   |                    |           |   |                    |           |   |                    |                                  |   |                    |                           |    |                     |                                  |    |                     |              |    |                     |                           |    |                     |                |    |                     |                           |    |                     |                                                   |    |                     |                      |    |                     |                                                      |    |                     |                               |    |                     |                |    |                     |            |    |                     |                |    |                     |                               |    |                     |            |    |                     |               |    |                     |                              |    |                     |                                          |    |                     |             |    |                     |                                |    |                     |                                             |    |                     |            |    |                     |               |    |                     |                  |    |                     |                     |    |                     |          |    |                     |                                     |    |                     |                        |    |                     |              |
| 30 | med_fachbereich__30                                                              | Radiologie                                                                  |                                                                                                                                                                                                                                                                                                                                                                                                                                                                                                                                                                                                                                                                                                                                                                                                                                                                                                                                                                                                                                                                                                                                                                                                                                                                                                                                                                                                                                                                                                                                                                                                                                                                                                                                                                                                                                                                                                                                                                                                                                                                                                                                                                                                                                                                                                                                                                                                                                                                                                                                                                                                                                                                                                                                                                                                                                                                                                                                                                                                                                                                  |   |                    |                  |   |                    |                 |   |                    |          |   |                    |                |   |                    |                |   |                    |           |   |                    |           |   |                    |                                  |   |                    |                           |    |                     |                                  |    |                     |              |    |                     |                           |    |                     |                |    |                     |                           |    |                     |                                                   |    |                     |                      |    |                     |                                                      |    |                     |                               |    |                     |                |    |                     |            |    |                     |                |    |                     |                               |    |                     |            |    |                     |               |    |                     |                              |    |                     |                                          |    |                     |             |    |                     |                                |    |                     |                                             |    |                     |            |    |                     |               |    |                     |                  |    |                     |                     |    |                     |          |    |                     |                                     |    |                     |                        |    |                     |              |
| 31 | med_fachbereich__31                                                              | Rechtsmedizin                                                               |                                                                                                                                                                                                                                                                                                                                                                                                                                                                                                                                                                                                                                                                                                                                                                                                                                                                                                                                                                                                                                                                                                                                                                                                                                                                                                                                                                                                                                                                                                                                                                                                                                                                                                                                                                                                                                                                                                                                                                                                                                                                                                                                                                                                                                                                                                                                                                                                                                                                                                                                                                                                                                                                                                                                                                                                                                                                                                                                                                                                                                                                  |   |                    |                  |   |                    |                 |   |                    |          |   |                    |                |   |                    |                |   |                    |           |   |                    |           |   |                    |                                  |   |                    |                           |    |                     |                                  |    |                     |              |    |                     |                           |    |                     |                |    |                     |                           |    |                     |                                                   |    |                     |                      |    |                     |                                                      |    |                     |                               |    |                     |                |    |                     |            |    |                     |                |    |                     |                               |    |                     |            |    |                     |               |    |                     |                              |    |                     |                                          |    |                     |             |    |                     |                                |    |                     |                                             |    |                     |            |    |                     |               |    |                     |                  |    |                     |                     |    |                     |          |    |                     |                                     |    |                     |                        |    |                     |              |
| 32 | med_fachbereich__32                                                              | Strahlentherapie                                                            |                                                                                                                                                                                                                                                                                                                                                                                                                                                                                                                                                                                                                                                                                                                                                                                                                                                                                                                                                                                                                                                                                                                                                                                                                                                                                                                                                                                                                                                                                                                                                                                                                                                                                                                                                                                                                                                                                                                                                                                                                                                                                                                                                                                                                                                                                                                                                                                                                                                                                                                                                                                                                                                                                                                                                                                                                                                                                                                                                                                                                                                                  |   |                    |                  |   |                    |                 |   |                    |          |   |                    |                |   |                    |                |   |                    |           |   |                    |           |   |                    |                                  |   |                    |                           |    |                     |                                  |    |                     |              |    |                     |                           |    |                     |                |    |                     |                           |    |                     |                                                   |    |                     |                      |    |                     |                                                      |    |                     |                               |    |                     |                |    |                     |            |    |                     |                |    |                     |                               |    |                     |            |    |                     |               |    |                     |                              |    |                     |                                          |    |                     |             |    |                     |                                |    |                     |                                             |    |                     |            |    |                     |               |    |                     |                  |    |                     |                     |    |                     |          |    |                     |                                     |    |                     |                        |    |                     |              |
| 33 | med_fachbereich__33                                                              | Transfusionsmedizin                                                         |                                                                                                                                                                                                                                                                                                                                                                                                                                                                                                                                                                                                                                                                                                                                                                                                                                                                                                                                                                                                                                                                                                                                                                                                                                                                                                                                                                                                                                                                                                                                                                                                                                                                                                                                                                                                                                                                                                                                                                                                                                                                                                                                                                                                                                                                                                                                                                                                                                                                                                                                                                                                                                                                                                                                                                                                                                                                                                                                                                                                                                                                  |   |                    |                  |   |                    |                 |   |                    |          |   |                    |                |   |                    |                |   |                    |           |   |                    |           |   |                    |                                  |   |                    |                           |    |                     |                                  |    |                     |              |    |                     |                           |    |                     |                |    |                     |                           |    |                     |                                                   |    |                     |                      |    |                     |                                                      |    |                     |                               |    |                     |                |    |                     |            |    |                     |                |    |                     |                               |    |                     |            |    |                     |               |    |                     |                              |    |                     |                                          |    |                     |             |    |                     |                                |    |                     |                                             |    |                     |            |    |                     |               |    |                     |                  |    |                     |                     |    |                     |          |    |                     |                                     |    |                     |                        |    |                     |              |
| 34 | med_fachbereich__34                                                              | Urologie                                                                    |                                                                                                                                                                                                                                                                                                                                                                                                                                                                                                                                                                                                                                                                                                                                                                                                                                                                                                                                                                                                                                                                                                                                                                                                                                                                                                                                                                                                                                                                                                                                                                                                                                                                                                                                                                                                                                                                                                                                                                                                                                                                                                                                                                                                                                                                                                                                                                                                                                                                                                                                                                                                                                                                                                                                                                                                                                                                                                                                                                                                                                                                  |   |                    |                  |   |                    |                 |   |                    |          |   |                    |                |   |                    |                |   |                    |           |   |                    |           |   |                    |                                  |   |                    |                           |    |                     |                                  |    |                     |              |    |                     |                           |    |                     |                |    |                     |                           |    |                     |                                                   |    |                     |                      |    |                     |                                                      |    |                     |                               |    |                     |                |    |                     |            |    |                     |                |    |                     |                               |    |                     |            |    |                     |               |    |                     |                              |    |                     |                                          |    |                     |             |    |                     |                                |    |                     |                                             |    |                     |            |    |                     |               |    |                     |                  |    |                     |                     |    |                     |          |    |                     |                                     |    |                     |                        |    |                     |              |
| 35 | med_fachbereich__35                                                              | Medizininformatik/ Digitale Medizin                                         |                                                                                                                                                                                                                                                                                                                                                                                                                                                                                                                                                                                                                                                                                                                                                                                                                                                                                                                                                                                                                                                                                                                                                                                                                                                                                                                                                                                                                                                                                                                                                                                                                                                                                                                                                                                                                                                                                                                                                                                                                                                                                                                                                                                                                                                                                                                                                                                                                                                                                                                                                                                                                                                                                                                                                                                                                                                                                                                                                                                                                                                                  |   |                    |                  |   |                    |                 |   |                    |          |   |                    |                |   |                    |                |   |                    |           |   |                    |           |   |                    |                                  |   |                    |                           |    |                     |                                  |    |                     |              |    |                     |                           |    |                     |                |    |                     |                           |    |                     |                                                   |    |                     |                      |    |                     |                                                      |    |                     |                               |    |                     |                |    |                     |            |    |                     |                |    |                     |                               |    |                     |            |    |                     |               |    |                     |                              |    |                     |                                          |    |                     |             |    |                     |                                |    |                     |                                             |    |                     |            |    |                     |               |    |                     |                  |    |                     |                     |    |                     |          |    |                     |                                     |    |                     |                        |    |                     |              |
| 36 | med_fachbereich__36                                                              | Andere (bitte angeben)                                                      |                                                                                                                                                                                                                                                                                                                                                                                                                                                                                                                                                                                                                                                                                                                                                                                                                                                                                                                                                                                                                                                                                                                                                                                                                                                                                                                                                                                                                                                                                                                                                                                                                                                                                                                                                                                                                                                                                                                                                                                                                                                                                                                                                                                                                                                                                                                                                                                                                                                                                                                                                                                                                                                                                                                                                                                                                                                                                                                                                                                                                                                                  |   |                    |                  |   |                    |                 |   |                    |          |   |                    |                |   |                    |                |   |                    |           |   |                    |           |   |                    |                                  |   |                    |                           |    |                     |                                  |    |                     |              |    |                     |                           |    |                     |                |    |                     |                           |    |                     |                                                   |    |                     |                      |    |                     |                                                      |    |                     |                               |    |                     |                |    |                     |            |    |                     |                |    |                     |                               |    |                     |            |    |                     |               |    |                     |                              |    |                     |                                          |    |                     |             |    |                     |                                |    |                     |                                             |    |                     |            |    |                     |               |    |                     |                  |    |                     |                     |    |                     |          |    |                     |                                     |    |                     |                        |    |                     |              |
| 37 | med_fachbereich__37                                                              | Keine Angabe                                                                |                                                                                                                                                                                                                                                                                                                                                                                                                                                                                                                                                                                                                                                                                                                                                                                                                                                                                                                                                                                                                                                                                                                                                                                                                                                                                                                                                                                                                                                                                                                                                                                                                                                                                                                                                                                                                                                                                                                                                                                                                                                                                                                                                                                                                                                                                                                                                                                                                                                                                                                                                                                                                                                                                                                                                                                                                                                                                                                                                                                                                                                                  |   |                    |                  |   |                    |                 |   |                    |          |   |                    |                |   |                    |                |   |                    |           |   |                    |           |   |                    |                                  |   |                    |                           |    |                     |                                  |    |                     |              |    |                     |                           |    |                     |                |    |                     |                           |    |                     |                                                   |    |                     |                      |    |                     |                                                      |    |                     |                               |    |                     |                |    |                     |            |    |                     |                |    |                     |                               |    |                     |            |    |                     |               |    |                     |                              |    |                     |                                          |    |                     |             |    |                     |                                |    |                     |                                             |    |                     |            |    |                     |               |    |                     |                  |    |                     |                     |    |                     |          |    |                     |                                     |    |                     |                        |    |                     |              |
| 19 | med_fachbereich_andere<br>Show the field ONLY if:<br>[med_fachbereich(36)] = '1' | In welchem anderen medizinischen Fachbereich entwickeln Sie KI-Anwendungen: | text                                                                                                                                                                                                                                                                                                                                                                                                                                                                                                                                                                                                                                                                                                                                                                                                                                                                                                                                                                                                                                                                                                                                                                                                                                                                                                                                                                                                                                                                                                                                                                                                                                                                                                                                                                                                                                                                                                                                                                                                                                                                                                                                                                                                                                                                                                                                                                                                                                                                                                                                                                                                                                                                                                                                                                                                                                                                                                                                                                                                                                                             |   |                    |                  |   |                    |                 |   |                    |          |   |                    |                |   |                    |                |   |                    |           |   |                    |           |   |                    |                                  |   |                    |                           |    |                     |                                  |    |                     |              |    |                     |                           |    |                     |                |    |                     |                           |    |                     |                                                   |    |                     |                      |    |                     |                                                      |    |                     |                               |    |                     |                |    |                     |            |    |                     |                |    |                     |                               |    |                     |            |    |                     |               |    |                     |                              |    |                     |                                          |    |                     |             |    |                     |                                |    |                     |                                             |    |                     |            |    |                     |               |    |                     |                  |    |                     |                     |    |                     |          |    |                     |                                     |    |                     |                        |    |                     |              |

|    |                                                                        |                                                                                      |                                                                                                                                                                                                                                                                                                                                                                                                                                                                                                                                                                  |   |                                                |                             |                                                                        |                      |                                                                    |   |                      |                                                                     |   |                      |                                        |   |               |                        |   |               |                        |   |               |              |
|----|------------------------------------------------------------------------|--------------------------------------------------------------------------------------|------------------------------------------------------------------------------------------------------------------------------------------------------------------------------------------------------------------------------------------------------------------------------------------------------------------------------------------------------------------------------------------------------------------------------------------------------------------------------------------------------------------------------------------------------------------|---|------------------------------------------------|-----------------------------|------------------------------------------------------------------------|----------------------|--------------------------------------------------------------------|---|----------------------|---------------------------------------------------------------------|---|----------------------|----------------------------------------|---|---------------|------------------------|---|---------------|------------------------|---|---------------|--------------|
| 20 | ki_art                                                                 | In welchem der folgenden KI Bereiche entwickeln Sie?                                 | checkbox<br><table border="1"> <tr><td>1</td><td>ki_art__1</td><td>Maschinelles Lernen</td></tr> <tr><td>2</td><td>ki_art__2</td><td>Deep Learning</td></tr> <tr><td>3</td><td>ki_art__3</td><td>Andere Form von KI</td></tr> <tr><td>4</td><td>ki_art__4</td><td>Keine Angabe</td></tr> </table>                                                                                                                                                                                                                                                                | 1 | ki_art__1                                      | Maschinelles Lernen         | 2                                                                      | ki_art__2            | Deep Learning                                                      | 3 | ki_art__3            | Andere Form von KI                                                  | 4 | ki_art__4            | Keine Angabe                           |   |               |                        |   |               |                        |   |               |              |
| 1  | ki_art__1                                                              | Maschinelles Lernen                                                                  |                                                                                                                                                                                                                                                                                                                                                                                                                                                                                                                                                                  |   |                                                |                             |                                                                        |                      |                                                                    |   |                      |                                                                     |   |                      |                                        |   |               |                        |   |               |                        |   |               |              |
| 2  | ki_art__2                                                              | Deep Learning                                                                        |                                                                                                                                                                                                                                                                                                                                                                                                                                                                                                                                                                  |   |                                                |                             |                                                                        |                      |                                                                    |   |                      |                                                                     |   |                      |                                        |   |               |                        |   |               |                        |   |               |              |
| 3  | ki_art__3                                                              | Andere Form von KI                                                                   |                                                                                                                                                                                                                                                                                                                                                                                                                                                                                                                                                                  |   |                                                |                             |                                                                        |                      |                                                                    |   |                      |                                                                     |   |                      |                                        |   |               |                        |   |               |                        |   |               |              |
| 4  | ki_art__4                                                              | Keine Angabe                                                                         |                                                                                                                                                                                                                                                                                                                                                                                                                                                                                                                                                                  |   |                                                |                             |                                                                        |                      |                                                                    |   |                      |                                                                     |   |                      |                                        |   |               |                        |   |               |                        |   |               |              |
| 21 | ki_art_ml<br>Show the field ONLY if:<br>[ki_art(1)] = '1'              | Bitte spezifizieren Sie die Art von Maschinellern Lernen (ML) welche Sie entwickeln: | checkbox<br><table border="1"> <tr><td>1</td><td>ki_art_ml__1</td><td>Supervised ML</td></tr> <tr><td>2</td><td>ki_art_ml__2</td><td>Semi-supervised ML</td></tr> <tr><td>3</td><td>ki_art_ml__3</td><td>Unsupervised ML</td></tr> <tr><td>4</td><td>ki_art_ml__4</td><td>Reinforcement learning</td></tr> <tr><td>5</td><td>ki_art_ml__5</td><td>Andere</td></tr> <tr><td>6</td><td>ki_art_ml__6</td><td>Keine Angabe</td></tr> </table>                                                                                                                        | 1 | ki_art_ml__1                                   | Supervised ML               | 2                                                                      | ki_art_ml__2         | Semi-supervised ML                                                 | 3 | ki_art_ml__3         | Unsupervised ML                                                     | 4 | ki_art_ml__4         | Reinforcement learning                 | 5 | ki_art_ml__5  | Andere                 | 6 | ki_art_ml__6  | Keine Angabe           |   |               |              |
| 1  | ki_art_ml__1                                                           | Supervised ML                                                                        |                                                                                                                                                                                                                                                                                                                                                                                                                                                                                                                                                                  |   |                                                |                             |                                                                        |                      |                                                                    |   |                      |                                                                     |   |                      |                                        |   |               |                        |   |               |                        |   |               |              |
| 2  | ki_art_ml__2                                                           | Semi-supervised ML                                                                   |                                                                                                                                                                                                                                                                                                                                                                                                                                                                                                                                                                  |   |                                                |                             |                                                                        |                      |                                                                    |   |                      |                                                                     |   |                      |                                        |   |               |                        |   |               |                        |   |               |              |
| 3  | ki_art_ml__3                                                           | Unsupervised ML                                                                      |                                                                                                                                                                                                                                                                                                                                                                                                                                                                                                                                                                  |   |                                                |                             |                                                                        |                      |                                                                    |   |                      |                                                                     |   |                      |                                        |   |               |                        |   |               |                        |   |               |              |
| 4  | ki_art_ml__4                                                           | Reinforcement learning                                                               |                                                                                                                                                                                                                                                                                                                                                                                                                                                                                                                                                                  |   |                                                |                             |                                                                        |                      |                                                                    |   |                      |                                                                     |   |                      |                                        |   |               |                        |   |               |                        |   |               |              |
| 5  | ki_art_ml__5                                                           | Andere                                                                               |                                                                                                                                                                                                                                                                                                                                                                                                                                                                                                                                                                  |   |                                                |                             |                                                                        |                      |                                                                    |   |                      |                                                                     |   |                      |                                        |   |               |                        |   |               |                        |   |               |              |
| 6  | ki_art_ml__6                                                           | Keine Angabe                                                                         |                                                                                                                                                                                                                                                                                                                                                                                                                                                                                                                                                                  |   |                                                |                             |                                                                        |                      |                                                                    |   |                      |                                                                     |   |                      |                                        |   |               |                        |   |               |                        |   |               |              |
| 22 | ki_art_dl<br>Show the field ONLY if:<br>[ki_art(2)] = '1'              | Bitte spezifizieren Sie die Art von Deep Learning welche Sie entwickeln:             | checkbox<br><table border="1"> <tr><td>1</td><td>ki_art_dl__1</td><td>Convolutional Networks</td></tr> <tr><td>2</td><td>ki_art_dl__2</td><td>Recurrent neural Networks</td></tr> <tr><td>3</td><td>ki_art_dl__3</td><td>Autoencoders</td></tr> <tr><td>4</td><td>ki_art_dl__4</td><td>Andere</td></tr> <tr><td>5</td><td>ki_art_dl__5</td><td>Keine Angabe</td></tr> </table>                                                                                                                                                                                   | 1 | ki_art_dl__1                                   | Convolutional Networks      | 2                                                                      | ki_art_dl__2         | Recurrent neural Networks                                          | 3 | ki_art_dl__3         | Autoencoders                                                        | 4 | ki_art_dl__4         | Andere                                 | 5 | ki_art_dl__5  | Keine Angabe           |   |               |                        |   |               |              |
| 1  | ki_art_dl__1                                                           | Convolutional Networks                                                               |                                                                                                                                                                                                                                                                                                                                                                                                                                                                                                                                                                  |   |                                                |                             |                                                                        |                      |                                                                    |   |                      |                                                                     |   |                      |                                        |   |               |                        |   |               |                        |   |               |              |
| 2  | ki_art_dl__2                                                           | Recurrent neural Networks                                                            |                                                                                                                                                                                                                                                                                                                                                                                                                                                                                                                                                                  |   |                                                |                             |                                                                        |                      |                                                                    |   |                      |                                                                     |   |                      |                                        |   |               |                        |   |               |                        |   |               |              |
| 3  | ki_art_dl__3                                                           | Autoencoders                                                                         |                                                                                                                                                                                                                                                                                                                                                                                                                                                                                                                                                                  |   |                                                |                             |                                                                        |                      |                                                                    |   |                      |                                                                     |   |                      |                                        |   |               |                        |   |               |                        |   |               |              |
| 4  | ki_art_dl__4                                                           | Andere                                                                               |                                                                                                                                                                                                                                                                                                                                                                                                                                                                                                                                                                  |   |                                                |                             |                                                                        |                      |                                                                    |   |                      |                                                                     |   |                      |                                        |   |               |                        |   |               |                        |   |               |              |
| 5  | ki_art_dl__5                                                           | Keine Angabe                                                                         |                                                                                                                                                                                                                                                                                                                                                                                                                                                                                                                                                                  |   |                                                |                             |                                                                        |                      |                                                                    |   |                      |                                                                     |   |                      |                                        |   |               |                        |   |               |                        |   |               |              |
| 23 | ki_bereich                                                             | In welchem der folgenden KI Bereiche entwickeln Sie?                                 | checkbox<br><table border="1"> <tr><td>1</td><td>ki_bereich__1</td><td>Natural Language Processing</td></tr> <tr><td>2</td><td>ki_bereich__2</td><td>Clinical Decision Support</td></tr> <tr><td>3</td><td>ki_bereich__3</td><td>Bildverarbeitung</td></tr> <tr><td>4</td><td>ki_bereich__4</td><td>Computer Vision (Bsp. Objekterkennung)</td></tr> <tr><td>5</td><td>ki_bereich__5</td><td>Robotics</td></tr> <tr><td>6</td><td>ki_bereich__6</td><td>Andere (bitte angeben)</td></tr> <tr><td>7</td><td>ki_bereich__7</td><td>Keine Angabe</td></tr> </table> | 1 | ki_bereich__1                                  | Natural Language Processing | 2                                                                      | ki_bereich__2        | Clinical Decision Support                                          | 3 | ki_bereich__3        | Bildverarbeitung                                                    | 4 | ki_bereich__4        | Computer Vision (Bsp. Objekterkennung) | 5 | ki_bereich__5 | Robotics               | 6 | ki_bereich__6 | Andere (bitte angeben) | 7 | ki_bereich__7 | Keine Angabe |
| 1  | ki_bereich__1                                                          | Natural Language Processing                                                          |                                                                                                                                                                                                                                                                                                                                                                                                                                                                                                                                                                  |   |                                                |                             |                                                                        |                      |                                                                    |   |                      |                                                                     |   |                      |                                        |   |               |                        |   |               |                        |   |               |              |
| 2  | ki_bereich__2                                                          | Clinical Decision Support                                                            |                                                                                                                                                                                                                                                                                                                                                                                                                                                                                                                                                                  |   |                                                |                             |                                                                        |                      |                                                                    |   |                      |                                                                     |   |                      |                                        |   |               |                        |   |               |                        |   |               |              |
| 3  | ki_bereich__3                                                          | Bildverarbeitung                                                                     |                                                                                                                                                                                                                                                                                                                                                                                                                                                                                                                                                                  |   |                                                |                             |                                                                        |                      |                                                                    |   |                      |                                                                     |   |                      |                                        |   |               |                        |   |               |                        |   |               |              |
| 4  | ki_bereich__4                                                          | Computer Vision (Bsp. Objekterkennung)                                               |                                                                                                                                                                                                                                                                                                                                                                                                                                                                                                                                                                  |   |                                                |                             |                                                                        |                      |                                                                    |   |                      |                                                                     |   |                      |                                        |   |               |                        |   |               |                        |   |               |              |
| 5  | ki_bereich__5                                                          | Robotics                                                                             |                                                                                                                                                                                                                                                                                                                                                                                                                                                                                                                                                                  |   |                                                |                             |                                                                        |                      |                                                                    |   |                      |                                                                     |   |                      |                                        |   |               |                        |   |               |                        |   |               |              |
| 6  | ki_bereich__6                                                          | Andere (bitte angeben)                                                               |                                                                                                                                                                                                                                                                                                                                                                                                                                                                                                                                                                  |   |                                                |                             |                                                                        |                      |                                                                    |   |                      |                                                                     |   |                      |                                        |   |               |                        |   |               |                        |   |               |              |
| 7  | ki_bereich__7                                                          | Keine Angabe                                                                         |                                                                                                                                                                                                                                                                                                                                                                                                                                                                                                                                                                  |   |                                                |                             |                                                                        |                      |                                                                    |   |                      |                                                                     |   |                      |                                        |   |               |                        |   |               |                        |   |               |              |
| 24 | ki_bereich_andere<br>Show the field ONLY if:<br>[ki_bereich(6)] = '1'  | In welchem anderen KI Bereich entwickeln Sie:                                        | text                                                                                                                                                                                                                                                                                                                                                                                                                                                                                                                                                             |   |                                                |                             |                                                                        |                      |                                                                    |   |                      |                                                                     |   |                      |                                        |   |               |                        |   |               |                        |   |               |              |
| 25 | bias_ki                                                                | Wie vertraut sind sie mit Bias in der KI?                                            | radio<br><table border="1"> <tr><td>1</td><td>Ich habe von Bias in der KI noch nichts gehört</td></tr> <tr><td>2</td><td>Ich habe von Bias gehört, aber könnte keine konkreten Beispiele nennen</td></tr> <tr><td>3</td><td>Ich habe von Bias in der KI gehört und kenne spezifische Use-cases</td></tr> </table>                                                                                                                                                                                                                                                | 1 | Ich habe von Bias in der KI noch nichts gehört | 2                           | Ich habe von Bias gehört, aber könnte keine konkreten Beispiele nennen | 3                    | Ich habe von Bias in der KI gehört und kenne spezifische Use-cases |   |                      |                                                                     |   |                      |                                        |   |               |                        |   |               |                        |   |               |              |
| 1  | Ich habe von Bias in der KI noch nichts gehört                         |                                                                                      |                                                                                                                                                                                                                                                                                                                                                                                                                                                                                                                                                                  |   |                                                |                             |                                                                        |                      |                                                                    |   |                      |                                                                     |   |                      |                                        |   |               |                        |   |               |                        |   |               |              |
| 2  | Ich habe von Bias gehört, aber könnte keine konkreten Beispiele nennen |                                                                                      |                                                                                                                                                                                                                                                                                                                                                                                                                                                                                                                                                                  |   |                                                |                             |                                                                        |                      |                                                                    |   |                      |                                                                     |   |                      |                                        |   |               |                        |   |               |                        |   |               |              |
| 3  | Ich habe von Bias in der KI gehört und kenne spezifische Use-cases     |                                                                                      |                                                                                                                                                                                                                                                                                                                                                                                                                                                                                                                                                                  |   |                                                |                             |                                                                        |                      |                                                                    |   |                      |                                                                     |   |                      |                                        |   |               |                        |   |               |                        |   |               |              |
| 26 | bias_feld                                                              | Wo kann Ihrer Meinung nach Bias in KI auftreten?                                     | checkbox<br><table border="1"> <tr><td>1</td><td>bias_feld__1</td><td>Methodik der Algorithmen</td></tr> <tr><td>2</td><td>bias_feld__2</td><td>Gesellschaftliche Faktoren</td></tr> <tr><td>3</td><td>bias_feld__3</td><td>Bias basierend auf Datenvalidierungs- oder Datensicherheitsmethodik</td></tr> <tr><td>4</td><td>bias_feld__4</td><td>Trifft nicht zu</td></tr> <tr><td>5</td><td>bias_feld__5</td><td>Andere (bitte angeben)</td></tr> <tr><td>6</td><td>bias_feld__6</td><td>Keine der genannten</td></tr> </table>                                 | 1 | bias_feld__1                                   | Methodik der Algorithmen    | 2                                                                      | bias_feld__2         | Gesellschaftliche Faktoren                                         | 3 | bias_feld__3         | Bias basierend auf Datenvalidierungs- oder Datensicherheitsmethodik | 4 | bias_feld__4         | Trifft nicht zu                        | 5 | bias_feld__5  | Andere (bitte angeben) | 6 | bias_feld__6  | Keine der genannten    |   |               |              |
| 1  | bias_feld__1                                                           | Methodik der Algorithmen                                                             |                                                                                                                                                                                                                                                                                                                                                                                                                                                                                                                                                                  |   |                                                |                             |                                                                        |                      |                                                                    |   |                      |                                                                     |   |                      |                                        |   |               |                        |   |               |                        |   |               |              |
| 2  | bias_feld__2                                                           | Gesellschaftliche Faktoren                                                           |                                                                                                                                                                                                                                                                                                                                                                                                                                                                                                                                                                  |   |                                                |                             |                                                                        |                      |                                                                    |   |                      |                                                                     |   |                      |                                        |   |               |                        |   |               |                        |   |               |              |
| 3  | bias_feld__3                                                           | Bias basierend auf Datenvalidierungs- oder Datensicherheitsmethodik                  |                                                                                                                                                                                                                                                                                                                                                                                                                                                                                                                                                                  |   |                                                |                             |                                                                        |                      |                                                                    |   |                      |                                                                     |   |                      |                                        |   |               |                        |   |               |                        |   |               |              |
| 4  | bias_feld__4                                                           | Trifft nicht zu                                                                      |                                                                                                                                                                                                                                                                                                                                                                                                                                                                                                                                                                  |   |                                                |                             |                                                                        |                      |                                                                    |   |                      |                                                                     |   |                      |                                        |   |               |                        |   |               |                        |   |               |              |
| 5  | bias_feld__5                                                           | Andere (bitte angeben)                                                               |                                                                                                                                                                                                                                                                                                                                                                                                                                                                                                                                                                  |   |                                                |                             |                                                                        |                      |                                                                    |   |                      |                                                                     |   |                      |                                        |   |               |                        |   |               |                        |   |               |              |
| 6  | bias_feld__6                                                           | Keine der genannten                                                                  |                                                                                                                                                                                                                                                                                                                                                                                                                                                                                                                                                                  |   |                                                |                             |                                                                        |                      |                                                                    |   |                      |                                                                     |   |                      |                                        |   |               |                        |   |               |                        |   |               |              |
| 27 | bias_feld_andere<br>Show the field ONLY if:<br>[bias_feld(5)] = '1'    | Wo kann Ihrer Meinung nach Bias in KI auftreten? Anderen Bereich bitte angeben:      | text                                                                                                                                                                                                                                                                                                                                                                                                                                                                                                                                                             |   |                                                |                             |                                                                        |                      |                                                                    |   |                      |                                                                     |   |                      |                                        |   |               |                        |   |               |                        |   |               |              |
| 28 | ki_trainingsdaten                                                      | Welche Daten nutzen Sie, um KI-Algorithmen zu trainieren?                            | checkbox<br><table border="1"> <tr><td>1</td><td>ki_trainingsdaten__1</td><td>Bilddaten</td></tr> <tr><td>2</td><td>ki_trainingsdaten__2</td><td>Audiodaten</td></tr> <tr><td>3</td><td>ki_trainingsdaten__3</td><td>Textdaten</td></tr> <tr><td>4</td><td>ki_trainingsdaten__4</td><td>Keine Angabe</td></tr> </table>                                                                                                                                                                                                                                          | 1 | ki_trainingsdaten__1                           | Bilddaten                   | 2                                                                      | ki_trainingsdaten__2 | Audiodaten                                                         | 3 | ki_trainingsdaten__3 | Textdaten                                                           | 4 | ki_trainingsdaten__4 | Keine Angabe                           |   |               |                        |   |               |                        |   |               |              |
| 1  | ki_trainingsdaten__1                                                   | Bilddaten                                                                            |                                                                                                                                                                                                                                                                                                                                                                                                                                                                                                                                                                  |   |                                                |                             |                                                                        |                      |                                                                    |   |                      |                                                                     |   |                      |                                        |   |               |                        |   |               |                        |   |               |              |
| 2  | ki_trainingsdaten__2                                                   | Audiodaten                                                                           |                                                                                                                                                                                                                                                                                                                                                                                                                                                                                                                                                                  |   |                                                |                             |                                                                        |                      |                                                                    |   |                      |                                                                     |   |                      |                                        |   |               |                        |   |               |                        |   |               |              |
| 3  | ki_trainingsdaten__3                                                   | Textdaten                                                                            |                                                                                                                                                                                                                                                                                                                                                                                                                                                                                                                                                                  |   |                                                |                             |                                                                        |                      |                                                                    |   |                      |                                                                     |   |                      |                                        |   |               |                        |   |               |                        |   |               |              |
| 4  | ki_trainingsdaten__4                                                   | Keine Angabe                                                                         |                                                                                                                                                                                                                                                                                                                                                                                                                                                                                                                                                                  |   |                                                |                             |                                                                        |                      |                                                                    |   |                      |                                                                     |   |                      |                                        |   |               |                        |   |               |                        |   |               |              |

|    |                                                                                                                                                                                                 |                                                                                                                                                                                        |                                                                                                                                                                                                                                                                                                                                                                                                                                                                                                                                                                                                                                                 |   |                        |                                                                         |                      |                        |                                                |   |                        |                             |   |                        |                                             |   |                    |                        |   |                    |                        |   |                   |              |
|----|-------------------------------------------------------------------------------------------------------------------------------------------------------------------------------------------------|----------------------------------------------------------------------------------------------------------------------------------------------------------------------------------------|-------------------------------------------------------------------------------------------------------------------------------------------------------------------------------------------------------------------------------------------------------------------------------------------------------------------------------------------------------------------------------------------------------------------------------------------------------------------------------------------------------------------------------------------------------------------------------------------------------------------------------------------------|---|------------------------|-------------------------------------------------------------------------|----------------------|------------------------|------------------------------------------------|---|------------------------|-----------------------------|---|------------------------|---------------------------------------------|---|--------------------|------------------------|---|--------------------|------------------------|---|-------------------|--------------|
| 29 | ki_daten_quelle                                                                                                                                                                                 | Woher stammen die von Ihnen verwendeten Daten?                                                                                                                                         | checkbox<br><table border="1"> <tr> <td>1</td> <td>ki_daten_quelle__1</td> <td>Wearables</td> </tr> <tr> <td>2</td> <td>ki_daten_quelle__2</td> <td>Register</td> </tr> <tr> <td>3</td> <td>ki_daten_quelle__3</td> <td>Datenbank aus einem Zentrum</td> </tr> <tr> <td>4</td> <td>ki_daten_quelle__4</td> <td>Multizentrische Datenbank</td> </tr> <tr> <td>5</td> <td>ki_daten_quelle__5</td> <td>Andere (bitte angeben)</td> </tr> <tr> <td>6</td> <td>ki_daten_quelle__6</td> <td>Keine Angabe</td> </tr> </table>                                                                                                                          | 1 | ki_daten_quelle__1     | Wearables                                                               | 2                    | ki_daten_quelle__2     | Register                                       | 3 | ki_daten_quelle__3     | Datenbank aus einem Zentrum | 4 | ki_daten_quelle__4     | Multizentrische Datenbank                   | 5 | ki_daten_quelle__5 | Andere (bitte angeben) | 6 | ki_daten_quelle__6 | Keine Angabe           |   |                   |              |
| 1  | ki_daten_quelle__1                                                                                                                                                                              | Wearables                                                                                                                                                                              |                                                                                                                                                                                                                                                                                                                                                                                                                                                                                                                                                                                                                                                 |   |                        |                                                                         |                      |                        |                                                |   |                        |                             |   |                        |                                             |   |                    |                        |   |                    |                        |   |                   |              |
| 2  | ki_daten_quelle__2                                                                                                                                                                              | Register                                                                                                                                                                               |                                                                                                                                                                                                                                                                                                                                                                                                                                                                                                                                                                                                                                                 |   |                        |                                                                         |                      |                        |                                                |   |                        |                             |   |                        |                                             |   |                    |                        |   |                    |                        |   |                   |              |
| 3  | ki_daten_quelle__3                                                                                                                                                                              | Datenbank aus einem Zentrum                                                                                                                                                            |                                                                                                                                                                                                                                                                                                                                                                                                                                                                                                                                                                                                                                                 |   |                        |                                                                         |                      |                        |                                                |   |                        |                             |   |                        |                                             |   |                    |                        |   |                    |                        |   |                   |              |
| 4  | ki_daten_quelle__4                                                                                                                                                                              | Multizentrische Datenbank                                                                                                                                                              |                                                                                                                                                                                                                                                                                                                                                                                                                                                                                                                                                                                                                                                 |   |                        |                                                                         |                      |                        |                                                |   |                        |                             |   |                        |                                             |   |                    |                        |   |                    |                        |   |                   |              |
| 5  | ki_daten_quelle__5                                                                                                                                                                              | Andere (bitte angeben)                                                                                                                                                                 |                                                                                                                                                                                                                                                                                                                                                                                                                                                                                                                                                                                                                                                 |   |                        |                                                                         |                      |                        |                                                |   |                        |                             |   |                        |                                             |   |                    |                        |   |                    |                        |   |                   |              |
| 6  | ki_daten_quelle__6                                                                                                                                                                              | Keine Angabe                                                                                                                                                                           |                                                                                                                                                                                                                                                                                                                                                                                                                                                                                                                                                                                                                                                 |   |                        |                                                                         |                      |                        |                                                |   |                        |                             |   |                        |                                             |   |                    |                        |   |                    |                        |   |                   |              |
| 30 | ki_daten_quelle_andere<br>Show the field ONLY if:<br>[ki_daten_quelle(5)] = '1'                                                                                                                 | Die verwendeten Daten stammen aus:                                                                                                                                                     | text                                                                                                                                                                                                                                                                                                                                                                                                                                                                                                                                                                                                                                            |   |                        |                                                                         |                      |                        |                                                |   |                        |                             |   |                        |                                             |   |                    |                        |   |                    |                        |   |                   |              |
| 31 | nat_internat_daten                                                                                                                                                                              | Arbeiten Sie mit nationalen oder internationalen Daten?                                                                                                                                | radio<br><table border="1"> <tr> <td>1</td> <td>Nationale Daten</td> </tr> <tr> <td>2</td> <td>Internationale Daten</td> </tr> <tr> <td>3</td> <td>Nationale und internationale Daten</td> </tr> <tr> <td>4</td> <td>Keine Angabe</td> </tr> </table>                                                                                                                                                                                                                                                                                                                                                                                           | 1 | Nationale Daten        | 2                                                                       | Internationale Daten | 3                      | Nationale und internationale Daten             | 4 | Keine Angabe           |                             |   |                        |                                             |   |                    |                        |   |                    |                        |   |                   |              |
| 1  | Nationale Daten                                                                                                                                                                                 |                                                                                                                                                                                        |                                                                                                                                                                                                                                                                                                                                                                                                                                                                                                                                                                                                                                                 |   |                        |                                                                         |                      |                        |                                                |   |                        |                             |   |                        |                                             |   |                    |                        |   |                    |                        |   |                   |              |
| 2  | Internationale Daten                                                                                                                                                                            |                                                                                                                                                                                        |                                                                                                                                                                                                                                                                                                                                                                                                                                                                                                                                                                                                                                                 |   |                        |                                                                         |                      |                        |                                                |   |                        |                             |   |                        |                                             |   |                    |                        |   |                    |                        |   |                   |              |
| 3  | Nationale und internationale Daten                                                                                                                                                              |                                                                                                                                                                                        |                                                                                                                                                                                                                                                                                                                                                                                                                                                                                                                                                                                                                                                 |   |                        |                                                                         |                      |                        |                                                |   |                        |                             |   |                        |                                             |   |                    |                        |   |                    |                        |   |                   |              |
| 4  | Keine Angabe                                                                                                                                                                                    |                                                                                                                                                                                        |                                                                                                                                                                                                                                                                                                                                                                                                                                                                                                                                                                                                                                                 |   |                        |                                                                         |                      |                        |                                                |   |                        |                             |   |                        |                                             |   |                    |                        |   |                    |                        |   |                   |              |
| 32 | standard_daten                                                                                                                                                                                  | Denken Sie, die Verwendung standardisierter Daten (internationale semantische und syntaktische Standards wie HL7 FHIR, SNOMED CT) zum Trainieren der Algorithmen kann Bias verhindern? | radio<br><table border="1"> <tr> <td>1</td> <td>Ja</td> </tr> <tr> <td>2</td> <td>Nein</td> </tr> <tr> <td>3</td> <td>Keine Angabe</td> </tr> </table>                                                                                                                                                                                                                                                                                                                                                                                                                                                                                          | 1 | Ja                     | 2                                                                       | Nein                 | 3                      | Keine Angabe                                   |   |                        |                             |   |                        |                                             |   |                    |                        |   |                    |                        |   |                   |              |
| 1  | Ja                                                                                                                                                                                              |                                                                                                                                                                                        |                                                                                                                                                                                                                                                                                                                                                                                                                                                                                                                                                                                                                                                 |   |                        |                                                                         |                      |                        |                                                |   |                        |                             |   |                        |                                             |   |                    |                        |   |                    |                        |   |                   |              |
| 2  | Nein                                                                                                                                                                                            |                                                                                                                                                                                        |                                                                                                                                                                                                                                                                                                                                                                                                                                                                                                                                                                                                                                                 |   |                        |                                                                         |                      |                        |                                                |   |                        |                             |   |                        |                                             |   |                    |                        |   |                    |                        |   |                   |              |
| 3  | Keine Angabe                                                                                                                                                                                    |                                                                                                                                                                                        |                                                                                                                                                                                                                                                                                                                                                                                                                                                                                                                                                                                                                                                 |   |                        |                                                                         |                      |                        |                                                |   |                        |                             |   |                        |                                             |   |                    |                        |   |                    |                        |   |                   |              |
| 33 | massnahmen_bias                                                                                                                                                                                 | Mit welchen Maßnahmen zur Vermeidung von Bias in der KI sind Sie vertraut?                                                                                                             | checkbox<br><table border="1"> <tr> <td>1</td> <td>massnahmen_bias__1</td> <td>Verwendung von Explainable Artificial Intelligence (XAI)/ Erklärbare KI</td> </tr> <tr> <td>2</td> <td>massnahmen_bias__2</td> <td>Erhebung von soziodemographischen Datenpunkten</td> </tr> <tr> <td>3</td> <td>massnahmen_bias__3</td> <td>Statistische Analyse</td> </tr> <tr> <td>4</td> <td>massnahmen_bias__4</td> <td>Programme zur Bewertung der Fairness von KI</td> </tr> <tr> <td>5</td> <td>massnahmen_bias__5</td> <td>Mir sind keine bekannt</td> </tr> <tr> <td>6</td> <td>massnahmen_bias__6</td> <td>Andere (bitte angeben)</td> </tr> </table> | 1 | massnahmen_bias__1     | Verwendung von Explainable Artificial Intelligence (XAI)/ Erklärbare KI | 2                    | massnahmen_bias__2     | Erhebung von soziodemographischen Datenpunkten | 3 | massnahmen_bias__3     | Statistische Analyse        | 4 | massnahmen_bias__4     | Programme zur Bewertung der Fairness von KI | 5 | massnahmen_bias__5 | Mir sind keine bekannt | 6 | massnahmen_bias__6 | Andere (bitte angeben) |   |                   |              |
| 1  | massnahmen_bias__1                                                                                                                                                                              | Verwendung von Explainable Artificial Intelligence (XAI)/ Erklärbare KI                                                                                                                |                                                                                                                                                                                                                                                                                                                                                                                                                                                                                                                                                                                                                                                 |   |                        |                                                                         |                      |                        |                                                |   |                        |                             |   |                        |                                             |   |                    |                        |   |                    |                        |   |                   |              |
| 2  | massnahmen_bias__2                                                                                                                                                                              | Erhebung von soziodemographischen Datenpunkten                                                                                                                                         |                                                                                                                                                                                                                                                                                                                                                                                                                                                                                                                                                                                                                                                 |   |                        |                                                                         |                      |                        |                                                |   |                        |                             |   |                        |                                             |   |                    |                        |   |                    |                        |   |                   |              |
| 3  | massnahmen_bias__3                                                                                                                                                                              | Statistische Analyse                                                                                                                                                                   |                                                                                                                                                                                                                                                                                                                                                                                                                                                                                                                                                                                                                                                 |   |                        |                                                                         |                      |                        |                                                |   |                        |                             |   |                        |                                             |   |                    |                        |   |                    |                        |   |                   |              |
| 4  | massnahmen_bias__4                                                                                                                                                                              | Programme zur Bewertung der Fairness von KI                                                                                                                                            |                                                                                                                                                                                                                                                                                                                                                                                                                                                                                                                                                                                                                                                 |   |                        |                                                                         |                      |                        |                                                |   |                        |                             |   |                        |                                             |   |                    |                        |   |                    |                        |   |                   |              |
| 5  | massnahmen_bias__5                                                                                                                                                                              | Mir sind keine bekannt                                                                                                                                                                 |                                                                                                                                                                                                                                                                                                                                                                                                                                                                                                                                                                                                                                                 |   |                        |                                                                         |                      |                        |                                                |   |                        |                             |   |                        |                                             |   |                    |                        |   |                    |                        |   |                   |              |
| 6  | massnahmen_bias__6                                                                                                                                                                              | Andere (bitte angeben)                                                                                                                                                                 |                                                                                                                                                                                                                                                                                                                                                                                                                                                                                                                                                                                                                                                 |   |                        |                                                                         |                      |                        |                                                |   |                        |                             |   |                        |                                             |   |                    |                        |   |                    |                        |   |                   |              |
| 34 | massnahmen_bias_andere<br>Show the field ONLY if:<br>[massnahmen_bias(6)] = '1'                                                                                                                 | Mit nennen sie die anderen Maßnahmen zur Vermeidung von Bias in der KI, mit denen Sie vertraut sind:                                                                                   | text                                                                                                                                                                                                                                                                                                                                                                                                                                                                                                                                                                                                                                            |   |                        |                                                                         |                      |                        |                                                |   |                        |                             |   |                        |                                             |   |                    |                        |   |                    |                        |   |                   |              |
| 35 | soziodem_daten                                                                                                                                                                                  | Welche der folgenden soziodemographischen Datenpunkte würden Sie zur Vermeidung von Bias in der KI erheben?                                                                            | checkbox<br><table border="1"> <tr> <td>1</td> <td>soziodem_daten__1</td> <td>Biologisches Geschlecht</td> </tr> <tr> <td>2</td> <td>soziodem_daten__2</td> <td>Soziales Geschlecht</td> </tr> <tr> <td>3</td> <td>soziodem_daten__3</td> <td>Alter</td> </tr> <tr> <td>4</td> <td>soziodem_daten__4</td> <td>Herkunft</td> </tr> <tr> <td>5</td> <td>soziodem_daten__5</td> <td>Andere (bitte angeben)</td> </tr> <tr> <td>6</td> <td>soziodem_daten__6</td> <td>Keine</td> </tr> <tr> <td>7</td> <td>soziodem_daten__7</td> <td>Keine Angabe</td> </tr> </table>                                                                              | 1 | soziodem_daten__1      | Biologisches Geschlecht                                                 | 2                    | soziodem_daten__2      | Soziales Geschlecht                            | 3 | soziodem_daten__3      | Alter                       | 4 | soziodem_daten__4      | Herkunft                                    | 5 | soziodem_daten__5  | Andere (bitte angeben) | 6 | soziodem_daten__6  | Keine                  | 7 | soziodem_daten__7 | Keine Angabe |
| 1  | soziodem_daten__1                                                                                                                                                                               | Biologisches Geschlecht                                                                                                                                                                |                                                                                                                                                                                                                                                                                                                                                                                                                                                                                                                                                                                                                                                 |   |                        |                                                                         |                      |                        |                                                |   |                        |                             |   |                        |                                             |   |                    |                        |   |                    |                        |   |                   |              |
| 2  | soziodem_daten__2                                                                                                                                                                               | Soziales Geschlecht                                                                                                                                                                    |                                                                                                                                                                                                                                                                                                                                                                                                                                                                                                                                                                                                                                                 |   |                        |                                                                         |                      |                        |                                                |   |                        |                             |   |                        |                                             |   |                    |                        |   |                    |                        |   |                   |              |
| 3  | soziodem_daten__3                                                                                                                                                                               | Alter                                                                                                                                                                                  |                                                                                                                                                                                                                                                                                                                                                                                                                                                                                                                                                                                                                                                 |   |                        |                                                                         |                      |                        |                                                |   |                        |                             |   |                        |                                             |   |                    |                        |   |                    |                        |   |                   |              |
| 4  | soziodem_daten__4                                                                                                                                                                               | Herkunft                                                                                                                                                                               |                                                                                                                                                                                                                                                                                                                                                                                                                                                                                                                                                                                                                                                 |   |                        |                                                                         |                      |                        |                                                |   |                        |                             |   |                        |                                             |   |                    |                        |   |                    |                        |   |                   |              |
| 5  | soziodem_daten__5                                                                                                                                                                               | Andere (bitte angeben)                                                                                                                                                                 |                                                                                                                                                                                                                                                                                                                                                                                                                                                                                                                                                                                                                                                 |   |                        |                                                                         |                      |                        |                                                |   |                        |                             |   |                        |                                             |   |                    |                        |   |                    |                        |   |                   |              |
| 6  | soziodem_daten__6                                                                                                                                                                               | Keine                                                                                                                                                                                  |                                                                                                                                                                                                                                                                                                                                                                                                                                                                                                                                                                                                                                                 |   |                        |                                                                         |                      |                        |                                                |   |                        |                             |   |                        |                                             |   |                    |                        |   |                    |                        |   |                   |              |
| 7  | soziodem_daten__7                                                                                                                                                                               | Keine Angabe                                                                                                                                                                           |                                                                                                                                                                                                                                                                                                                                                                                                                                                                                                                                                                                                                                                 |   |                        |                                                                         |                      |                        |                                                |   |                        |                             |   |                        |                                             |   |                    |                        |   |                    |                        |   |                   |              |
| 36 | soziodem_daten_andere<br>Show the field ONLY if:<br>[soziodem_daten(5)] = '1'                                                                                                                   | Welche anderen soziodemographischen Datenpunkte würden Sie zur Vermeidung von Bias in der KI erheben:                                                                                  | text                                                                                                                                                                                                                                                                                                                                                                                                                                                                                                                                                                                                                                            |   |                        |                                                                         |                      |                        |                                                |   |                        |                             |   |                        |                                             |   |                    |                        |   |                    |                        |   |                   |              |
| 37 | soziodem_verwendung<br>Show the field ONLY if:<br>[soziodem_daten(1)] = '1' or [soziodem_daten(2)] = '1' or [soziodem_daten(3)] = '1' or [soziodem_daten(4)] = '1' or [soziodem_daten(5)] = '1' | Wofür würden Sie die von Ihnen genannten soziodemographischen Datenpunkte verwenden?                                                                                                   | checkbox<br><table border="1"> <tr> <td>1</td> <td>soziodem_verwendung__1</td> <td>Modellierung</td> </tr> <tr> <td>2</td> <td>soziodem_verwendung__2</td> <td>Analyse</td> </tr> <tr> <td>3</td> <td>soziodem_verwendung__3</td> <td>Datenerhebung</td> </tr> <tr> <td>4</td> <td>soziodem_verwendung__4</td> <td>Keine Angabe</td> </tr> </table>                                                                                                                                                                                                                                                                                             | 1 | soziodem_verwendung__1 | Modellierung                                                            | 2                    | soziodem_verwendung__2 | Analyse                                        | 3 | soziodem_verwendung__3 | Datenerhebung               | 4 | soziodem_verwendung__4 | Keine Angabe                                |   |                    |                        |   |                    |                        |   |                   |              |
| 1  | soziodem_verwendung__1                                                                                                                                                                          | Modellierung                                                                                                                                                                           |                                                                                                                                                                                                                                                                                                                                                                                                                                                                                                                                                                                                                                                 |   |                        |                                                                         |                      |                        |                                                |   |                        |                             |   |                        |                                             |   |                    |                        |   |                    |                        |   |                   |              |
| 2  | soziodem_verwendung__2                                                                                                                                                                          | Analyse                                                                                                                                                                                |                                                                                                                                                                                                                                                                                                                                                                                                                                                                                                                                                                                                                                                 |   |                        |                                                                         |                      |                        |                                                |   |                        |                             |   |                        |                                             |   |                    |                        |   |                    |                        |   |                   |              |
| 3  | soziodem_verwendung__3                                                                                                                                                                          | Datenerhebung                                                                                                                                                                          |                                                                                                                                                                                                                                                                                                                                                                                                                                                                                                                                                                                                                                                 |   |                        |                                                                         |                      |                        |                                                |   |                        |                             |   |                        |                                             |   |                    |                        |   |                    |                        |   |                   |              |
| 4  | soziodem_verwendung__4                                                                                                                                                                          | Keine Angabe                                                                                                                                                                           |                                                                                                                                                                                                                                                                                                                                                                                                                                                                                                                                                                                                                                                 |   |                        |                                                                         |                      |                        |                                                |   |                        |                             |   |                        |                                             |   |                    |                        |   |                    |                        |   |                   |              |

|    |                                                                                                                                                                 |                                                                                                                                                            |                                                                                                                                                                                                                                                                                                                                                                                                                                                                                                                                                                                                                                                                         |   |                      |                      |            |                      |                                                           |   |                      |                             |           |                      |                        |   |                      |                                            |   |                      |                        |   |                      |              |
|----|-----------------------------------------------------------------------------------------------------------------------------------------------------------------|------------------------------------------------------------------------------------------------------------------------------------------------------------|-------------------------------------------------------------------------------------------------------------------------------------------------------------------------------------------------------------------------------------------------------------------------------------------------------------------------------------------------------------------------------------------------------------------------------------------------------------------------------------------------------------------------------------------------------------------------------------------------------------------------------------------------------------------------|---|----------------------|----------------------|------------|----------------------|-----------------------------------------------------------|---|----------------------|-----------------------------|-----------|----------------------|------------------------|---|----------------------|--------------------------------------------|---|----------------------|------------------------|---|----------------------|--------------|
| 38 | fairness_ki                                                                                                                                                     | Wie schätzen Sie die Fairness von KI in Ihrem Bereich der KI-Entwicklung ein?<br>(Werden bestimmte Personengruppen nicht gleich berücksichtigt/behandelt?) | radio<br><table border="1"> <tr><td>1</td><td>Gar nicht fair</td></tr> <tr><td>2</td><td>Kaum fair</td></tr> <tr><td>3</td><td>Mäßig fair</td></tr> <tr><td>4</td><td>Fair</td></tr> <tr><td>5</td><td>Sehr fair</td></tr> <tr><td>6</td><td>Keine Angabe</td></tr> </table>                                                                                                                                                                                                                                                                                                                                                                                            | 1 | Gar nicht fair       | 2                    | Kaum fair  | 3                    | Mäßig fair                                                | 4 | Fair                 | 5                           | Sehr fair | 6                    | Keine Angabe           |   |                      |                                            |   |                      |                        |   |                      |              |
| 1  | Gar nicht fair                                                                                                                                                  |                                                                                                                                                            |                                                                                                                                                                                                                                                                                                                                                                                                                                                                                                                                                                                                                                                                         |   |                      |                      |            |                      |                                                           |   |                      |                             |           |                      |                        |   |                      |                                            |   |                      |                        |   |                      |              |
| 2  | Kaum fair                                                                                                                                                       |                                                                                                                                                            |                                                                                                                                                                                                                                                                                                                                                                                                                                                                                                                                                                                                                                                                         |   |                      |                      |            |                      |                                                           |   |                      |                             |           |                      |                        |   |                      |                                            |   |                      |                        |   |                      |              |
| 3  | Mäßig fair                                                                                                                                                      |                                                                                                                                                            |                                                                                                                                                                                                                                                                                                                                                                                                                                                                                                                                                                                                                                                                         |   |                      |                      |            |                      |                                                           |   |                      |                             |           |                      |                        |   |                      |                                            |   |                      |                        |   |                      |              |
| 4  | Fair                                                                                                                                                            |                                                                                                                                                            |                                                                                                                                                                                                                                                                                                                                                                                                                                                                                                                                                                                                                                                                         |   |                      |                      |            |                      |                                                           |   |                      |                             |           |                      |                        |   |                      |                                            |   |                      |                        |   |                      |              |
| 5  | Sehr fair                                                                                                                                                       |                                                                                                                                                            |                                                                                                                                                                                                                                                                                                                                                                                                                                                                                                                                                                                                                                                                         |   |                      |                      |            |                      |                                                           |   |                      |                             |           |                      |                        |   |                      |                                            |   |                      |                        |   |                      |              |
| 6  | Keine Angabe                                                                                                                                                    |                                                                                                                                                            |                                                                                                                                                                                                                                                                                                                                                                                                                                                                                                                                                                                                                                                                         |   |                      |                      |            |                      |                                                           |   |                      |                             |           |                      |                        |   |                      |                                            |   |                      |                        |   |                      |              |
| 39 | fairness_ki_block<br>Show the field ONLY if:<br>[fairness_ki] = '1' or [fairness_ki] = '2' or [fairness_ki] = '3' or [fairness_ki] = '4' or [fairness_ki] = '6' | Was verhindert Ihrer Meinung nach faire KI in Ihrem Anwendungsbereich?                                                                                     | checkbox<br><table border="1"> <tr><td>1</td><td>fairness_ki_block__1</td><td>Mangel an Ressourcen</td></tr> <tr><td>2</td><td>fairness_ki_block__2</td><td>Mangelnde Unterstützung von Vorgesetzten/ der Einrichtung</td></tr> <tr><td>3</td><td>fairness_ki_block__3</td><td>Mangelndes Wissen/ Know-how</td></tr> <tr><td>4</td><td>fairness_ki_block__4</td><td>Mangel an fairen Daten</td></tr> <tr><td>5</td><td>fairness_ki_block__5</td><td>Mangel an Guidelines/Vorgaben für faire KI</td></tr> <tr><td>6</td><td>fairness_ki_block__6</td><td>Andere (bitte angeben)</td></tr> <tr><td>7</td><td>fairness_ki_block__7</td><td>Keine Angabe</td></tr> </table> | 1 | fairness_ki_block__1 | Mangel an Ressourcen | 2          | fairness_ki_block__2 | Mangelnde Unterstützung von Vorgesetzten/ der Einrichtung | 3 | fairness_ki_block__3 | Mangelndes Wissen/ Know-how | 4         | fairness_ki_block__4 | Mangel an fairen Daten | 5 | fairness_ki_block__5 | Mangel an Guidelines/Vorgaben für faire KI | 6 | fairness_ki_block__6 | Andere (bitte angeben) | 7 | fairness_ki_block__7 | Keine Angabe |
| 1  | fairness_ki_block__1                                                                                                                                            | Mangel an Ressourcen                                                                                                                                       |                                                                                                                                                                                                                                                                                                                                                                                                                                                                                                                                                                                                                                                                         |   |                      |                      |            |                      |                                                           |   |                      |                             |           |                      |                        |   |                      |                                            |   |                      |                        |   |                      |              |
| 2  | fairness_ki_block__2                                                                                                                                            | Mangelnde Unterstützung von Vorgesetzten/ der Einrichtung                                                                                                  |                                                                                                                                                                                                                                                                                                                                                                                                                                                                                                                                                                                                                                                                         |   |                      |                      |            |                      |                                                           |   |                      |                             |           |                      |                        |   |                      |                                            |   |                      |                        |   |                      |              |
| 3  | fairness_ki_block__3                                                                                                                                            | Mangelndes Wissen/ Know-how                                                                                                                                |                                                                                                                                                                                                                                                                                                                                                                                                                                                                                                                                                                                                                                                                         |   |                      |                      |            |                      |                                                           |   |                      |                             |           |                      |                        |   |                      |                                            |   |                      |                        |   |                      |              |
| 4  | fairness_ki_block__4                                                                                                                                            | Mangel an fairen Daten                                                                                                                                     |                                                                                                                                                                                                                                                                                                                                                                                                                                                                                                                                                                                                                                                                         |   |                      |                      |            |                      |                                                           |   |                      |                             |           |                      |                        |   |                      |                                            |   |                      |                        |   |                      |              |
| 5  | fairness_ki_block__5                                                                                                                                            | Mangel an Guidelines/Vorgaben für faire KI                                                                                                                 |                                                                                                                                                                                                                                                                                                                                                                                                                                                                                                                                                                                                                                                                         |   |                      |                      |            |                      |                                                           |   |                      |                             |           |                      |                        |   |                      |                                            |   |                      |                        |   |                      |              |
| 6  | fairness_ki_block__6                                                                                                                                            | Andere (bitte angeben)                                                                                                                                     |                                                                                                                                                                                                                                                                                                                                                                                                                                                                                                                                                                                                                                                                         |   |                      |                      |            |                      |                                                           |   |                      |                             |           |                      |                        |   |                      |                                            |   |                      |                        |   |                      |              |
| 7  | fairness_ki_block__7                                                                                                                                            | Keine Angabe                                                                                                                                               |                                                                                                                                                                                                                                                                                                                                                                                                                                                                                                                                                                                                                                                                         |   |                      |                      |            |                      |                                                           |   |                      |                             |           |                      |                        |   |                      |                                            |   |                      |                        |   |                      |              |
| 40 | fairness_ki_block_andere<br>Show the field ONLY if:<br>[fairness_ki_block(6)] = '1'                                                                             | Welche anderen Faktoren verhindern Ihrer Meinung nach faire KI in Ihrem Anwendungsbereich:                                                                 | text                                                                                                                                                                                                                                                                                                                                                                                                                                                                                                                                                                                                                                                                    |   |                      |                      |            |                      |                                                           |   |                      |                             |           |                      |                        |   |                      |                                            |   |                      |                        |   |                      |              |
| 41 | kommentar_1                                                                                                                                                     | Haben Sie generelle Anmerkungen zum Fragebogen?                                                                                                            | notes                                                                                                                                                                                                                                                                                                                                                                                                                                                                                                                                                                                                                                                                   |   |                      |                      |            |                      |                                                           |   |                      |                             |           |                      |                        |   |                      |                                            |   |                      |                        |   |                      |              |
| 42 | fragebogen_fairness_und_ki_2_complete                                                                                                                           | Section Header: <i>Form Status</i><br>Complete?                                                                                                            | dropdown<br><table border="1"> <tr><td>0</td><td>Incomplete</td></tr> <tr><td>1</td><td>Unverified</td></tr> <tr><td>2</td><td>Complete</td></tr> </table>                                                                                                                                                                                                                                                                                                                                                                                                                                                                                                              | 0 | Incomplete           | 1                    | Unverified | 2                    | Complete                                                  |   |                      |                             |           |                      |                        |   |                      |                                            |   |                      |                        |   |                      |              |
| 0  | Incomplete                                                                                                                                                      |                                                                                                                                                            |                                                                                                                                                                                                                                                                                                                                                                                                                                                                                                                                                                                                                                                                         |   |                      |                      |            |                      |                                                           |   |                      |                             |           |                      |                        |   |                      |                                            |   |                      |                        |   |                      |              |
| 1  | Unverified                                                                                                                                                      |                                                                                                                                                            |                                                                                                                                                                                                                                                                                                                                                                                                                                                                                                                                                                                                                                                                         |   |                      |                      |            |                      |                                                           |   |                      |                             |           |                      |                        |   |                      |                                            |   |                      |                        |   |                      |              |
| 2  | Complete                                                                                                                                                        |                                                                                                                                                            |                                                                                                                                                                                                                                                                                                                                                                                                                                                                                                                                                                                                                                                                         |   |                      |                      |            |                      |                                                           |   |                      |                             |           |                      |                        |   |                      |                                            |   |                      |                        |   |                      |              |

Instrument: **Questionnaire Fairness And Ai** (questionnaire\_fairness\_and\_ai)

 Enabled as survey

[^ Collapse](#)

|    |                                                                |                                       |                                                                                                                                                                                                                                                                                                                                                       |   |         |   |          |   |                                           |   |                  |   |                        |   |               |
|----|----------------------------------------------------------------|---------------------------------------|-------------------------------------------------------------------------------------------------------------------------------------------------------------------------------------------------------------------------------------------------------------------------------------------------------------------------------------------------------|---|---------|---|----------|---|-------------------------------------------|---|------------------|---|------------------------|---|---------------|
| 43 | quelle_1                                                       | How did this questionnaire reach you? | radio<br><table border="1"> <tr><td>1</td><td>Twitter</td></tr> <tr><td>2</td><td>Linkedin</td></tr> <tr><td>3</td><td>Email distribution list of my institution</td></tr> <tr><td>4</td><td>Personal contact</td></tr> <tr><td>5</td><td>Other (please specify)</td></tr> <tr><td>6</td><td>Not specified</td></tr> </table><br>Custom alignment: LV | 1 | Twitter | 2 | Linkedin | 3 | Email distribution list of my institution | 4 | Personal contact | 5 | Other (please specify) | 6 | Not specified |
| 1  | Twitter                                                        |                                       |                                                                                                                                                                                                                                                                                                                                                       |   |         |   |          |   |                                           |   |                  |   |                        |   |               |
| 2  | Linkedin                                                       |                                       |                                                                                                                                                                                                                                                                                                                                                       |   |         |   |          |   |                                           |   |                  |   |                        |   |               |
| 3  | Email distribution list of my institution                      |                                       |                                                                                                                                                                                                                                                                                                                                                       |   |         |   |          |   |                                           |   |                  |   |                        |   |               |
| 4  | Personal contact                                               |                                       |                                                                                                                                                                                                                                                                                                                                                       |   |         |   |          |   |                                           |   |                  |   |                        |   |               |
| 5  | Other (please specify)                                         |                                       |                                                                                                                                                                                                                                                                                                                                                       |   |         |   |          |   |                                           |   |                  |   |                        |   |               |
| 6  | Not specified                                                  |                                       |                                                                                                                                                                                                                                                                                                                                                       |   |         |   |          |   |                                           |   |                  |   |                        |   |               |
| 44 | quelle_andere_1<br>Show the field ONLY if:<br>[quelle_1] = '5' | How did this questionnaire reach you: | text                                                                                                                                                                                                                                                                                                                                                  |   |         |   |          |   |                                           |   |                  |   |                        |   |               |

|    |                                                                           |                                               |                                                                                                                                                                                                                                                                                                                                                                                                                                                                                                                                                                                                                                                                                                                                                                                                                                                                                                                                                                                                                                                                                                                                                                           |   |         |   |               |   |          |   |                        |   |               |   |             |   |         |   |         |   |        |    |          |    |       |    |         |    |         |    |        |    |         |    |        |    |           |    |       |    |        |    |          |    |          |    |                |    |         |    |        |    |          |    |         |    |         |    |                        |    |               |
|----|---------------------------------------------------------------------------|-----------------------------------------------|---------------------------------------------------------------------------------------------------------------------------------------------------------------------------------------------------------------------------------------------------------------------------------------------------------------------------------------------------------------------------------------------------------------------------------------------------------------------------------------------------------------------------------------------------------------------------------------------------------------------------------------------------------------------------------------------------------------------------------------------------------------------------------------------------------------------------------------------------------------------------------------------------------------------------------------------------------------------------------------------------------------------------------------------------------------------------------------------------------------------------------------------------------------------------|---|---------|---|---------------|---|----------|---|------------------------|---|---------------|---|-------------|---|---------|---|---------|---|--------|----|----------|----|-------|----|---------|----|---------|----|--------|----|---------|----|--------|----|-----------|----|-------|----|--------|----|----------|----|----------|----|----------------|----|---------|----|--------|----|----------|----|---------|----|---------|----|------------------------|----|---------------|
| 45 | arbeitsland_1                                                             | Which country do you work in?                 | dropdown <table border="1"> <tr><td>1</td><td>Belgium</td></tr> <tr><td>2</td><td>Germany</td></tr> <tr><td>3</td><td>France</td></tr> <tr><td>4</td><td>Italy</td></tr> <tr><td>5</td><td>Luxembourg</td></tr> <tr><td>6</td><td>Netherlands</td></tr> <tr><td>7</td><td>Denmark</td></tr> <tr><td>8</td><td>Ireland</td></tr> <tr><td>9</td><td>Greece</td></tr> <tr><td>10</td><td>Portugal</td></tr> <tr><td>11</td><td>Spain</td></tr> <tr><td>12</td><td>Finland</td></tr> <tr><td>13</td><td>Austria</td></tr> <tr><td>14</td><td>Sweden</td></tr> <tr><td>15</td><td>Estonia</td></tr> <tr><td>16</td><td>Latvia</td></tr> <tr><td>17</td><td>Lithuania</td></tr> <tr><td>18</td><td>Malta</td></tr> <tr><td>19</td><td>Poland</td></tr> <tr><td>20</td><td>Slovakia</td></tr> <tr><td>21</td><td>Slovenia</td></tr> <tr><td>22</td><td>Czech Republic</td></tr> <tr><td>23</td><td>Hungary</td></tr> <tr><td>24</td><td>Cyprus</td></tr> <tr><td>25</td><td>Bulgaria</td></tr> <tr><td>26</td><td>Romania</td></tr> <tr><td>27</td><td>Croatia</td></tr> <tr><td>28</td><td>Other (please specify)</td></tr> <tr><td>29</td><td>Not specified</td></tr> </table> | 1 | Belgium | 2 | Germany       | 3 | France   | 4 | Italy                  | 5 | Luxembourg    | 6 | Netherlands | 7 | Denmark | 8 | Ireland | 9 | Greece | 10 | Portugal | 11 | Spain | 12 | Finland | 13 | Austria | 14 | Sweden | 15 | Estonia | 16 | Latvia | 17 | Lithuania | 18 | Malta | 19 | Poland | 20 | Slovakia | 21 | Slovenia | 22 | Czech Republic | 23 | Hungary | 24 | Cyprus | 25 | Bulgaria | 26 | Romania | 27 | Croatia | 28 | Other (please specify) | 29 | Not specified |
| 1  | Belgium                                                                   |                                               |                                                                                                                                                                                                                                                                                                                                                                                                                                                                                                                                                                                                                                                                                                                                                                                                                                                                                                                                                                                                                                                                                                                                                                           |   |         |   |               |   |          |   |                        |   |               |   |             |   |         |   |         |   |        |    |          |    |       |    |         |    |         |    |        |    |         |    |        |    |           |    |       |    |        |    |          |    |          |    |                |    |         |    |        |    |          |    |         |    |         |    |                        |    |               |
| 2  | Germany                                                                   |                                               |                                                                                                                                                                                                                                                                                                                                                                                                                                                                                                                                                                                                                                                                                                                                                                                                                                                                                                                                                                                                                                                                                                                                                                           |   |         |   |               |   |          |   |                        |   |               |   |             |   |         |   |         |   |        |    |          |    |       |    |         |    |         |    |        |    |         |    |        |    |           |    |       |    |        |    |          |    |          |    |                |    |         |    |        |    |          |    |         |    |         |    |                        |    |               |
| 3  | France                                                                    |                                               |                                                                                                                                                                                                                                                                                                                                                                                                                                                                                                                                                                                                                                                                                                                                                                                                                                                                                                                                                                                                                                                                                                                                                                           |   |         |   |               |   |          |   |                        |   |               |   |             |   |         |   |         |   |        |    |          |    |       |    |         |    |         |    |        |    |         |    |        |    |           |    |       |    |        |    |          |    |          |    |                |    |         |    |        |    |          |    |         |    |         |    |                        |    |               |
| 4  | Italy                                                                     |                                               |                                                                                                                                                                                                                                                                                                                                                                                                                                                                                                                                                                                                                                                                                                                                                                                                                                                                                                                                                                                                                                                                                                                                                                           |   |         |   |               |   |          |   |                        |   |               |   |             |   |         |   |         |   |        |    |          |    |       |    |         |    |         |    |        |    |         |    |        |    |           |    |       |    |        |    |          |    |          |    |                |    |         |    |        |    |          |    |         |    |         |    |                        |    |               |
| 5  | Luxembourg                                                                |                                               |                                                                                                                                                                                                                                                                                                                                                                                                                                                                                                                                                                                                                                                                                                                                                                                                                                                                                                                                                                                                                                                                                                                                                                           |   |         |   |               |   |          |   |                        |   |               |   |             |   |         |   |         |   |        |    |          |    |       |    |         |    |         |    |        |    |         |    |        |    |           |    |       |    |        |    |          |    |          |    |                |    |         |    |        |    |          |    |         |    |         |    |                        |    |               |
| 6  | Netherlands                                                               |                                               |                                                                                                                                                                                                                                                                                                                                                                                                                                                                                                                                                                                                                                                                                                                                                                                                                                                                                                                                                                                                                                                                                                                                                                           |   |         |   |               |   |          |   |                        |   |               |   |             |   |         |   |         |   |        |    |          |    |       |    |         |    |         |    |        |    |         |    |        |    |           |    |       |    |        |    |          |    |          |    |                |    |         |    |        |    |          |    |         |    |         |    |                        |    |               |
| 7  | Denmark                                                                   |                                               |                                                                                                                                                                                                                                                                                                                                                                                                                                                                                                                                                                                                                                                                                                                                                                                                                                                                                                                                                                                                                                                                                                                                                                           |   |         |   |               |   |          |   |                        |   |               |   |             |   |         |   |         |   |        |    |          |    |       |    |         |    |         |    |        |    |         |    |        |    |           |    |       |    |        |    |          |    |          |    |                |    |         |    |        |    |          |    |         |    |         |    |                        |    |               |
| 8  | Ireland                                                                   |                                               |                                                                                                                                                                                                                                                                                                                                                                                                                                                                                                                                                                                                                                                                                                                                                                                                                                                                                                                                                                                                                                                                                                                                                                           |   |         |   |               |   |          |   |                        |   |               |   |             |   |         |   |         |   |        |    |          |    |       |    |         |    |         |    |        |    |         |    |        |    |           |    |       |    |        |    |          |    |          |    |                |    |         |    |        |    |          |    |         |    |         |    |                        |    |               |
| 9  | Greece                                                                    |                                               |                                                                                                                                                                                                                                                                                                                                                                                                                                                                                                                                                                                                                                                                                                                                                                                                                                                                                                                                                                                                                                                                                                                                                                           |   |         |   |               |   |          |   |                        |   |               |   |             |   |         |   |         |   |        |    |          |    |       |    |         |    |         |    |        |    |         |    |        |    |           |    |       |    |        |    |          |    |          |    |                |    |         |    |        |    |          |    |         |    |         |    |                        |    |               |
| 10 | Portugal                                                                  |                                               |                                                                                                                                                                                                                                                                                                                                                                                                                                                                                                                                                                                                                                                                                                                                                                                                                                                                                                                                                                                                                                                                                                                                                                           |   |         |   |               |   |          |   |                        |   |               |   |             |   |         |   |         |   |        |    |          |    |       |    |         |    |         |    |        |    |         |    |        |    |           |    |       |    |        |    |          |    |          |    |                |    |         |    |        |    |          |    |         |    |         |    |                        |    |               |
| 11 | Spain                                                                     |                                               |                                                                                                                                                                                                                                                                                                                                                                                                                                                                                                                                                                                                                                                                                                                                                                                                                                                                                                                                                                                                                                                                                                                                                                           |   |         |   |               |   |          |   |                        |   |               |   |             |   |         |   |         |   |        |    |          |    |       |    |         |    |         |    |        |    |         |    |        |    |           |    |       |    |        |    |          |    |          |    |                |    |         |    |        |    |          |    |         |    |         |    |                        |    |               |
| 12 | Finland                                                                   |                                               |                                                                                                                                                                                                                                                                                                                                                                                                                                                                                                                                                                                                                                                                                                                                                                                                                                                                                                                                                                                                                                                                                                                                                                           |   |         |   |               |   |          |   |                        |   |               |   |             |   |         |   |         |   |        |    |          |    |       |    |         |    |         |    |        |    |         |    |        |    |           |    |       |    |        |    |          |    |          |    |                |    |         |    |        |    |          |    |         |    |         |    |                        |    |               |
| 13 | Austria                                                                   |                                               |                                                                                                                                                                                                                                                                                                                                                                                                                                                                                                                                                                                                                                                                                                                                                                                                                                                                                                                                                                                                                                                                                                                                                                           |   |         |   |               |   |          |   |                        |   |               |   |             |   |         |   |         |   |        |    |          |    |       |    |         |    |         |    |        |    |         |    |        |    |           |    |       |    |        |    |          |    |          |    |                |    |         |    |        |    |          |    |         |    |         |    |                        |    |               |
| 14 | Sweden                                                                    |                                               |                                                                                                                                                                                                                                                                                                                                                                                                                                                                                                                                                                                                                                                                                                                                                                                                                                                                                                                                                                                                                                                                                                                                                                           |   |         |   |               |   |          |   |                        |   |               |   |             |   |         |   |         |   |        |    |          |    |       |    |         |    |         |    |        |    |         |    |        |    |           |    |       |    |        |    |          |    |          |    |                |    |         |    |        |    |          |    |         |    |         |    |                        |    |               |
| 15 | Estonia                                                                   |                                               |                                                                                                                                                                                                                                                                                                                                                                                                                                                                                                                                                                                                                                                                                                                                                                                                                                                                                                                                                                                                                                                                                                                                                                           |   |         |   |               |   |          |   |                        |   |               |   |             |   |         |   |         |   |        |    |          |    |       |    |         |    |         |    |        |    |         |    |        |    |           |    |       |    |        |    |          |    |          |    |                |    |         |    |        |    |          |    |         |    |         |    |                        |    |               |
| 16 | Latvia                                                                    |                                               |                                                                                                                                                                                                                                                                                                                                                                                                                                                                                                                                                                                                                                                                                                                                                                                                                                                                                                                                                                                                                                                                                                                                                                           |   |         |   |               |   |          |   |                        |   |               |   |             |   |         |   |         |   |        |    |          |    |       |    |         |    |         |    |        |    |         |    |        |    |           |    |       |    |        |    |          |    |          |    |                |    |         |    |        |    |          |    |         |    |         |    |                        |    |               |
| 17 | Lithuania                                                                 |                                               |                                                                                                                                                                                                                                                                                                                                                                                                                                                                                                                                                                                                                                                                                                                                                                                                                                                                                                                                                                                                                                                                                                                                                                           |   |         |   |               |   |          |   |                        |   |               |   |             |   |         |   |         |   |        |    |          |    |       |    |         |    |         |    |        |    |         |    |        |    |           |    |       |    |        |    |          |    |          |    |                |    |         |    |        |    |          |    |         |    |         |    |                        |    |               |
| 18 | Malta                                                                     |                                               |                                                                                                                                                                                                                                                                                                                                                                                                                                                                                                                                                                                                                                                                                                                                                                                                                                                                                                                                                                                                                                                                                                                                                                           |   |         |   |               |   |          |   |                        |   |               |   |             |   |         |   |         |   |        |    |          |    |       |    |         |    |         |    |        |    |         |    |        |    |           |    |       |    |        |    |          |    |          |    |                |    |         |    |        |    |          |    |         |    |         |    |                        |    |               |
| 19 | Poland                                                                    |                                               |                                                                                                                                                                                                                                                                                                                                                                                                                                                                                                                                                                                                                                                                                                                                                                                                                                                                                                                                                                                                                                                                                                                                                                           |   |         |   |               |   |          |   |                        |   |               |   |             |   |         |   |         |   |        |    |          |    |       |    |         |    |         |    |        |    |         |    |        |    |           |    |       |    |        |    |          |    |          |    |                |    |         |    |        |    |          |    |         |    |         |    |                        |    |               |
| 20 | Slovakia                                                                  |                                               |                                                                                                                                                                                                                                                                                                                                                                                                                                                                                                                                                                                                                                                                                                                                                                                                                                                                                                                                                                                                                                                                                                                                                                           |   |         |   |               |   |          |   |                        |   |               |   |             |   |         |   |         |   |        |    |          |    |       |    |         |    |         |    |        |    |         |    |        |    |           |    |       |    |        |    |          |    |          |    |                |    |         |    |        |    |          |    |         |    |         |    |                        |    |               |
| 21 | Slovenia                                                                  |                                               |                                                                                                                                                                                                                                                                                                                                                                                                                                                                                                                                                                                                                                                                                                                                                                                                                                                                                                                                                                                                                                                                                                                                                                           |   |         |   |               |   |          |   |                        |   |               |   |             |   |         |   |         |   |        |    |          |    |       |    |         |    |         |    |        |    |         |    |        |    |           |    |       |    |        |    |          |    |          |    |                |    |         |    |        |    |          |    |         |    |         |    |                        |    |               |
| 22 | Czech Republic                                                            |                                               |                                                                                                                                                                                                                                                                                                                                                                                                                                                                                                                                                                                                                                                                                                                                                                                                                                                                                                                                                                                                                                                                                                                                                                           |   |         |   |               |   |          |   |                        |   |               |   |             |   |         |   |         |   |        |    |          |    |       |    |         |    |         |    |        |    |         |    |        |    |           |    |       |    |        |    |          |    |          |    |                |    |         |    |        |    |          |    |         |    |         |    |                        |    |               |
| 23 | Hungary                                                                   |                                               |                                                                                                                                                                                                                                                                                                                                                                                                                                                                                                                                                                                                                                                                                                                                                                                                                                                                                                                                                                                                                                                                                                                                                                           |   |         |   |               |   |          |   |                        |   |               |   |             |   |         |   |         |   |        |    |          |    |       |    |         |    |         |    |        |    |         |    |        |    |           |    |       |    |        |    |          |    |          |    |                |    |         |    |        |    |          |    |         |    |         |    |                        |    |               |
| 24 | Cyprus                                                                    |                                               |                                                                                                                                                                                                                                                                                                                                                                                                                                                                                                                                                                                                                                                                                                                                                                                                                                                                                                                                                                                                                                                                                                                                                                           |   |         |   |               |   |          |   |                        |   |               |   |             |   |         |   |         |   |        |    |          |    |       |    |         |    |         |    |        |    |         |    |        |    |           |    |       |    |        |    |          |    |          |    |                |    |         |    |        |    |          |    |         |    |         |    |                        |    |               |
| 25 | Bulgaria                                                                  |                                               |                                                                                                                                                                                                                                                                                                                                                                                                                                                                                                                                                                                                                                                                                                                                                                                                                                                                                                                                                                                                                                                                                                                                                                           |   |         |   |               |   |          |   |                        |   |               |   |             |   |         |   |         |   |        |    |          |    |       |    |         |    |         |    |        |    |         |    |        |    |           |    |       |    |        |    |          |    |          |    |                |    |         |    |        |    |          |    |         |    |         |    |                        |    |               |
| 26 | Romania                                                                   |                                               |                                                                                                                                                                                                                                                                                                                                                                                                                                                                                                                                                                                                                                                                                                                                                                                                                                                                                                                                                                                                                                                                                                                                                                           |   |         |   |               |   |          |   |                        |   |               |   |             |   |         |   |         |   |        |    |          |    |       |    |         |    |         |    |        |    |         |    |        |    |           |    |       |    |        |    |          |    |          |    |                |    |         |    |        |    |          |    |         |    |         |    |                        |    |               |
| 27 | Croatia                                                                   |                                               |                                                                                                                                                                                                                                                                                                                                                                                                                                                                                                                                                                                                                                                                                                                                                                                                                                                                                                                                                                                                                                                                                                                                                                           |   |         |   |               |   |          |   |                        |   |               |   |             |   |         |   |         |   |        |    |          |    |       |    |         |    |         |    |        |    |         |    |        |    |           |    |       |    |        |    |          |    |          |    |                |    |         |    |        |    |          |    |         |    |         |    |                        |    |               |
| 28 | Other (please specify)                                                    |                                               |                                                                                                                                                                                                                                                                                                                                                                                                                                                                                                                                                                                                                                                                                                                                                                                                                                                                                                                                                                                                                                                                                                                                                                           |   |         |   |               |   |          |   |                        |   |               |   |             |   |         |   |         |   |        |    |          |    |       |    |         |    |         |    |        |    |         |    |        |    |           |    |       |    |        |    |          |    |          |    |                |    |         |    |        |    |          |    |         |    |         |    |                        |    |               |
| 29 | Not specified                                                             |                                               |                                                                                                                                                                                                                                                                                                                                                                                                                                                                                                                                                                                                                                                                                                                                                                                                                                                                                                                                                                                                                                                                                                                                                                           |   |         |   |               |   |          |   |                        |   |               |   |             |   |         |   |         |   |        |    |          |    |       |    |         |    |         |    |        |    |         |    |        |    |           |    |       |    |        |    |          |    |          |    |                |    |         |    |        |    |          |    |         |    |         |    |                        |    |               |
| 46 | arbeitsland_andere_1<br>Show the field ONLY if:<br>[arbeitsland_1] = "28" | Which country do you work in:                 | text                                                                                                                                                                                                                                                                                                                                                                                                                                                                                                                                                                                                                                                                                                                                                                                                                                                                                                                                                                                                                                                                                                                                                                      |   |         |   |               |   |          |   |                        |   |               |   |             |   |         |   |         |   |        |    |          |    |       |    |         |    |         |    |        |    |         |    |        |    |           |    |       |    |        |    |          |    |          |    |                |    |         |    |        |    |          |    |         |    |         |    |                        |    |               |
| 47 | arbeitgeber_1                                                             | What is the name of your company/institution? | text                                                                                                                                                                                                                                                                                                                                                                                                                                                                                                                                                                                                                                                                                                                                                                                                                                                                                                                                                                                                                                                                                                                                                                      |   |         |   |               |   |          |   |                        |   |               |   |             |   |         |   |         |   |        |    |          |    |       |    |         |    |         |    |        |    |         |    |        |    |           |    |       |    |        |    |          |    |          |    |                |    |         |    |        |    |          |    |         |    |         |    |                        |    |               |
| 48 | geschlecht_1                                                              | What is your gender?                          | radio <table border="1"> <tr><td>1</td><td>Female</td></tr> <tr><td>2</td><td>Male</td></tr> <tr><td>3</td><td>Diverse</td></tr> <tr><td>4</td><td>Undefined</td></tr> <tr><td>5</td><td>Not specified</td></tr> </table><br>Custom alignment: LH                                                                                                                                                                                                                                                                                                                                                                                                                                                                                                                                                                                                                                                                                                                                                                                                                                                                                                                         | 1 | Female  | 2 | Male          | 3 | Diverse  | 4 | Undefined              | 5 | Not specified |   |             |   |         |   |         |   |        |    |          |    |       |    |         |    |         |    |        |    |         |    |        |    |           |    |       |    |        |    |          |    |          |    |                |    |         |    |        |    |          |    |         |    |         |    |                        |    |               |
| 1  | Female                                                                    |                                               |                                                                                                                                                                                                                                                                                                                                                                                                                                                                                                                                                                                                                                                                                                                                                                                                                                                                                                                                                                                                                                                                                                                                                                           |   |         |   |               |   |          |   |                        |   |               |   |             |   |         |   |         |   |        |    |          |    |       |    |         |    |         |    |        |    |         |    |        |    |           |    |       |    |        |    |          |    |          |    |                |    |         |    |        |    |          |    |         |    |         |    |                        |    |               |
| 2  | Male                                                                      |                                               |                                                                                                                                                                                                                                                                                                                                                                                                                                                                                                                                                                                                                                                                                                                                                                                                                                                                                                                                                                                                                                                                                                                                                                           |   |         |   |               |   |          |   |                        |   |               |   |             |   |         |   |         |   |        |    |          |    |       |    |         |    |         |    |        |    |         |    |        |    |           |    |       |    |        |    |          |    |          |    |                |    |         |    |        |    |          |    |         |    |         |    |                        |    |               |
| 3  | Diverse                                                                   |                                               |                                                                                                                                                                                                                                                                                                                                                                                                                                                                                                                                                                                                                                                                                                                                                                                                                                                                                                                                                                                                                                                                                                                                                                           |   |         |   |               |   |          |   |                        |   |               |   |             |   |         |   |         |   |        |    |          |    |       |    |         |    |         |    |        |    |         |    |        |    |           |    |       |    |        |    |          |    |          |    |                |    |         |    |        |    |          |    |         |    |         |    |                        |    |               |
| 4  | Undefined                                                                 |                                               |                                                                                                                                                                                                                                                                                                                                                                                                                                                                                                                                                                                                                                                                                                                                                                                                                                                                                                                                                                                                                                                                                                                                                                           |   |         |   |               |   |          |   |                        |   |               |   |             |   |         |   |         |   |        |    |          |    |       |    |         |    |         |    |        |    |         |    |        |    |           |    |       |    |        |    |          |    |          |    |                |    |         |    |        |    |          |    |         |    |         |    |                        |    |               |
| 5  | Not specified                                                             |                                               |                                                                                                                                                                                                                                                                                                                                                                                                                                                                                                                                                                                                                                                                                                                                                                                                                                                                                                                                                                                                                                                                                                                                                                           |   |         |   |               |   |          |   |                        |   |               |   |             |   |         |   |         |   |        |    |          |    |       |    |         |    |         |    |        |    |         |    |        |    |           |    |       |    |        |    |          |    |          |    |                |    |         |    |        |    |          |    |         |    |         |    |                        |    |               |
| 49 | alter_1                                                                   | What is your age?<br><i>years</i>             | text (number, Min: 15, Max: 100)                                                                                                                                                                                                                                                                                                                                                                                                                                                                                                                                                                                                                                                                                                                                                                                                                                                                                                                                                                                                                                                                                                                                          |   |         |   |               |   |          |   |                        |   |               |   |             |   |         |   |         |   |        |    |          |    |       |    |         |    |         |    |        |    |         |    |        |    |           |    |       |    |        |    |          |    |          |    |                |    |         |    |        |    |          |    |         |    |         |    |                        |    |               |
| 50 | sektor_1                                                                  | In which area do you work in?                 | radio <table border="1"> <tr><td>1</td><td>Science</td></tr> <tr><td>2</td><td>Clinical Work</td></tr> <tr><td>3</td><td>Industry</td></tr> <tr><td>4</td><td>Other (please specify)</td></tr> <tr><td>5</td><td>Not specified</td></tr> </table><br>Custom alignment: LV                                                                                                                                                                                                                                                                                                                                                                                                                                                                                                                                                                                                                                                                                                                                                                                                                                                                                                 | 1 | Science | 2 | Clinical Work | 3 | Industry | 4 | Other (please specify) | 5 | Not specified |   |             |   |         |   |         |   |        |    |          |    |       |    |         |    |         |    |        |    |         |    |        |    |           |    |       |    |        |    |          |    |          |    |                |    |         |    |        |    |          |    |         |    |         |    |                        |    |               |
| 1  | Science                                                                   |                                               |                                                                                                                                                                                                                                                                                                                                                                                                                                                                                                                                                                                                                                                                                                                                                                                                                                                                                                                                                                                                                                                                                                                                                                           |   |         |   |               |   |          |   |                        |   |               |   |             |   |         |   |         |   |        |    |          |    |       |    |         |    |         |    |        |    |         |    |        |    |           |    |       |    |        |    |          |    |          |    |                |    |         |    |        |    |          |    |         |    |         |    |                        |    |               |
| 2  | Clinical Work                                                             |                                               |                                                                                                                                                                                                                                                                                                                                                                                                                                                                                                                                                                                                                                                                                                                                                                                                                                                                                                                                                                                                                                                                                                                                                                           |   |         |   |               |   |          |   |                        |   |               |   |             |   |         |   |         |   |        |    |          |    |       |    |         |    |         |    |        |    |         |    |        |    |           |    |       |    |        |    |          |    |          |    |                |    |         |    |        |    |          |    |         |    |         |    |                        |    |               |
| 3  | Industry                                                                  |                                               |                                                                                                                                                                                                                                                                                                                                                                                                                                                                                                                                                                                                                                                                                                                                                                                                                                                                                                                                                                                                                                                                                                                                                                           |   |         |   |               |   |          |   |                        |   |               |   |             |   |         |   |         |   |        |    |          |    |       |    |         |    |         |    |        |    |         |    |        |    |           |    |       |    |        |    |          |    |          |    |                |    |         |    |        |    |          |    |         |    |         |    |                        |    |               |
| 4  | Other (please specify)                                                    |                                               |                                                                                                                                                                                                                                                                                                                                                                                                                                                                                                                                                                                                                                                                                                                                                                                                                                                                                                                                                                                                                                                                                                                                                                           |   |         |   |               |   |          |   |                        |   |               |   |             |   |         |   |         |   |        |    |          |    |       |    |         |    |         |    |        |    |         |    |        |    |           |    |       |    |        |    |          |    |          |    |                |    |         |    |        |    |          |    |         |    |         |    |                        |    |               |
| 5  | Not specified                                                             |                                               |                                                                                                                                                                                                                                                                                                                                                                                                                                                                                                                                                                                                                                                                                                                                                                                                                                                                                                                                                                                                                                                                                                                                                                           |   |         |   |               |   |          |   |                        |   |               |   |             |   |         |   |         |   |        |    |          |    |       |    |         |    |         |    |        |    |         |    |        |    |           |    |       |    |        |    |          |    |          |    |                |    |         |    |        |    |          |    |         |    |         |    |                        |    |               |
| 51 | sektor_andere_1<br>Show the field ONLY if:<br>[sektor_1] = "4"            | What is your work environment:                | text                                                                                                                                                                                                                                                                                                                                                                                                                                                                                                                                                                                                                                                                                                                                                                                                                                                                                                                                                                                                                                                                                                                                                                      |   |         |   |               |   |          |   |                        |   |               |   |             |   |         |   |         |   |        |    |          |    |       |    |         |    |         |    |        |    |         |    |        |    |           |    |       |    |        |    |          |    |          |    |                |    |         |    |        |    |          |    |         |    |         |    |                        |    |               |



|    |                                                                                                |                                                                       |                                                                                                                                                                                                                                                                                                                                     |   |            |   |                                                  |   |                             |   |           |   |               |
|----|------------------------------------------------------------------------------------------------|-----------------------------------------------------------------------|-------------------------------------------------------------------------------------------------------------------------------------------------------------------------------------------------------------------------------------------------------------------------------------------------------------------------------------|---|------------|---|--------------------------------------------------|---|-----------------------------|---|-----------|---|---------------|
| 52 | ki_entwicklung_1                                                                               | Are you currently involved in AI-developments?                        | <p>radio, Required</p> <table border="1"> <tr><td>1</td><td>Yes</td></tr> <tr><td>2</td><td>No, but I have worked on AI-projects in the past</td></tr> <tr><td>3</td><td>No, but I am planning on it</td></tr> <tr><td>4</td><td>No, never</td></tr> <tr><td>5</td><td>Not specified</td></tr> </table> <p>Custom alignment: LV</p> | 1 | Yes        | 2 | No, but I have worked on AI-projects in the past | 3 | No, but I am planning on it | 4 | No, never | 5 | Not specified |
| 1  | Yes                                                                                            |                                                                       |                                                                                                                                                                                                                                                                                                                                     |   |            |   |                                                  |   |                             |   |           |   |               |
| 2  | No, but I have worked on AI-projects in the past                                               |                                                                       |                                                                                                                                                                                                                                                                                                                                     |   |            |   |                                                  |   |                             |   |           |   |               |
| 3  | No, but I am planning on it                                                                    |                                                                       |                                                                                                                                                                                                                                                                                                                                     |   |            |   |                                                  |   |                             |   |           |   |               |
| 4  | No, never                                                                                      |                                                                       |                                                                                                                                                                                                                                                                                                                                     |   |            |   |                                                  |   |                             |   |           |   |               |
| 5  | Not specified                                                                                  |                                                                       |                                                                                                                                                                                                                                                                                                                                     |   |            |   |                                                  |   |                             |   |           |   |               |
| 53 | kommentar_2<br>Show the field ONLY if:<br>[ki_entwicklung_1] = '4' or [ki_entwicklung_1] = '5' | Do you have any comments you want to provide about the questionnaire? | text                                                                                                                                                                                                                                                                                                                                |   |            |   |                                                  |   |                             |   |           |   |               |
| 54 | questionnaire_fairness_and_ai_complete                                                         | Section Header: <i>Form Status</i><br>Complete?                       | <p>dropdown</p> <table border="1"> <tr><td>0</td><td>Incomplete</td></tr> <tr><td>1</td><td>Unverified</td></tr> <tr><td>2</td><td>Complete</td></tr> </table>                                                                                                                                                                      | 0 | Incomplete | 1 | Unverified                                       | 2 | Complete                    |   |           |   |               |
| 0  | Incomplete                                                                                     |                                                                       |                                                                                                                                                                                                                                                                                                                                     |   |            |   |                                                  |   |                             |   |           |   |               |
| 1  | Unverified                                                                                     |                                                                       |                                                                                                                                                                                                                                                                                                                                     |   |            |   |                                                  |   |                             |   |           |   |               |
| 2  | Complete                                                                                       |                                                                       |                                                                                                                                                                                                                                                                                                                                     |   |            |   |                                                  |   |                             |   |           |   |               |

Instrument: **Questionnaire Fairness And Ai 2** (questionnaire\_fairness\_and\_ai\_2)

 Enabled as survey

[^ Collapse](#)

|    |                                                                                              |                                                                |                                                                                                                                                                                                                                                                                                                                                                                                                                                                                                                                                                                                                                                                                                                                                                         |   |                           |                  |   |                           |                                         |   |                           |                 |   |                           |                                 |   |                           |                           |   |                           |                                    |   |                           |                        |   |                           |               |
|----|----------------------------------------------------------------------------------------------|----------------------------------------------------------------|-------------------------------------------------------------------------------------------------------------------------------------------------------------------------------------------------------------------------------------------------------------------------------------------------------------------------------------------------------------------------------------------------------------------------------------------------------------------------------------------------------------------------------------------------------------------------------------------------------------------------------------------------------------------------------------------------------------------------------------------------------------------------|---|---------------------------|------------------|---|---------------------------|-----------------------------------------|---|---------------------------|-----------------|---|---------------------------|---------------------------------|---|---------------------------|---------------------------|---|---------------------------|------------------------------------|---|---------------------------|------------------------|---|---------------------------|---------------|
| 55 | ki_entwicklungsphase_1                                                                       | At what stage are you or have you been developing AI-projects? | <p>checkbox</p> <table border="1"> <tr><td>1</td><td>ki_entwicklungsphase_1__1</td><td>Project planning</td></tr> <tr><td>2</td><td>ki_entwicklungsphase_1__2</td><td>Data acquisition/<br/>data preprocessing</td></tr> <tr><td>3</td><td>ki_entwicklungsphase_1__3</td><td>Data annotation</td></tr> <tr><td>4</td><td>ki_entwicklungsphase_1__4</td><td>Identification of AI algorithms</td></tr> <tr><td>5</td><td>ki_entwicklungsphase_1__5</td><td>Training and optimization</td></tr> <tr><td>6</td><td>ki_entwicklungsphase_1__6</td><td>Practical testing of AI algorithms</td></tr> <tr><td>7</td><td>ki_entwicklungsphase_1__7</td><td>Other (please specify)</td></tr> <tr><td>8</td><td>ki_entwicklungsphase_1__8</td><td>Not specified</td></tr> </table> | 1 | ki_entwicklungsphase_1__1 | Project planning | 2 | ki_entwicklungsphase_1__2 | Data acquisition/<br>data preprocessing | 3 | ki_entwicklungsphase_1__3 | Data annotation | 4 | ki_entwicklungsphase_1__4 | Identification of AI algorithms | 5 | ki_entwicklungsphase_1__5 | Training and optimization | 6 | ki_entwicklungsphase_1__6 | Practical testing of AI algorithms | 7 | ki_entwicklungsphase_1__7 | Other (please specify) | 8 | ki_entwicklungsphase_1__8 | Not specified |
| 1  | ki_entwicklungsphase_1__1                                                                    | Project planning                                               |                                                                                                                                                                                                                                                                                                                                                                                                                                                                                                                                                                                                                                                                                                                                                                         |   |                           |                  |   |                           |                                         |   |                           |                 |   |                           |                                 |   |                           |                           |   |                           |                                    |   |                           |                        |   |                           |               |
| 2  | ki_entwicklungsphase_1__2                                                                    | Data acquisition/<br>data preprocessing                        |                                                                                                                                                                                                                                                                                                                                                                                                                                                                                                                                                                                                                                                                                                                                                                         |   |                           |                  |   |                           |                                         |   |                           |                 |   |                           |                                 |   |                           |                           |   |                           |                                    |   |                           |                        |   |                           |               |
| 3  | ki_entwicklungsphase_1__3                                                                    | Data annotation                                                |                                                                                                                                                                                                                                                                                                                                                                                                                                                                                                                                                                                                                                                                                                                                                                         |   |                           |                  |   |                           |                                         |   |                           |                 |   |                           |                                 |   |                           |                           |   |                           |                                    |   |                           |                        |   |                           |               |
| 4  | ki_entwicklungsphase_1__4                                                                    | Identification of AI algorithms                                |                                                                                                                                                                                                                                                                                                                                                                                                                                                                                                                                                                                                                                                                                                                                                                         |   |                           |                  |   |                           |                                         |   |                           |                 |   |                           |                                 |   |                           |                           |   |                           |                                    |   |                           |                        |   |                           |               |
| 5  | ki_entwicklungsphase_1__5                                                                    | Training and optimization                                      |                                                                                                                                                                                                                                                                                                                                                                                                                                                                                                                                                                                                                                                                                                                                                                         |   |                           |                  |   |                           |                                         |   |                           |                 |   |                           |                                 |   |                           |                           |   |                           |                                    |   |                           |                        |   |                           |               |
| 6  | ki_entwicklungsphase_1__6                                                                    | Practical testing of AI algorithms                             |                                                                                                                                                                                                                                                                                                                                                                                                                                                                                                                                                                                                                                                                                                                                                                         |   |                           |                  |   |                           |                                         |   |                           |                 |   |                           |                                 |   |                           |                           |   |                           |                                    |   |                           |                        |   |                           |               |
| 7  | ki_entwicklungsphase_1__7                                                                    | Other (please specify)                                         |                                                                                                                                                                                                                                                                                                                                                                                                                                                                                                                                                                                                                                                                                                                                                                         |   |                           |                  |   |                           |                                         |   |                           |                 |   |                           |                                 |   |                           |                           |   |                           |                                    |   |                           |                        |   |                           |               |
| 8  | ki_entwicklungsphase_1__8                                                                    | Not specified                                                  |                                                                                                                                                                                                                                                                                                                                                                                                                                                                                                                                                                                                                                                                                                                                                                         |   |                           |                  |   |                           |                                         |   |                           |                 |   |                           |                                 |   |                           |                           |   |                           |                                    |   |                           |                        |   |                           |               |
| 56 | ki_entwicklungsphase_ander_1<br>Show the field ONLY if:<br>[ki_entwicklungsphase_1(7)] = '1' | At what other stage are/were you developing:                   | text                                                                                                                                                                                                                                                                                                                                                                                                                                                                                                                                                                                                                                                                                                                                                                    |   |                           |                  |   |                           |                                         |   |                           |                 |   |                           |                                 |   |                           |                           |   |                           |                                    |   |                           |                        |   |                           |               |

|    |                                                                                      |                                                                   |                                                                                                                                                                                                                                                                                                                                                                                                                                                                                                                                                                                                                                                                                                                                                                                                                                                                                                                                                                                                                                                                                                                                                                                                                                                                                                                                                                                                                                                                                                                                                                                                                                                                                                                                                                                                                                                                                                                                                                                                                                                                                                                                                                                                                                                                                                                                                                                                                                                                                                                                                                                                                                                                                                                                                                                                                                                                                                                                                                                                                             |   |                      |                                  |   |                      |                |   |                      |                  |   |                      |                       |   |                      |               |   |                      |              |   |                      |         |   |                      |                           |   |                      |                     |    |                       |             |    |                       |          |    |                       |                      |    |                       |                   |    |                       |            |    |                       |                                 |    |                       |                     |    |                       |                                           |    |                       |                                |    |                       |              |    |                       |           |    |                       |                  |    |                       |               |    |                       |           |    |                       |              |    |                       |                                      |    |                       |                                      |    |                       |            |    |                       |                           |    |                       |                |    |                       |           |    |                       |                   |    |                       |              |    |                       |                      |    |                       |         |    |                       |                                       |    |                       |                        |    |                       |               |
|----|--------------------------------------------------------------------------------------|-------------------------------------------------------------------|-----------------------------------------------------------------------------------------------------------------------------------------------------------------------------------------------------------------------------------------------------------------------------------------------------------------------------------------------------------------------------------------------------------------------------------------------------------------------------------------------------------------------------------------------------------------------------------------------------------------------------------------------------------------------------------------------------------------------------------------------------------------------------------------------------------------------------------------------------------------------------------------------------------------------------------------------------------------------------------------------------------------------------------------------------------------------------------------------------------------------------------------------------------------------------------------------------------------------------------------------------------------------------------------------------------------------------------------------------------------------------------------------------------------------------------------------------------------------------------------------------------------------------------------------------------------------------------------------------------------------------------------------------------------------------------------------------------------------------------------------------------------------------------------------------------------------------------------------------------------------------------------------------------------------------------------------------------------------------------------------------------------------------------------------------------------------------------------------------------------------------------------------------------------------------------------------------------------------------------------------------------------------------------------------------------------------------------------------------------------------------------------------------------------------------------------------------------------------------------------------------------------------------------------------------------------------------------------------------------------------------------------------------------------------------------------------------------------------------------------------------------------------------------------------------------------------------------------------------------------------------------------------------------------------------------------------------------------------------------------------------------------------------|---|----------------------|----------------------------------|---|----------------------|----------------|---|----------------------|------------------|---|----------------------|-----------------------|---|----------------------|---------------|---|----------------------|--------------|---|----------------------|---------|---|----------------------|---------------------------|---|----------------------|---------------------|----|-----------------------|-------------|----|-----------------------|----------|----|-----------------------|----------------------|----|-----------------------|-------------------|----|-----------------------|------------|----|-----------------------|---------------------------------|----|-----------------------|---------------------|----|-----------------------|-------------------------------------------|----|-----------------------|--------------------------------|----|-----------------------|--------------|----|-----------------------|-----------|----|-----------------------|------------------|----|-----------------------|---------------|----|-----------------------|-----------|----|-----------------------|--------------|----|-----------------------|--------------------------------------|----|-----------------------|--------------------------------------|----|-----------------------|------------|----|-----------------------|---------------------------|----|-----------------------|----------------|----|-----------------------|-----------|----|-----------------------|-------------------|----|-----------------------|--------------|----|-----------------------|----------------------|----|-----------------------|---------|----|-----------------------|---------------------------------------|----|-----------------------|------------------------|----|-----------------------|---------------|
| 57 | med_fachbereich_1                                                                    | In which medical specialty are you developing AI solutions?       | checkbox<br><table border="1"> <tr><td>1</td><td>med_fachbereich_1__1</td><td>General Medicine/Family Medicine</td></tr> <tr><td>2</td><td>med_fachbereich_1__2</td><td>Anesthesiology</td></tr> <tr><td>3</td><td>med_fachbereich_1__3</td><td>Anatomy</td></tr> <tr><td>4</td><td>med_fachbereich_1__4</td><td>Occupational medicine</td></tr> <tr><td>5</td><td>med_fachbereich_1__5</td><td>Ophthalmology</td></tr> <tr><td>6</td><td>med_fachbereich_1__6</td><td>Biochemistry</td></tr> <tr><td>7</td><td>med_fachbereich_1__7</td><td>Surgery</td></tr> <tr><td>8</td><td>med_fachbereich_1__8</td><td>Obstetrics and gynecology</td></tr> <tr><td>9</td><td>med_fachbereich_1__9</td><td>Otorhinolaryngology</td></tr> <tr><td>10</td><td>med_fachbereich_1__10</td><td>Dermatology</td></tr> <tr><td>11</td><td>med_fachbereich_1__11</td><td>Genetics</td></tr> <tr><td>12</td><td>med_fachbereich_1__12</td><td>Environmental health</td></tr> <tr><td>13</td><td>med_fachbereich_1__13</td><td>Internal medicine</td></tr> <tr><td>14</td><td>med_fachbereich_1__14</td><td>Pediatrics</td></tr> <tr><td>15</td><td>med_fachbereich_1__15</td><td>Child and adolescent psychiatry</td></tr> <tr><td>16</td><td>med_fachbereich_1__16</td><td>Laboratory medicine</td></tr> <tr><td>17</td><td>med_fachbereich_1__17</td><td>Clinical microbiology/ Infectious disease</td></tr> <tr><td>18</td><td>med_fachbereich_1__18</td><td>Oral and maxillofacial surgery</td></tr> <tr><td>19</td><td>med_fachbereich_1__19</td><td>Neurosurgery</td></tr> <tr><td>20</td><td>med_fachbereich_1__20</td><td>Neurology</td></tr> <tr><td>21</td><td>med_fachbereich_1__21</td><td>Nuclear medicine</td></tr> <tr><td>22</td><td>med_fachbereich_1__22</td><td>Public Health</td></tr> <tr><td>23</td><td>med_fachbereich_1__23</td><td>Pathology</td></tr> <tr><td>24</td><td>med_fachbereich_1__24</td><td>Pharmacology</td></tr> <tr><td>25</td><td>med_fachbereich_1__25</td><td>Phoniatrics and paediatric audiology</td></tr> <tr><td>26</td><td>med_fachbereich_1__26</td><td>Physical medicine and rehabilitation</td></tr> <tr><td>27</td><td>med_fachbereich_1__27</td><td>Physiology</td></tr> <tr><td>28</td><td>med_fachbereich_1__28</td><td>Psychiatry/ Psychotherapy</td></tr> <tr><td>29</td><td>med_fachbereich_1__29</td><td>Psychosomatics</td></tr> <tr><td>30</td><td>med_fachbereich_1__30</td><td>Radiology</td></tr> <tr><td>31</td><td>med_fachbereich_1__31</td><td>Forensic medicine</td></tr> <tr><td>32</td><td>med_fachbereich_1__32</td><td>Radiotherapy</td></tr> <tr><td>33</td><td>med_fachbereich_1__33</td><td>Transfusion medicine</td></tr> <tr><td>34</td><td>med_fachbereich_1__34</td><td>Urology</td></tr> <tr><td>35</td><td>med_fachbereich_1__35</td><td>Medical Informatics/ Digital Medicine</td></tr> <tr><td>36</td><td>med_fachbereich_1__36</td><td>Other (please specify)</td></tr> <tr><td>37</td><td>med_fachbereich_1__37</td><td>Not specified</td></tr> </table> | 1 | med_fachbereich_1__1 | General Medicine/Family Medicine | 2 | med_fachbereich_1__2 | Anesthesiology | 3 | med_fachbereich_1__3 | Anatomy          | 4 | med_fachbereich_1__4 | Occupational medicine | 5 | med_fachbereich_1__5 | Ophthalmology | 6 | med_fachbereich_1__6 | Biochemistry | 7 | med_fachbereich_1__7 | Surgery | 8 | med_fachbereich_1__8 | Obstetrics and gynecology | 9 | med_fachbereich_1__9 | Otorhinolaryngology | 10 | med_fachbereich_1__10 | Dermatology | 11 | med_fachbereich_1__11 | Genetics | 12 | med_fachbereich_1__12 | Environmental health | 13 | med_fachbereich_1__13 | Internal medicine | 14 | med_fachbereich_1__14 | Pediatrics | 15 | med_fachbereich_1__15 | Child and adolescent psychiatry | 16 | med_fachbereich_1__16 | Laboratory medicine | 17 | med_fachbereich_1__17 | Clinical microbiology/ Infectious disease | 18 | med_fachbereich_1__18 | Oral and maxillofacial surgery | 19 | med_fachbereich_1__19 | Neurosurgery | 20 | med_fachbereich_1__20 | Neurology | 21 | med_fachbereich_1__21 | Nuclear medicine | 22 | med_fachbereich_1__22 | Public Health | 23 | med_fachbereich_1__23 | Pathology | 24 | med_fachbereich_1__24 | Pharmacology | 25 | med_fachbereich_1__25 | Phoniatrics and paediatric audiology | 26 | med_fachbereich_1__26 | Physical medicine and rehabilitation | 27 | med_fachbereich_1__27 | Physiology | 28 | med_fachbereich_1__28 | Psychiatry/ Psychotherapy | 29 | med_fachbereich_1__29 | Psychosomatics | 30 | med_fachbereich_1__30 | Radiology | 31 | med_fachbereich_1__31 | Forensic medicine | 32 | med_fachbereich_1__32 | Radiotherapy | 33 | med_fachbereich_1__33 | Transfusion medicine | 34 | med_fachbereich_1__34 | Urology | 35 | med_fachbereich_1__35 | Medical Informatics/ Digital Medicine | 36 | med_fachbereich_1__36 | Other (please specify) | 37 | med_fachbereich_1__37 | Not specified |
| 1  | med_fachbereich_1__1                                                                 | General Medicine/Family Medicine                                  |                                                                                                                                                                                                                                                                                                                                                                                                                                                                                                                                                                                                                                                                                                                                                                                                                                                                                                                                                                                                                                                                                                                                                                                                                                                                                                                                                                                                                                                                                                                                                                                                                                                                                                                                                                                                                                                                                                                                                                                                                                                                                                                                                                                                                                                                                                                                                                                                                                                                                                                                                                                                                                                                                                                                                                                                                                                                                                                                                                                                                             |   |                      |                                  |   |                      |                |   |                      |                  |   |                      |                       |   |                      |               |   |                      |              |   |                      |         |   |                      |                           |   |                      |                     |    |                       |             |    |                       |          |    |                       |                      |    |                       |                   |    |                       |            |    |                       |                                 |    |                       |                     |    |                       |                                           |    |                       |                                |    |                       |              |    |                       |           |    |                       |                  |    |                       |               |    |                       |           |    |                       |              |    |                       |                                      |    |                       |                                      |    |                       |            |    |                       |                           |    |                       |                |    |                       |           |    |                       |                   |    |                       |              |    |                       |                      |    |                       |         |    |                       |                                       |    |                       |                        |    |                       |               |
| 2  | med_fachbereich_1__2                                                                 | Anesthesiology                                                    |                                                                                                                                                                                                                                                                                                                                                                                                                                                                                                                                                                                                                                                                                                                                                                                                                                                                                                                                                                                                                                                                                                                                                                                                                                                                                                                                                                                                                                                                                                                                                                                                                                                                                                                                                                                                                                                                                                                                                                                                                                                                                                                                                                                                                                                                                                                                                                                                                                                                                                                                                                                                                                                                                                                                                                                                                                                                                                                                                                                                                             |   |                      |                                  |   |                      |                |   |                      |                  |   |                      |                       |   |                      |               |   |                      |              |   |                      |         |   |                      |                           |   |                      |                     |    |                       |             |    |                       |          |    |                       |                      |    |                       |                   |    |                       |            |    |                       |                                 |    |                       |                     |    |                       |                                           |    |                       |                                |    |                       |              |    |                       |           |    |                       |                  |    |                       |               |    |                       |           |    |                       |              |    |                       |                                      |    |                       |                                      |    |                       |            |    |                       |                           |    |                       |                |    |                       |           |    |                       |                   |    |                       |              |    |                       |                      |    |                       |         |    |                       |                                       |    |                       |                        |    |                       |               |
| 3  | med_fachbereich_1__3                                                                 | Anatomy                                                           |                                                                                                                                                                                                                                                                                                                                                                                                                                                                                                                                                                                                                                                                                                                                                                                                                                                                                                                                                                                                                                                                                                                                                                                                                                                                                                                                                                                                                                                                                                                                                                                                                                                                                                                                                                                                                                                                                                                                                                                                                                                                                                                                                                                                                                                                                                                                                                                                                                                                                                                                                                                                                                                                                                                                                                                                                                                                                                                                                                                                                             |   |                      |                                  |   |                      |                |   |                      |                  |   |                      |                       |   |                      |               |   |                      |              |   |                      |         |   |                      |                           |   |                      |                     |    |                       |             |    |                       |          |    |                       |                      |    |                       |                   |    |                       |            |    |                       |                                 |    |                       |                     |    |                       |                                           |    |                       |                                |    |                       |              |    |                       |           |    |                       |                  |    |                       |               |    |                       |           |    |                       |              |    |                       |                                      |    |                       |                                      |    |                       |            |    |                       |                           |    |                       |                |    |                       |           |    |                       |                   |    |                       |              |    |                       |                      |    |                       |         |    |                       |                                       |    |                       |                        |    |                       |               |
| 4  | med_fachbereich_1__4                                                                 | Occupational medicine                                             |                                                                                                                                                                                                                                                                                                                                                                                                                                                                                                                                                                                                                                                                                                                                                                                                                                                                                                                                                                                                                                                                                                                                                                                                                                                                                                                                                                                                                                                                                                                                                                                                                                                                                                                                                                                                                                                                                                                                                                                                                                                                                                                                                                                                                                                                                                                                                                                                                                                                                                                                                                                                                                                                                                                                                                                                                                                                                                                                                                                                                             |   |                      |                                  |   |                      |                |   |                      |                  |   |                      |                       |   |                      |               |   |                      |              |   |                      |         |   |                      |                           |   |                      |                     |    |                       |             |    |                       |          |    |                       |                      |    |                       |                   |    |                       |            |    |                       |                                 |    |                       |                     |    |                       |                                           |    |                       |                                |    |                       |              |    |                       |           |    |                       |                  |    |                       |               |    |                       |           |    |                       |              |    |                       |                                      |    |                       |                                      |    |                       |            |    |                       |                           |    |                       |                |    |                       |           |    |                       |                   |    |                       |              |    |                       |                      |    |                       |         |    |                       |                                       |    |                       |                        |    |                       |               |
| 5  | med_fachbereich_1__5                                                                 | Ophthalmology                                                     |                                                                                                                                                                                                                                                                                                                                                                                                                                                                                                                                                                                                                                                                                                                                                                                                                                                                                                                                                                                                                                                                                                                                                                                                                                                                                                                                                                                                                                                                                                                                                                                                                                                                                                                                                                                                                                                                                                                                                                                                                                                                                                                                                                                                                                                                                                                                                                                                                                                                                                                                                                                                                                                                                                                                                                                                                                                                                                                                                                                                                             |   |                      |                                  |   |                      |                |   |                      |                  |   |                      |                       |   |                      |               |   |                      |              |   |                      |         |   |                      |                           |   |                      |                     |    |                       |             |    |                       |          |    |                       |                      |    |                       |                   |    |                       |            |    |                       |                                 |    |                       |                     |    |                       |                                           |    |                       |                                |    |                       |              |    |                       |           |    |                       |                  |    |                       |               |    |                       |           |    |                       |              |    |                       |                                      |    |                       |                                      |    |                       |            |    |                       |                           |    |                       |                |    |                       |           |    |                       |                   |    |                       |              |    |                       |                      |    |                       |         |    |                       |                                       |    |                       |                        |    |                       |               |
| 6  | med_fachbereich_1__6                                                                 | Biochemistry                                                      |                                                                                                                                                                                                                                                                                                                                                                                                                                                                                                                                                                                                                                                                                                                                                                                                                                                                                                                                                                                                                                                                                                                                                                                                                                                                                                                                                                                                                                                                                                                                                                                                                                                                                                                                                                                                                                                                                                                                                                                                                                                                                                                                                                                                                                                                                                                                                                                                                                                                                                                                                                                                                                                                                                                                                                                                                                                                                                                                                                                                                             |   |                      |                                  |   |                      |                |   |                      |                  |   |                      |                       |   |                      |               |   |                      |              |   |                      |         |   |                      |                           |   |                      |                     |    |                       |             |    |                       |          |    |                       |                      |    |                       |                   |    |                       |            |    |                       |                                 |    |                       |                     |    |                       |                                           |    |                       |                                |    |                       |              |    |                       |           |    |                       |                  |    |                       |               |    |                       |           |    |                       |              |    |                       |                                      |    |                       |                                      |    |                       |            |    |                       |                           |    |                       |                |    |                       |           |    |                       |                   |    |                       |              |    |                       |                      |    |                       |         |    |                       |                                       |    |                       |                        |    |                       |               |
| 7  | med_fachbereich_1__7                                                                 | Surgery                                                           |                                                                                                                                                                                                                                                                                                                                                                                                                                                                                                                                                                                                                                                                                                                                                                                                                                                                                                                                                                                                                                                                                                                                                                                                                                                                                                                                                                                                                                                                                                                                                                                                                                                                                                                                                                                                                                                                                                                                                                                                                                                                                                                                                                                                                                                                                                                                                                                                                                                                                                                                                                                                                                                                                                                                                                                                                                                                                                                                                                                                                             |   |                      |                                  |   |                      |                |   |                      |                  |   |                      |                       |   |                      |               |   |                      |              |   |                      |         |   |                      |                           |   |                      |                     |    |                       |             |    |                       |          |    |                       |                      |    |                       |                   |    |                       |            |    |                       |                                 |    |                       |                     |    |                       |                                           |    |                       |                                |    |                       |              |    |                       |           |    |                       |                  |    |                       |               |    |                       |           |    |                       |              |    |                       |                                      |    |                       |                                      |    |                       |            |    |                       |                           |    |                       |                |    |                       |           |    |                       |                   |    |                       |              |    |                       |                      |    |                       |         |    |                       |                                       |    |                       |                        |    |                       |               |
| 8  | med_fachbereich_1__8                                                                 | Obstetrics and gynecology                                         |                                                                                                                                                                                                                                                                                                                                                                                                                                                                                                                                                                                                                                                                                                                                                                                                                                                                                                                                                                                                                                                                                                                                                                                                                                                                                                                                                                                                                                                                                                                                                                                                                                                                                                                                                                                                                                                                                                                                                                                                                                                                                                                                                                                                                                                                                                                                                                                                                                                                                                                                                                                                                                                                                                                                                                                                                                                                                                                                                                                                                             |   |                      |                                  |   |                      |                |   |                      |                  |   |                      |                       |   |                      |               |   |                      |              |   |                      |         |   |                      |                           |   |                      |                     |    |                       |             |    |                       |          |    |                       |                      |    |                       |                   |    |                       |            |    |                       |                                 |    |                       |                     |    |                       |                                           |    |                       |                                |    |                       |              |    |                       |           |    |                       |                  |    |                       |               |    |                       |           |    |                       |              |    |                       |                                      |    |                       |                                      |    |                       |            |    |                       |                           |    |                       |                |    |                       |           |    |                       |                   |    |                       |              |    |                       |                      |    |                       |         |    |                       |                                       |    |                       |                        |    |                       |               |
| 9  | med_fachbereich_1__9                                                                 | Otorhinolaryngology                                               |                                                                                                                                                                                                                                                                                                                                                                                                                                                                                                                                                                                                                                                                                                                                                                                                                                                                                                                                                                                                                                                                                                                                                                                                                                                                                                                                                                                                                                                                                                                                                                                                                                                                                                                                                                                                                                                                                                                                                                                                                                                                                                                                                                                                                                                                                                                                                                                                                                                                                                                                                                                                                                                                                                                                                                                                                                                                                                                                                                                                                             |   |                      |                                  |   |                      |                |   |                      |                  |   |                      |                       |   |                      |               |   |                      |              |   |                      |         |   |                      |                           |   |                      |                     |    |                       |             |    |                       |          |    |                       |                      |    |                       |                   |    |                       |            |    |                       |                                 |    |                       |                     |    |                       |                                           |    |                       |                                |    |                       |              |    |                       |           |    |                       |                  |    |                       |               |    |                       |           |    |                       |              |    |                       |                                      |    |                       |                                      |    |                       |            |    |                       |                           |    |                       |                |    |                       |           |    |                       |                   |    |                       |              |    |                       |                      |    |                       |         |    |                       |                                       |    |                       |                        |    |                       |               |
| 10 | med_fachbereich_1__10                                                                | Dermatology                                                       |                                                                                                                                                                                                                                                                                                                                                                                                                                                                                                                                                                                                                                                                                                                                                                                                                                                                                                                                                                                                                                                                                                                                                                                                                                                                                                                                                                                                                                                                                                                                                                                                                                                                                                                                                                                                                                                                                                                                                                                                                                                                                                                                                                                                                                                                                                                                                                                                                                                                                                                                                                                                                                                                                                                                                                                                                                                                                                                                                                                                                             |   |                      |                                  |   |                      |                |   |                      |                  |   |                      |                       |   |                      |               |   |                      |              |   |                      |         |   |                      |                           |   |                      |                     |    |                       |             |    |                       |          |    |                       |                      |    |                       |                   |    |                       |            |    |                       |                                 |    |                       |                     |    |                       |                                           |    |                       |                                |    |                       |              |    |                       |           |    |                       |                  |    |                       |               |    |                       |           |    |                       |              |    |                       |                                      |    |                       |                                      |    |                       |            |    |                       |                           |    |                       |                |    |                       |           |    |                       |                   |    |                       |              |    |                       |                      |    |                       |         |    |                       |                                       |    |                       |                        |    |                       |               |
| 11 | med_fachbereich_1__11                                                                | Genetics                                                          |                                                                                                                                                                                                                                                                                                                                                                                                                                                                                                                                                                                                                                                                                                                                                                                                                                                                                                                                                                                                                                                                                                                                                                                                                                                                                                                                                                                                                                                                                                                                                                                                                                                                                                                                                                                                                                                                                                                                                                                                                                                                                                                                                                                                                                                                                                                                                                                                                                                                                                                                                                                                                                                                                                                                                                                                                                                                                                                                                                                                                             |   |                      |                                  |   |                      |                |   |                      |                  |   |                      |                       |   |                      |               |   |                      |              |   |                      |         |   |                      |                           |   |                      |                     |    |                       |             |    |                       |          |    |                       |                      |    |                       |                   |    |                       |            |    |                       |                                 |    |                       |                     |    |                       |                                           |    |                       |                                |    |                       |              |    |                       |           |    |                       |                  |    |                       |               |    |                       |           |    |                       |              |    |                       |                                      |    |                       |                                      |    |                       |            |    |                       |                           |    |                       |                |    |                       |           |    |                       |                   |    |                       |              |    |                       |                      |    |                       |         |    |                       |                                       |    |                       |                        |    |                       |               |
| 12 | med_fachbereich_1__12                                                                | Environmental health                                              |                                                                                                                                                                                                                                                                                                                                                                                                                                                                                                                                                                                                                                                                                                                                                                                                                                                                                                                                                                                                                                                                                                                                                                                                                                                                                                                                                                                                                                                                                                                                                                                                                                                                                                                                                                                                                                                                                                                                                                                                                                                                                                                                                                                                                                                                                                                                                                                                                                                                                                                                                                                                                                                                                                                                                                                                                                                                                                                                                                                                                             |   |                      |                                  |   |                      |                |   |                      |                  |   |                      |                       |   |                      |               |   |                      |              |   |                      |         |   |                      |                           |   |                      |                     |    |                       |             |    |                       |          |    |                       |                      |    |                       |                   |    |                       |            |    |                       |                                 |    |                       |                     |    |                       |                                           |    |                       |                                |    |                       |              |    |                       |           |    |                       |                  |    |                       |               |    |                       |           |    |                       |              |    |                       |                                      |    |                       |                                      |    |                       |            |    |                       |                           |    |                       |                |    |                       |           |    |                       |                   |    |                       |              |    |                       |                      |    |                       |         |    |                       |                                       |    |                       |                        |    |                       |               |
| 13 | med_fachbereich_1__13                                                                | Internal medicine                                                 |                                                                                                                                                                                                                                                                                                                                                                                                                                                                                                                                                                                                                                                                                                                                                                                                                                                                                                                                                                                                                                                                                                                                                                                                                                                                                                                                                                                                                                                                                                                                                                                                                                                                                                                                                                                                                                                                                                                                                                                                                                                                                                                                                                                                                                                                                                                                                                                                                                                                                                                                                                                                                                                                                                                                                                                                                                                                                                                                                                                                                             |   |                      |                                  |   |                      |                |   |                      |                  |   |                      |                       |   |                      |               |   |                      |              |   |                      |         |   |                      |                           |   |                      |                     |    |                       |             |    |                       |          |    |                       |                      |    |                       |                   |    |                       |            |    |                       |                                 |    |                       |                     |    |                       |                                           |    |                       |                                |    |                       |              |    |                       |           |    |                       |                  |    |                       |               |    |                       |           |    |                       |              |    |                       |                                      |    |                       |                                      |    |                       |            |    |                       |                           |    |                       |                |    |                       |           |    |                       |                   |    |                       |              |    |                       |                      |    |                       |         |    |                       |                                       |    |                       |                        |    |                       |               |
| 14 | med_fachbereich_1__14                                                                | Pediatrics                                                        |                                                                                                                                                                                                                                                                                                                                                                                                                                                                                                                                                                                                                                                                                                                                                                                                                                                                                                                                                                                                                                                                                                                                                                                                                                                                                                                                                                                                                                                                                                                                                                                                                                                                                                                                                                                                                                                                                                                                                                                                                                                                                                                                                                                                                                                                                                                                                                                                                                                                                                                                                                                                                                                                                                                                                                                                                                                                                                                                                                                                                             |   |                      |                                  |   |                      |                |   |                      |                  |   |                      |                       |   |                      |               |   |                      |              |   |                      |         |   |                      |                           |   |                      |                     |    |                       |             |    |                       |          |    |                       |                      |    |                       |                   |    |                       |            |    |                       |                                 |    |                       |                     |    |                       |                                           |    |                       |                                |    |                       |              |    |                       |           |    |                       |                  |    |                       |               |    |                       |           |    |                       |              |    |                       |                                      |    |                       |                                      |    |                       |            |    |                       |                           |    |                       |                |    |                       |           |    |                       |                   |    |                       |              |    |                       |                      |    |                       |         |    |                       |                                       |    |                       |                        |    |                       |               |
| 15 | med_fachbereich_1__15                                                                | Child and adolescent psychiatry                                   |                                                                                                                                                                                                                                                                                                                                                                                                                                                                                                                                                                                                                                                                                                                                                                                                                                                                                                                                                                                                                                                                                                                                                                                                                                                                                                                                                                                                                                                                                                                                                                                                                                                                                                                                                                                                                                                                                                                                                                                                                                                                                                                                                                                                                                                                                                                                                                                                                                                                                                                                                                                                                                                                                                                                                                                                                                                                                                                                                                                                                             |   |                      |                                  |   |                      |                |   |                      |                  |   |                      |                       |   |                      |               |   |                      |              |   |                      |         |   |                      |                           |   |                      |                     |    |                       |             |    |                       |          |    |                       |                      |    |                       |                   |    |                       |            |    |                       |                                 |    |                       |                     |    |                       |                                           |    |                       |                                |    |                       |              |    |                       |           |    |                       |                  |    |                       |               |    |                       |           |    |                       |              |    |                       |                                      |    |                       |                                      |    |                       |            |    |                       |                           |    |                       |                |    |                       |           |    |                       |                   |    |                       |              |    |                       |                      |    |                       |         |    |                       |                                       |    |                       |                        |    |                       |               |
| 16 | med_fachbereich_1__16                                                                | Laboratory medicine                                               |                                                                                                                                                                                                                                                                                                                                                                                                                                                                                                                                                                                                                                                                                                                                                                                                                                                                                                                                                                                                                                                                                                                                                                                                                                                                                                                                                                                                                                                                                                                                                                                                                                                                                                                                                                                                                                                                                                                                                                                                                                                                                                                                                                                                                                                                                                                                                                                                                                                                                                                                                                                                                                                                                                                                                                                                                                                                                                                                                                                                                             |   |                      |                                  |   |                      |                |   |                      |                  |   |                      |                       |   |                      |               |   |                      |              |   |                      |         |   |                      |                           |   |                      |                     |    |                       |             |    |                       |          |    |                       |                      |    |                       |                   |    |                       |            |    |                       |                                 |    |                       |                     |    |                       |                                           |    |                       |                                |    |                       |              |    |                       |           |    |                       |                  |    |                       |               |    |                       |           |    |                       |              |    |                       |                                      |    |                       |                                      |    |                       |            |    |                       |                           |    |                       |                |    |                       |           |    |                       |                   |    |                       |              |    |                       |                      |    |                       |         |    |                       |                                       |    |                       |                        |    |                       |               |
| 17 | med_fachbereich_1__17                                                                | Clinical microbiology/ Infectious disease                         |                                                                                                                                                                                                                                                                                                                                                                                                                                                                                                                                                                                                                                                                                                                                                                                                                                                                                                                                                                                                                                                                                                                                                                                                                                                                                                                                                                                                                                                                                                                                                                                                                                                                                                                                                                                                                                                                                                                                                                                                                                                                                                                                                                                                                                                                                                                                                                                                                                                                                                                                                                                                                                                                                                                                                                                                                                                                                                                                                                                                                             |   |                      |                                  |   |                      |                |   |                      |                  |   |                      |                       |   |                      |               |   |                      |              |   |                      |         |   |                      |                           |   |                      |                     |    |                       |             |    |                       |          |    |                       |                      |    |                       |                   |    |                       |            |    |                       |                                 |    |                       |                     |    |                       |                                           |    |                       |                                |    |                       |              |    |                       |           |    |                       |                  |    |                       |               |    |                       |           |    |                       |              |    |                       |                                      |    |                       |                                      |    |                       |            |    |                       |                           |    |                       |                |    |                       |           |    |                       |                   |    |                       |              |    |                       |                      |    |                       |         |    |                       |                                       |    |                       |                        |    |                       |               |
| 18 | med_fachbereich_1__18                                                                | Oral and maxillofacial surgery                                    |                                                                                                                                                                                                                                                                                                                                                                                                                                                                                                                                                                                                                                                                                                                                                                                                                                                                                                                                                                                                                                                                                                                                                                                                                                                                                                                                                                                                                                                                                                                                                                                                                                                                                                                                                                                                                                                                                                                                                                                                                                                                                                                                                                                                                                                                                                                                                                                                                                                                                                                                                                                                                                                                                                                                                                                                                                                                                                                                                                                                                             |   |                      |                                  |   |                      |                |   |                      |                  |   |                      |                       |   |                      |               |   |                      |              |   |                      |         |   |                      |                           |   |                      |                     |    |                       |             |    |                       |          |    |                       |                      |    |                       |                   |    |                       |            |    |                       |                                 |    |                       |                     |    |                       |                                           |    |                       |                                |    |                       |              |    |                       |           |    |                       |                  |    |                       |               |    |                       |           |    |                       |              |    |                       |                                      |    |                       |                                      |    |                       |            |    |                       |                           |    |                       |                |    |                       |           |    |                       |                   |    |                       |              |    |                       |                      |    |                       |         |    |                       |                                       |    |                       |                        |    |                       |               |
| 19 | med_fachbereich_1__19                                                                | Neurosurgery                                                      |                                                                                                                                                                                                                                                                                                                                                                                                                                                                                                                                                                                                                                                                                                                                                                                                                                                                                                                                                                                                                                                                                                                                                                                                                                                                                                                                                                                                                                                                                                                                                                                                                                                                                                                                                                                                                                                                                                                                                                                                                                                                                                                                                                                                                                                                                                                                                                                                                                                                                                                                                                                                                                                                                                                                                                                                                                                                                                                                                                                                                             |   |                      |                                  |   |                      |                |   |                      |                  |   |                      |                       |   |                      |               |   |                      |              |   |                      |         |   |                      |                           |   |                      |                     |    |                       |             |    |                       |          |    |                       |                      |    |                       |                   |    |                       |            |    |                       |                                 |    |                       |                     |    |                       |                                           |    |                       |                                |    |                       |              |    |                       |           |    |                       |                  |    |                       |               |    |                       |           |    |                       |              |    |                       |                                      |    |                       |                                      |    |                       |            |    |                       |                           |    |                       |                |    |                       |           |    |                       |                   |    |                       |              |    |                       |                      |    |                       |         |    |                       |                                       |    |                       |                        |    |                       |               |
| 20 | med_fachbereich_1__20                                                                | Neurology                                                         |                                                                                                                                                                                                                                                                                                                                                                                                                                                                                                                                                                                                                                                                                                                                                                                                                                                                                                                                                                                                                                                                                                                                                                                                                                                                                                                                                                                                                                                                                                                                                                                                                                                                                                                                                                                                                                                                                                                                                                                                                                                                                                                                                                                                                                                                                                                                                                                                                                                                                                                                                                                                                                                                                                                                                                                                                                                                                                                                                                                                                             |   |                      |                                  |   |                      |                |   |                      |                  |   |                      |                       |   |                      |               |   |                      |              |   |                      |         |   |                      |                           |   |                      |                     |    |                       |             |    |                       |          |    |                       |                      |    |                       |                   |    |                       |            |    |                       |                                 |    |                       |                     |    |                       |                                           |    |                       |                                |    |                       |              |    |                       |           |    |                       |                  |    |                       |               |    |                       |           |    |                       |              |    |                       |                                      |    |                       |                                      |    |                       |            |    |                       |                           |    |                       |                |    |                       |           |    |                       |                   |    |                       |              |    |                       |                      |    |                       |         |    |                       |                                       |    |                       |                        |    |                       |               |
| 21 | med_fachbereich_1__21                                                                | Nuclear medicine                                                  |                                                                                                                                                                                                                                                                                                                                                                                                                                                                                                                                                                                                                                                                                                                                                                                                                                                                                                                                                                                                                                                                                                                                                                                                                                                                                                                                                                                                                                                                                                                                                                                                                                                                                                                                                                                                                                                                                                                                                                                                                                                                                                                                                                                                                                                                                                                                                                                                                                                                                                                                                                                                                                                                                                                                                                                                                                                                                                                                                                                                                             |   |                      |                                  |   |                      |                |   |                      |                  |   |                      |                       |   |                      |               |   |                      |              |   |                      |         |   |                      |                           |   |                      |                     |    |                       |             |    |                       |          |    |                       |                      |    |                       |                   |    |                       |            |    |                       |                                 |    |                       |                     |    |                       |                                           |    |                       |                                |    |                       |              |    |                       |           |    |                       |                  |    |                       |               |    |                       |           |    |                       |              |    |                       |                                      |    |                       |                                      |    |                       |            |    |                       |                           |    |                       |                |    |                       |           |    |                       |                   |    |                       |              |    |                       |                      |    |                       |         |    |                       |                                       |    |                       |                        |    |                       |               |
| 22 | med_fachbereich_1__22                                                                | Public Health                                                     |                                                                                                                                                                                                                                                                                                                                                                                                                                                                                                                                                                                                                                                                                                                                                                                                                                                                                                                                                                                                                                                                                                                                                                                                                                                                                                                                                                                                                                                                                                                                                                                                                                                                                                                                                                                                                                                                                                                                                                                                                                                                                                                                                                                                                                                                                                                                                                                                                                                                                                                                                                                                                                                                                                                                                                                                                                                                                                                                                                                                                             |   |                      |                                  |   |                      |                |   |                      |                  |   |                      |                       |   |                      |               |   |                      |              |   |                      |         |   |                      |                           |   |                      |                     |    |                       |             |    |                       |          |    |                       |                      |    |                       |                   |    |                       |            |    |                       |                                 |    |                       |                     |    |                       |                                           |    |                       |                                |    |                       |              |    |                       |           |    |                       |                  |    |                       |               |    |                       |           |    |                       |              |    |                       |                                      |    |                       |                                      |    |                       |            |    |                       |                           |    |                       |                |    |                       |           |    |                       |                   |    |                       |              |    |                       |                      |    |                       |         |    |                       |                                       |    |                       |                        |    |                       |               |
| 23 | med_fachbereich_1__23                                                                | Pathology                                                         |                                                                                                                                                                                                                                                                                                                                                                                                                                                                                                                                                                                                                                                                                                                                                                                                                                                                                                                                                                                                                                                                                                                                                                                                                                                                                                                                                                                                                                                                                                                                                                                                                                                                                                                                                                                                                                                                                                                                                                                                                                                                                                                                                                                                                                                                                                                                                                                                                                                                                                                                                                                                                                                                                                                                                                                                                                                                                                                                                                                                                             |   |                      |                                  |   |                      |                |   |                      |                  |   |                      |                       |   |                      |               |   |                      |              |   |                      |         |   |                      |                           |   |                      |                     |    |                       |             |    |                       |          |    |                       |                      |    |                       |                   |    |                       |            |    |                       |                                 |    |                       |                     |    |                       |                                           |    |                       |                                |    |                       |              |    |                       |           |    |                       |                  |    |                       |               |    |                       |           |    |                       |              |    |                       |                                      |    |                       |                                      |    |                       |            |    |                       |                           |    |                       |                |    |                       |           |    |                       |                   |    |                       |              |    |                       |                      |    |                       |         |    |                       |                                       |    |                       |                        |    |                       |               |
| 24 | med_fachbereich_1__24                                                                | Pharmacology                                                      |                                                                                                                                                                                                                                                                                                                                                                                                                                                                                                                                                                                                                                                                                                                                                                                                                                                                                                                                                                                                                                                                                                                                                                                                                                                                                                                                                                                                                                                                                                                                                                                                                                                                                                                                                                                                                                                                                                                                                                                                                                                                                                                                                                                                                                                                                                                                                                                                                                                                                                                                                                                                                                                                                                                                                                                                                                                                                                                                                                                                                             |   |                      |                                  |   |                      |                |   |                      |                  |   |                      |                       |   |                      |               |   |                      |              |   |                      |         |   |                      |                           |   |                      |                     |    |                       |             |    |                       |          |    |                       |                      |    |                       |                   |    |                       |            |    |                       |                                 |    |                       |                     |    |                       |                                           |    |                       |                                |    |                       |              |    |                       |           |    |                       |                  |    |                       |               |    |                       |           |    |                       |              |    |                       |                                      |    |                       |                                      |    |                       |            |    |                       |                           |    |                       |                |    |                       |           |    |                       |                   |    |                       |              |    |                       |                      |    |                       |         |    |                       |                                       |    |                       |                        |    |                       |               |
| 25 | med_fachbereich_1__25                                                                | Phoniatrics and paediatric audiology                              |                                                                                                                                                                                                                                                                                                                                                                                                                                                                                                                                                                                                                                                                                                                                                                                                                                                                                                                                                                                                                                                                                                                                                                                                                                                                                                                                                                                                                                                                                                                                                                                                                                                                                                                                                                                                                                                                                                                                                                                                                                                                                                                                                                                                                                                                                                                                                                                                                                                                                                                                                                                                                                                                                                                                                                                                                                                                                                                                                                                                                             |   |                      |                                  |   |                      |                |   |                      |                  |   |                      |                       |   |                      |               |   |                      |              |   |                      |         |   |                      |                           |   |                      |                     |    |                       |             |    |                       |          |    |                       |                      |    |                       |                   |    |                       |            |    |                       |                                 |    |                       |                     |    |                       |                                           |    |                       |                                |    |                       |              |    |                       |           |    |                       |                  |    |                       |               |    |                       |           |    |                       |              |    |                       |                                      |    |                       |                                      |    |                       |            |    |                       |                           |    |                       |                |    |                       |           |    |                       |                   |    |                       |              |    |                       |                      |    |                       |         |    |                       |                                       |    |                       |                        |    |                       |               |
| 26 | med_fachbereich_1__26                                                                | Physical medicine and rehabilitation                              |                                                                                                                                                                                                                                                                                                                                                                                                                                                                                                                                                                                                                                                                                                                                                                                                                                                                                                                                                                                                                                                                                                                                                                                                                                                                                                                                                                                                                                                                                                                                                                                                                                                                                                                                                                                                                                                                                                                                                                                                                                                                                                                                                                                                                                                                                                                                                                                                                                                                                                                                                                                                                                                                                                                                                                                                                                                                                                                                                                                                                             |   |                      |                                  |   |                      |                |   |                      |                  |   |                      |                       |   |                      |               |   |                      |              |   |                      |         |   |                      |                           |   |                      |                     |    |                       |             |    |                       |          |    |                       |                      |    |                       |                   |    |                       |            |    |                       |                                 |    |                       |                     |    |                       |                                           |    |                       |                                |    |                       |              |    |                       |           |    |                       |                  |    |                       |               |    |                       |           |    |                       |              |    |                       |                                      |    |                       |                                      |    |                       |            |    |                       |                           |    |                       |                |    |                       |           |    |                       |                   |    |                       |              |    |                       |                      |    |                       |         |    |                       |                                       |    |                       |                        |    |                       |               |
| 27 | med_fachbereich_1__27                                                                | Physiology                                                        |                                                                                                                                                                                                                                                                                                                                                                                                                                                                                                                                                                                                                                                                                                                                                                                                                                                                                                                                                                                                                                                                                                                                                                                                                                                                                                                                                                                                                                                                                                                                                                                                                                                                                                                                                                                                                                                                                                                                                                                                                                                                                                                                                                                                                                                                                                                                                                                                                                                                                                                                                                                                                                                                                                                                                                                                                                                                                                                                                                                                                             |   |                      |                                  |   |                      |                |   |                      |                  |   |                      |                       |   |                      |               |   |                      |              |   |                      |         |   |                      |                           |   |                      |                     |    |                       |             |    |                       |          |    |                       |                      |    |                       |                   |    |                       |            |    |                       |                                 |    |                       |                     |    |                       |                                           |    |                       |                                |    |                       |              |    |                       |           |    |                       |                  |    |                       |               |    |                       |           |    |                       |              |    |                       |                                      |    |                       |                                      |    |                       |            |    |                       |                           |    |                       |                |    |                       |           |    |                       |                   |    |                       |              |    |                       |                      |    |                       |         |    |                       |                                       |    |                       |                        |    |                       |               |
| 28 | med_fachbereich_1__28                                                                | Psychiatry/ Psychotherapy                                         |                                                                                                                                                                                                                                                                                                                                                                                                                                                                                                                                                                                                                                                                                                                                                                                                                                                                                                                                                                                                                                                                                                                                                                                                                                                                                                                                                                                                                                                                                                                                                                                                                                                                                                                                                                                                                                                                                                                                                                                                                                                                                                                                                                                                                                                                                                                                                                                                                                                                                                                                                                                                                                                                                                                                                                                                                                                                                                                                                                                                                             |   |                      |                                  |   |                      |                |   |                      |                  |   |                      |                       |   |                      |               |   |                      |              |   |                      |         |   |                      |                           |   |                      |                     |    |                       |             |    |                       |          |    |                       |                      |    |                       |                   |    |                       |            |    |                       |                                 |    |                       |                     |    |                       |                                           |    |                       |                                |    |                       |              |    |                       |           |    |                       |                  |    |                       |               |    |                       |           |    |                       |              |    |                       |                                      |    |                       |                                      |    |                       |            |    |                       |                           |    |                       |                |    |                       |           |    |                       |                   |    |                       |              |    |                       |                      |    |                       |         |    |                       |                                       |    |                       |                        |    |                       |               |
| 29 | med_fachbereich_1__29                                                                | Psychosomatics                                                    |                                                                                                                                                                                                                                                                                                                                                                                                                                                                                                                                                                                                                                                                                                                                                                                                                                                                                                                                                                                                                                                                                                                                                                                                                                                                                                                                                                                                                                                                                                                                                                                                                                                                                                                                                                                                                                                                                                                                                                                                                                                                                                                                                                                                                                                                                                                                                                                                                                                                                                                                                                                                                                                                                                                                                                                                                                                                                                                                                                                                                             |   |                      |                                  |   |                      |                |   |                      |                  |   |                      |                       |   |                      |               |   |                      |              |   |                      |         |   |                      |                           |   |                      |                     |    |                       |             |    |                       |          |    |                       |                      |    |                       |                   |    |                       |            |    |                       |                                 |    |                       |                     |    |                       |                                           |    |                       |                                |    |                       |              |    |                       |           |    |                       |                  |    |                       |               |    |                       |           |    |                       |              |    |                       |                                      |    |                       |                                      |    |                       |            |    |                       |                           |    |                       |                |    |                       |           |    |                       |                   |    |                       |              |    |                       |                      |    |                       |         |    |                       |                                       |    |                       |                        |    |                       |               |
| 30 | med_fachbereich_1__30                                                                | Radiology                                                         |                                                                                                                                                                                                                                                                                                                                                                                                                                                                                                                                                                                                                                                                                                                                                                                                                                                                                                                                                                                                                                                                                                                                                                                                                                                                                                                                                                                                                                                                                                                                                                                                                                                                                                                                                                                                                                                                                                                                                                                                                                                                                                                                                                                                                                                                                                                                                                                                                                                                                                                                                                                                                                                                                                                                                                                                                                                                                                                                                                                                                             |   |                      |                                  |   |                      |                |   |                      |                  |   |                      |                       |   |                      |               |   |                      |              |   |                      |         |   |                      |                           |   |                      |                     |    |                       |             |    |                       |          |    |                       |                      |    |                       |                   |    |                       |            |    |                       |                                 |    |                       |                     |    |                       |                                           |    |                       |                                |    |                       |              |    |                       |           |    |                       |                  |    |                       |               |    |                       |           |    |                       |              |    |                       |                                      |    |                       |                                      |    |                       |            |    |                       |                           |    |                       |                |    |                       |           |    |                       |                   |    |                       |              |    |                       |                      |    |                       |         |    |                       |                                       |    |                       |                        |    |                       |               |
| 31 | med_fachbereich_1__31                                                                | Forensic medicine                                                 |                                                                                                                                                                                                                                                                                                                                                                                                                                                                                                                                                                                                                                                                                                                                                                                                                                                                                                                                                                                                                                                                                                                                                                                                                                                                                                                                                                                                                                                                                                                                                                                                                                                                                                                                                                                                                                                                                                                                                                                                                                                                                                                                                                                                                                                                                                                                                                                                                                                                                                                                                                                                                                                                                                                                                                                                                                                                                                                                                                                                                             |   |                      |                                  |   |                      |                |   |                      |                  |   |                      |                       |   |                      |               |   |                      |              |   |                      |         |   |                      |                           |   |                      |                     |    |                       |             |    |                       |          |    |                       |                      |    |                       |                   |    |                       |            |    |                       |                                 |    |                       |                     |    |                       |                                           |    |                       |                                |    |                       |              |    |                       |           |    |                       |                  |    |                       |               |    |                       |           |    |                       |              |    |                       |                                      |    |                       |                                      |    |                       |            |    |                       |                           |    |                       |                |    |                       |           |    |                       |                   |    |                       |              |    |                       |                      |    |                       |         |    |                       |                                       |    |                       |                        |    |                       |               |
| 32 | med_fachbereich_1__32                                                                | Radiotherapy                                                      |                                                                                                                                                                                                                                                                                                                                                                                                                                                                                                                                                                                                                                                                                                                                                                                                                                                                                                                                                                                                                                                                                                                                                                                                                                                                                                                                                                                                                                                                                                                                                                                                                                                                                                                                                                                                                                                                                                                                                                                                                                                                                                                                                                                                                                                                                                                                                                                                                                                                                                                                                                                                                                                                                                                                                                                                                                                                                                                                                                                                                             |   |                      |                                  |   |                      |                |   |                      |                  |   |                      |                       |   |                      |               |   |                      |              |   |                      |         |   |                      |                           |   |                      |                     |    |                       |             |    |                       |          |    |                       |                      |    |                       |                   |    |                       |            |    |                       |                                 |    |                       |                     |    |                       |                                           |    |                       |                                |    |                       |              |    |                       |           |    |                       |                  |    |                       |               |    |                       |           |    |                       |              |    |                       |                                      |    |                       |                                      |    |                       |            |    |                       |                           |    |                       |                |    |                       |           |    |                       |                   |    |                       |              |    |                       |                      |    |                       |         |    |                       |                                       |    |                       |                        |    |                       |               |
| 33 | med_fachbereich_1__33                                                                | Transfusion medicine                                              |                                                                                                                                                                                                                                                                                                                                                                                                                                                                                                                                                                                                                                                                                                                                                                                                                                                                                                                                                                                                                                                                                                                                                                                                                                                                                                                                                                                                                                                                                                                                                                                                                                                                                                                                                                                                                                                                                                                                                                                                                                                                                                                                                                                                                                                                                                                                                                                                                                                                                                                                                                                                                                                                                                                                                                                                                                                                                                                                                                                                                             |   |                      |                                  |   |                      |                |   |                      |                  |   |                      |                       |   |                      |               |   |                      |              |   |                      |         |   |                      |                           |   |                      |                     |    |                       |             |    |                       |          |    |                       |                      |    |                       |                   |    |                       |            |    |                       |                                 |    |                       |                     |    |                       |                                           |    |                       |                                |    |                       |              |    |                       |           |    |                       |                  |    |                       |               |    |                       |           |    |                       |              |    |                       |                                      |    |                       |                                      |    |                       |            |    |                       |                           |    |                       |                |    |                       |           |    |                       |                   |    |                       |              |    |                       |                      |    |                       |         |    |                       |                                       |    |                       |                        |    |                       |               |
| 34 | med_fachbereich_1__34                                                                | Urology                                                           |                                                                                                                                                                                                                                                                                                                                                                                                                                                                                                                                                                                                                                                                                                                                                                                                                                                                                                                                                                                                                                                                                                                                                                                                                                                                                                                                                                                                                                                                                                                                                                                                                                                                                                                                                                                                                                                                                                                                                                                                                                                                                                                                                                                                                                                                                                                                                                                                                                                                                                                                                                                                                                                                                                                                                                                                                                                                                                                                                                                                                             |   |                      |                                  |   |                      |                |   |                      |                  |   |                      |                       |   |                      |               |   |                      |              |   |                      |         |   |                      |                           |   |                      |                     |    |                       |             |    |                       |          |    |                       |                      |    |                       |                   |    |                       |            |    |                       |                                 |    |                       |                     |    |                       |                                           |    |                       |                                |    |                       |              |    |                       |           |    |                       |                  |    |                       |               |    |                       |           |    |                       |              |    |                       |                                      |    |                       |                                      |    |                       |            |    |                       |                           |    |                       |                |    |                       |           |    |                       |                   |    |                       |              |    |                       |                      |    |                       |         |    |                       |                                       |    |                       |                        |    |                       |               |
| 35 | med_fachbereich_1__35                                                                | Medical Informatics/ Digital Medicine                             |                                                                                                                                                                                                                                                                                                                                                                                                                                                                                                                                                                                                                                                                                                                                                                                                                                                                                                                                                                                                                                                                                                                                                                                                                                                                                                                                                                                                                                                                                                                                                                                                                                                                                                                                                                                                                                                                                                                                                                                                                                                                                                                                                                                                                                                                                                                                                                                                                                                                                                                                                                                                                                                                                                                                                                                                                                                                                                                                                                                                                             |   |                      |                                  |   |                      |                |   |                      |                  |   |                      |                       |   |                      |               |   |                      |              |   |                      |         |   |                      |                           |   |                      |                     |    |                       |             |    |                       |          |    |                       |                      |    |                       |                   |    |                       |            |    |                       |                                 |    |                       |                     |    |                       |                                           |    |                       |                                |    |                       |              |    |                       |           |    |                       |                  |    |                       |               |    |                       |           |    |                       |              |    |                       |                                      |    |                       |                                      |    |                       |            |    |                       |                           |    |                       |                |    |                       |           |    |                       |                   |    |                       |              |    |                       |                      |    |                       |         |    |                       |                                       |    |                       |                        |    |                       |               |
| 36 | med_fachbereich_1__36                                                                | Other (please specify)                                            |                                                                                                                                                                                                                                                                                                                                                                                                                                                                                                                                                                                                                                                                                                                                                                                                                                                                                                                                                                                                                                                                                                                                                                                                                                                                                                                                                                                                                                                                                                                                                                                                                                                                                                                                                                                                                                                                                                                                                                                                                                                                                                                                                                                                                                                                                                                                                                                                                                                                                                                                                                                                                                                                                                                                                                                                                                                                                                                                                                                                                             |   |                      |                                  |   |                      |                |   |                      |                  |   |                      |                       |   |                      |               |   |                      |              |   |                      |         |   |                      |                           |   |                      |                     |    |                       |             |    |                       |          |    |                       |                      |    |                       |                   |    |                       |            |    |                       |                                 |    |                       |                     |    |                       |                                           |    |                       |                                |    |                       |              |    |                       |           |    |                       |                  |    |                       |               |    |                       |           |    |                       |              |    |                       |                                      |    |                       |                                      |    |                       |            |    |                       |                           |    |                       |                |    |                       |           |    |                       |                   |    |                       |              |    |                       |                      |    |                       |         |    |                       |                                       |    |                       |                        |    |                       |               |
| 37 | med_fachbereich_1__37                                                                | Not specified                                                     |                                                                                                                                                                                                                                                                                                                                                                                                                                                                                                                                                                                                                                                                                                                                                                                                                                                                                                                                                                                                                                                                                                                                                                                                                                                                                                                                                                                                                                                                                                                                                                                                                                                                                                                                                                                                                                                                                                                                                                                                                                                                                                                                                                                                                                                                                                                                                                                                                                                                                                                                                                                                                                                                                                                                                                                                                                                                                                                                                                                                                             |   |                      |                                  |   |                      |                |   |                      |                  |   |                      |                       |   |                      |               |   |                      |              |   |                      |         |   |                      |                           |   |                      |                     |    |                       |             |    |                       |          |    |                       |                      |    |                       |                   |    |                       |            |    |                       |                                 |    |                       |                     |    |                       |                                           |    |                       |                                |    |                       |              |    |                       |           |    |                       |                  |    |                       |               |    |                       |           |    |                       |              |    |                       |                                      |    |                       |                                      |    |                       |            |    |                       |                           |    |                       |                |    |                       |           |    |                       |                   |    |                       |              |    |                       |                      |    |                       |         |    |                       |                                       |    |                       |                        |    |                       |               |
| 58 | med_fachbereich_andere_1<br>Show the field ONLY if:<br>[med_fachbereich_1(36)] = '1' | In which other medical specialty are you developing AI solutions? | text                                                                                                                                                                                                                                                                                                                                                                                                                                                                                                                                                                                                                                                                                                                                                                                                                                                                                                                                                                                                                                                                                                                                                                                                                                                                                                                                                                                                                                                                                                                                                                                                                                                                                                                                                                                                                                                                                                                                                                                                                                                                                                                                                                                                                                                                                                                                                                                                                                                                                                                                                                                                                                                                                                                                                                                                                                                                                                                                                                                                                        |   |                      |                                  |   |                      |                |   |                      |                  |   |                      |                       |   |                      |               |   |                      |              |   |                      |         |   |                      |                           |   |                      |                     |    |                       |             |    |                       |          |    |                       |                      |    |                       |                   |    |                       |            |    |                       |                                 |    |                       |                     |    |                       |                                           |    |                       |                                |    |                       |              |    |                       |           |    |                       |                  |    |                       |               |    |                       |           |    |                       |              |    |                       |                                      |    |                       |                                      |    |                       |            |    |                       |                           |    |                       |                |    |                       |           |    |                       |                   |    |                       |              |    |                       |                      |    |                       |         |    |                       |                                       |    |                       |                        |    |                       |               |
| 59 | ki_art_1                                                                             | In which of the following areas of AI are you developing?         | checkbox<br><table border="1"> <tr><td>1</td><td>ki_art_1__1</td><td>Machine Learning</td></tr> <tr><td>2</td><td>ki_art_1__2</td><td>Deep Learning</td></tr> <tr><td>3</td><td>ki_art_1__3</td><td>Other type of AI</td></tr> <tr><td>4</td><td>ki_art_1__4</td><td>Not specified</td></tr> </table>                                                                                                                                                                                                                                                                                                                                                                                                                                                                                                                                                                                                                                                                                                                                                                                                                                                                                                                                                                                                                                                                                                                                                                                                                                                                                                                                                                                                                                                                                                                                                                                                                                                                                                                                                                                                                                                                                                                                                                                                                                                                                                                                                                                                                                                                                                                                                                                                                                                                                                                                                                                                                                                                                                                       | 1 | ki_art_1__1          | Machine Learning                 | 2 | ki_art_1__2          | Deep Learning  | 3 | ki_art_1__3          | Other type of AI | 4 | ki_art_1__4          | Not specified         |   |                      |               |   |                      |              |   |                      |         |   |                      |                           |   |                      |                     |    |                       |             |    |                       |          |    |                       |                      |    |                       |                   |    |                       |            |    |                       |                                 |    |                       |                     |    |                       |                                           |    |                       |                                |    |                       |              |    |                       |           |    |                       |                  |    |                       |               |    |                       |           |    |                       |              |    |                       |                                      |    |                       |                                      |    |                       |            |    |                       |                           |    |                       |                |    |                       |           |    |                       |                   |    |                       |              |    |                       |                      |    |                       |         |    |                       |                                       |    |                       |                        |    |                       |               |
| 1  | ki_art_1__1                                                                          | Machine Learning                                                  |                                                                                                                                                                                                                                                                                                                                                                                                                                                                                                                                                                                                                                                                                                                                                                                                                                                                                                                                                                                                                                                                                                                                                                                                                                                                                                                                                                                                                                                                                                                                                                                                                                                                                                                                                                                                                                                                                                                                                                                                                                                                                                                                                                                                                                                                                                                                                                                                                                                                                                                                                                                                                                                                                                                                                                                                                                                                                                                                                                                                                             |   |                      |                                  |   |                      |                |   |                      |                  |   |                      |                       |   |                      |               |   |                      |              |   |                      |         |   |                      |                           |   |                      |                     |    |                       |             |    |                       |          |    |                       |                      |    |                       |                   |    |                       |            |    |                       |                                 |    |                       |                     |    |                       |                                           |    |                       |                                |    |                       |              |    |                       |           |    |                       |                  |    |                       |               |    |                       |           |    |                       |              |    |                       |                                      |    |                       |                                      |    |                       |            |    |                       |                           |    |                       |                |    |                       |           |    |                       |                   |    |                       |              |    |                       |                      |    |                       |         |    |                       |                                       |    |                       |                        |    |                       |               |
| 2  | ki_art_1__2                                                                          | Deep Learning                                                     |                                                                                                                                                                                                                                                                                                                                                                                                                                                                                                                                                                                                                                                                                                                                                                                                                                                                                                                                                                                                                                                                                                                                                                                                                                                                                                                                                                                                                                                                                                                                                                                                                                                                                                                                                                                                                                                                                                                                                                                                                                                                                                                                                                                                                                                                                                                                                                                                                                                                                                                                                                                                                                                                                                                                                                                                                                                                                                                                                                                                                             |   |                      |                                  |   |                      |                |   |                      |                  |   |                      |                       |   |                      |               |   |                      |              |   |                      |         |   |                      |                           |   |                      |                     |    |                       |             |    |                       |          |    |                       |                      |    |                       |                   |    |                       |            |    |                       |                                 |    |                       |                     |    |                       |                                           |    |                       |                                |    |                       |              |    |                       |           |    |                       |                  |    |                       |               |    |                       |           |    |                       |              |    |                       |                                      |    |                       |                                      |    |                       |            |    |                       |                           |    |                       |                |    |                       |           |    |                       |                   |    |                       |              |    |                       |                      |    |                       |         |    |                       |                                       |    |                       |                        |    |                       |               |
| 3  | ki_art_1__3                                                                          | Other type of AI                                                  |                                                                                                                                                                                                                                                                                                                                                                                                                                                                                                                                                                                                                                                                                                                                                                                                                                                                                                                                                                                                                                                                                                                                                                                                                                                                                                                                                                                                                                                                                                                                                                                                                                                                                                                                                                                                                                                                                                                                                                                                                                                                                                                                                                                                                                                                                                                                                                                                                                                                                                                                                                                                                                                                                                                                                                                                                                                                                                                                                                                                                             |   |                      |                                  |   |                      |                |   |                      |                  |   |                      |                       |   |                      |               |   |                      |              |   |                      |         |   |                      |                           |   |                      |                     |    |                       |             |    |                       |          |    |                       |                      |    |                       |                   |    |                       |            |    |                       |                                 |    |                       |                     |    |                       |                                           |    |                       |                                |    |                       |              |    |                       |           |    |                       |                  |    |                       |               |    |                       |           |    |                       |              |    |                       |                                      |    |                       |                                      |    |                       |            |    |                       |                           |    |                       |                |    |                       |           |    |                       |                   |    |                       |              |    |                       |                      |    |                       |         |    |                       |                                       |    |                       |                        |    |                       |               |
| 4  | ki_art_1__4                                                                          | Not specified                                                     |                                                                                                                                                                                                                                                                                                                                                                                                                                                                                                                                                                                                                                                                                                                                                                                                                                                                                                                                                                                                                                                                                                                                                                                                                                                                                                                                                                                                                                                                                                                                                                                                                                                                                                                                                                                                                                                                                                                                                                                                                                                                                                                                                                                                                                                                                                                                                                                                                                                                                                                                                                                                                                                                                                                                                                                                                                                                                                                                                                                                                             |   |                      |                                  |   |                      |                |   |                      |                  |   |                      |                       |   |                      |               |   |                      |              |   |                      |         |   |                      |                           |   |                      |                     |    |                       |             |    |                       |          |    |                       |                      |    |                       |                   |    |                       |            |    |                       |                                 |    |                       |                     |    |                       |                                           |    |                       |                                |    |                       |              |    |                       |           |    |                       |                  |    |                       |               |    |                       |           |    |                       |              |    |                       |                                      |    |                       |                                      |    |                       |            |    |                       |                           |    |                       |                |    |                       |           |    |                       |                   |    |                       |              |    |                       |                      |    |                       |         |    |                       |                                       |    |                       |                        |    |                       |               |

|    |                                                                           |                                                                      |                                                                                                                                                                                                                                                                                                                                                                                                                                                                                                                                                                                    |   |                                    |                             |                                                                       |                        |                                                               |   |                        |                                              |   |                        |                                           |   |                      |                        |   |                      |                        |   |                 |               |
|----|---------------------------------------------------------------------------|----------------------------------------------------------------------|------------------------------------------------------------------------------------------------------------------------------------------------------------------------------------------------------------------------------------------------------------------------------------------------------------------------------------------------------------------------------------------------------------------------------------------------------------------------------------------------------------------------------------------------------------------------------------|---|------------------------------------|-----------------------------|-----------------------------------------------------------------------|------------------------|---------------------------------------------------------------|---|------------------------|----------------------------------------------|---|------------------------|-------------------------------------------|---|----------------------|------------------------|---|----------------------|------------------------|---|-----------------|---------------|
| 60 | ki_art_ml_1<br>Show the field ONLY if:<br>[ki_art_1(1)] = '1'             | Please specify the type of Machine Learning (ML) you are developing: | checkbox<br><table border="1"> <tr><td>1</td><td>ki_art_ml_1__1</td><td>Supervised ML</td></tr> <tr><td>2</td><td>ki_art_ml_1__2</td><td>Semi-supervised ML</td></tr> <tr><td>3</td><td>ki_art_ml_1__3</td><td>Unsupervised ML</td></tr> <tr><td>4</td><td>ki_art_ml_1__4</td><td>Reinforcement learning</td></tr> <tr><td>5</td><td>ki_art_ml_1__5</td><td>Other</td></tr> <tr><td>6</td><td>ki_art_ml_1__6</td><td>Not specified</td></tr> </table>                                                                                                                              | 1 | ki_art_ml_1__1                     | Supervised ML               | 2                                                                     | ki_art_ml_1__2         | Semi-supervised ML                                            | 3 | ki_art_ml_1__3         | Unsupervised ML                              | 4 | ki_art_ml_1__4         | Reinforcement learning                    | 5 | ki_art_ml_1__5       | Other                  | 6 | ki_art_ml_1__6       | Not specified          |   |                 |               |
| 1  | ki_art_ml_1__1                                                            | Supervised ML                                                        |                                                                                                                                                                                                                                                                                                                                                                                                                                                                                                                                                                                    |   |                                    |                             |                                                                       |                        |                                                               |   |                        |                                              |   |                        |                                           |   |                      |                        |   |                      |                        |   |                 |               |
| 2  | ki_art_ml_1__2                                                            | Semi-supervised ML                                                   |                                                                                                                                                                                                                                                                                                                                                                                                                                                                                                                                                                                    |   |                                    |                             |                                                                       |                        |                                                               |   |                        |                                              |   |                        |                                           |   |                      |                        |   |                      |                        |   |                 |               |
| 3  | ki_art_ml_1__3                                                            | Unsupervised ML                                                      |                                                                                                                                                                                                                                                                                                                                                                                                                                                                                                                                                                                    |   |                                    |                             |                                                                       |                        |                                                               |   |                        |                                              |   |                        |                                           |   |                      |                        |   |                      |                        |   |                 |               |
| 4  | ki_art_ml_1__4                                                            | Reinforcement learning                                               |                                                                                                                                                                                                                                                                                                                                                                                                                                                                                                                                                                                    |   |                                    |                             |                                                                       |                        |                                                               |   |                        |                                              |   |                        |                                           |   |                      |                        |   |                      |                        |   |                 |               |
| 5  | ki_art_ml_1__5                                                            | Other                                                                |                                                                                                                                                                                                                                                                                                                                                                                                                                                                                                                                                                                    |   |                                    |                             |                                                                       |                        |                                                               |   |                        |                                              |   |                        |                                           |   |                      |                        |   |                      |                        |   |                 |               |
| 6  | ki_art_ml_1__6                                                            | Not specified                                                        |                                                                                                                                                                                                                                                                                                                                                                                                                                                                                                                                                                                    |   |                                    |                             |                                                                       |                        |                                                               |   |                        |                                              |   |                        |                                           |   |                      |                        |   |                      |                        |   |                 |               |
| 61 | ki_art_dl_1<br>Show the field ONLY if:<br>[ki_art_1(2)] = '1'             | Please specify the type of Deep Learning you are developing:         | checkbox<br><table border="1"> <tr><td>1</td><td>ki_art_dl_1__1</td><td>Convolutional Networks</td></tr> <tr><td>2</td><td>ki_art_dl_1__2</td><td>Recurrent neural Networks</td></tr> <tr><td>3</td><td>ki_art_dl_1__3</td><td>Autoencoders</td></tr> <tr><td>4</td><td>ki_art_dl_1__4</td><td>Other</td></tr> <tr><td>5</td><td>ki_art_dl_1__5</td><td>Not specified</td></tr> </table>                                                                                                                                                                                           | 1 | ki_art_dl_1__1                     | Convolutional Networks      | 2                                                                     | ki_art_dl_1__2         | Recurrent neural Networks                                     | 3 | ki_art_dl_1__3         | Autoencoders                                 | 4 | ki_art_dl_1__4         | Other                                     | 5 | ki_art_dl_1__5       | Not specified          |   |                      |                        |   |                 |               |
| 1  | ki_art_dl_1__1                                                            | Convolutional Networks                                               |                                                                                                                                                                                                                                                                                                                                                                                                                                                                                                                                                                                    |   |                                    |                             |                                                                       |                        |                                                               |   |                        |                                              |   |                        |                                           |   |                      |                        |   |                      |                        |   |                 |               |
| 2  | ki_art_dl_1__2                                                            | Recurrent neural Networks                                            |                                                                                                                                                                                                                                                                                                                                                                                                                                                                                                                                                                                    |   |                                    |                             |                                                                       |                        |                                                               |   |                        |                                              |   |                        |                                           |   |                      |                        |   |                      |                        |   |                 |               |
| 3  | ki_art_dl_1__3                                                            | Autoencoders                                                         |                                                                                                                                                                                                                                                                                                                                                                                                                                                                                                                                                                                    |   |                                    |                             |                                                                       |                        |                                                               |   |                        |                                              |   |                        |                                           |   |                      |                        |   |                      |                        |   |                 |               |
| 4  | ki_art_dl_1__4                                                            | Other                                                                |                                                                                                                                                                                                                                                                                                                                                                                                                                                                                                                                                                                    |   |                                    |                             |                                                                       |                        |                                                               |   |                        |                                              |   |                        |                                           |   |                      |                        |   |                      |                        |   |                 |               |
| 5  | ki_art_dl_1__5                                                            | Not specified                                                        |                                                                                                                                                                                                                                                                                                                                                                                                                                                                                                                                                                                    |   |                                    |                             |                                                                       |                        |                                                               |   |                        |                                              |   |                        |                                           |   |                      |                        |   |                      |                        |   |                 |               |
| 62 | ki_bereich_1                                                              | In which of the following areas of AI are you developing?            | checkbox<br><table border="1"> <tr><td>1</td><td>ki_bereich_1__1</td><td>Natural Language Processing</td></tr> <tr><td>2</td><td>ki_bereich_1__2</td><td>Clinical Decision Support</td></tr> <tr><td>3</td><td>ki_bereich_1__3</td><td>Image processing</td></tr> <tr><td>4</td><td>ki_bereich_1__4</td><td>Computer vision (e.g. object recognition)</td></tr> <tr><td>5</td><td>ki_bereich_1__5</td><td>Robotics</td></tr> <tr><td>6</td><td>ki_bereich_1__6</td><td>Other (please specify)</td></tr> <tr><td>7</td><td>ki_bereich_1__7</td><td>Not specified</td></tr> </table> | 1 | ki_bereich_1__1                    | Natural Language Processing | 2                                                                     | ki_bereich_1__2        | Clinical Decision Support                                     | 3 | ki_bereich_1__3        | Image processing                             | 4 | ki_bereich_1__4        | Computer vision (e.g. object recognition) | 5 | ki_bereich_1__5      | Robotics               | 6 | ki_bereich_1__6      | Other (please specify) | 7 | ki_bereich_1__7 | Not specified |
| 1  | ki_bereich_1__1                                                           | Natural Language Processing                                          |                                                                                                                                                                                                                                                                                                                                                                                                                                                                                                                                                                                    |   |                                    |                             |                                                                       |                        |                                                               |   |                        |                                              |   |                        |                                           |   |                      |                        |   |                      |                        |   |                 |               |
| 2  | ki_bereich_1__2                                                           | Clinical Decision Support                                            |                                                                                                                                                                                                                                                                                                                                                                                                                                                                                                                                                                                    |   |                                    |                             |                                                                       |                        |                                                               |   |                        |                                              |   |                        |                                           |   |                      |                        |   |                      |                        |   |                 |               |
| 3  | ki_bereich_1__3                                                           | Image processing                                                     |                                                                                                                                                                                                                                                                                                                                                                                                                                                                                                                                                                                    |   |                                    |                             |                                                                       |                        |                                                               |   |                        |                                              |   |                        |                                           |   |                      |                        |   |                      |                        |   |                 |               |
| 4  | ki_bereich_1__4                                                           | Computer vision (e.g. object recognition)                            |                                                                                                                                                                                                                                                                                                                                                                                                                                                                                                                                                                                    |   |                                    |                             |                                                                       |                        |                                                               |   |                        |                                              |   |                        |                                           |   |                      |                        |   |                      |                        |   |                 |               |
| 5  | ki_bereich_1__5                                                           | Robotics                                                             |                                                                                                                                                                                                                                                                                                                                                                                                                                                                                                                                                                                    |   |                                    |                             |                                                                       |                        |                                                               |   |                        |                                              |   |                        |                                           |   |                      |                        |   |                      |                        |   |                 |               |
| 6  | ki_bereich_1__6                                                           | Other (please specify)                                               |                                                                                                                                                                                                                                                                                                                                                                                                                                                                                                                                                                                    |   |                                    |                             |                                                                       |                        |                                                               |   |                        |                                              |   |                        |                                           |   |                      |                        |   |                      |                        |   |                 |               |
| 7  | ki_bereich_1__7                                                           | Not specified                                                        |                                                                                                                                                                                                                                                                                                                                                                                                                                                                                                                                                                                    |   |                                    |                             |                                                                       |                        |                                                               |   |                        |                                              |   |                        |                                           |   |                      |                        |   |                      |                        |   |                 |               |
| 63 | ki_bereich_andere_1<br>Show the field ONLY if:<br>[ki_bereich_1(6)] = '1' | Which other area of AI do your development efforts fall into:        | text                                                                                                                                                                                                                                                                                                                                                                                                                                                                                                                                                                               |   |                                    |                             |                                                                       |                        |                                                               |   |                        |                                              |   |                        |                                           |   |                      |                        |   |                      |                        |   |                 |               |
| 64 | bias_ki_1                                                                 | How familiar are you with biases in AI?                              | radio<br><table border="1"> <tr><td>1</td><td>I have never heard of biases in AI</td></tr> <tr><td>2</td><td>I have heard of biases in AI but I can not think of concrete examples</td></tr> <tr><td>3</td><td>I have heard of biases in AI and I do know specific use cases</td></tr> </table>                                                                                                                                                                                                                                                                                    | 1 | I have never heard of biases in AI | 2                           | I have heard of biases in AI but I can not think of concrete examples | 3                      | I have heard of biases in AI and I do know specific use cases |   |                        |                                              |   |                        |                                           |   |                      |                        |   |                      |                        |   |                 |               |
| 1  | I have never heard of biases in AI                                        |                                                                      |                                                                                                                                                                                                                                                                                                                                                                                                                                                                                                                                                                                    |   |                                    |                             |                                                                       |                        |                                                               |   |                        |                                              |   |                        |                                           |   |                      |                        |   |                      |                        |   |                 |               |
| 2  | I have heard of biases in AI but I can not think of concrete examples     |                                                                      |                                                                                                                                                                                                                                                                                                                                                                                                                                                                                                                                                                                    |   |                                    |                             |                                                                       |                        |                                                               |   |                        |                                              |   |                        |                                           |   |                      |                        |   |                      |                        |   |                 |               |
| 3  | I have heard of biases in AI and I do know specific use cases             |                                                                      |                                                                                                                                                                                                                                                                                                                                                                                                                                                                                                                                                                                    |   |                                    |                             |                                                                       |                        |                                                               |   |                        |                                              |   |                        |                                           |   |                      |                        |   |                      |                        |   |                 |               |
| 65 | bias_feld_1                                                               | Where do you think biases in AI can occur?                           | checkbox<br><table border="1"> <tr><td>1</td><td>bias_feld_1__1</td><td>Methodology of algorithms</td></tr> <tr><td>2</td><td>bias_feld_1__2</td><td>Societal factors</td></tr> <tr><td>3</td><td>bias_feld_1__3</td><td>Bias due to data validation or data security</td></tr> <tr><td>4</td><td>bias_feld_1__4</td><td>Not specified</td></tr> <tr><td>5</td><td>bias_feld_1__5</td><td>Other (please specify)</td></tr> <tr><td>6</td><td>bias_feld_1__6</td><td>None of the above</td></tr> </table>                                                                           | 1 | bias_feld_1__1                     | Methodology of algorithms   | 2                                                                     | bias_feld_1__2         | Societal factors                                              | 3 | bias_feld_1__3         | Bias due to data validation or data security | 4 | bias_feld_1__4         | Not specified                             | 5 | bias_feld_1__5       | Other (please specify) | 6 | bias_feld_1__6       | None of the above      |   |                 |               |
| 1  | bias_feld_1__1                                                            | Methodology of algorithms                                            |                                                                                                                                                                                                                                                                                                                                                                                                                                                                                                                                                                                    |   |                                    |                             |                                                                       |                        |                                                               |   |                        |                                              |   |                        |                                           |   |                      |                        |   |                      |                        |   |                 |               |
| 2  | bias_feld_1__2                                                            | Societal factors                                                     |                                                                                                                                                                                                                                                                                                                                                                                                                                                                                                                                                                                    |   |                                    |                             |                                                                       |                        |                                                               |   |                        |                                              |   |                        |                                           |   |                      |                        |   |                      |                        |   |                 |               |
| 3  | bias_feld_1__3                                                            | Bias due to data validation or data security                         |                                                                                                                                                                                                                                                                                                                                                                                                                                                                                                                                                                                    |   |                                    |                             |                                                                       |                        |                                                               |   |                        |                                              |   |                        |                                           |   |                      |                        |   |                      |                        |   |                 |               |
| 4  | bias_feld_1__4                                                            | Not specified                                                        |                                                                                                                                                                                                                                                                                                                                                                                                                                                                                                                                                                                    |   |                                    |                             |                                                                       |                        |                                                               |   |                        |                                              |   |                        |                                           |   |                      |                        |   |                      |                        |   |                 |               |
| 5  | bias_feld_1__5                                                            | Other (please specify)                                               |                                                                                                                                                                                                                                                                                                                                                                                                                                                                                                                                                                                    |   |                                    |                             |                                                                       |                        |                                                               |   |                        |                                              |   |                        |                                           |   |                      |                        |   |                      |                        |   |                 |               |
| 6  | bias_feld_1__6                                                            | None of the above                                                    |                                                                                                                                                                                                                                                                                                                                                                                                                                                                                                                                                                                    |   |                                    |                             |                                                                       |                        |                                                               |   |                        |                                              |   |                        |                                           |   |                      |                        |   |                      |                        |   |                 |               |
| 66 | bias_feld_andere_1<br>Show the field ONLY if:<br>[bias_feld_1(5)] = '1'   | Where else do you think biases in AI can occur?                      | text                                                                                                                                                                                                                                                                                                                                                                                                                                                                                                                                                                               |   |                                    |                             |                                                                       |                        |                                                               |   |                        |                                              |   |                        |                                           |   |                      |                        |   |                      |                        |   |                 |               |
| 67 | ki_trainingsdaten_1                                                       | What data do you use to train AI algorithms?                         | checkbox<br><table border="1"> <tr><td>1</td><td>ki_trainingsdaten_1__1</td><td>Image data</td></tr> <tr><td>2</td><td>ki_trainingsdaten_1__2</td><td>Audio data</td></tr> <tr><td>3</td><td>ki_trainingsdaten_1__3</td><td>Text data</td></tr> <tr><td>4</td><td>ki_trainingsdaten_1__4</td><td>Not specified</td></tr> </table>                                                                                                                                                                                                                                                  | 1 | ki_trainingsdaten_1__1             | Image data                  | 2                                                                     | ki_trainingsdaten_1__2 | Audio data                                                    | 3 | ki_trainingsdaten_1__3 | Text data                                    | 4 | ki_trainingsdaten_1__4 | Not specified                             |   |                      |                        |   |                      |                        |   |                 |               |
| 1  | ki_trainingsdaten_1__1                                                    | Image data                                                           |                                                                                                                                                                                                                                                                                                                                                                                                                                                                                                                                                                                    |   |                                    |                             |                                                                       |                        |                                                               |   |                        |                                              |   |                        |                                           |   |                      |                        |   |                      |                        |   |                 |               |
| 2  | ki_trainingsdaten_1__2                                                    | Audio data                                                           |                                                                                                                                                                                                                                                                                                                                                                                                                                                                                                                                                                                    |   |                                    |                             |                                                                       |                        |                                                               |   |                        |                                              |   |                        |                                           |   |                      |                        |   |                      |                        |   |                 |               |
| 3  | ki_trainingsdaten_1__3                                                    | Text data                                                            |                                                                                                                                                                                                                                                                                                                                                                                                                                                                                                                                                                                    |   |                                    |                             |                                                                       |                        |                                                               |   |                        |                                              |   |                        |                                           |   |                      |                        |   |                      |                        |   |                 |               |
| 4  | ki_trainingsdaten_1__4                                                    | Not specified                                                        |                                                                                                                                                                                                                                                                                                                                                                                                                                                                                                                                                                                    |   |                                    |                             |                                                                       |                        |                                                               |   |                        |                                              |   |                        |                                           |   |                      |                        |   |                      |                        |   |                 |               |
| 68 | ki_daten_quelle_1                                                         | What is the origin of your data?                                     | checkbox<br><table border="1"> <tr><td>1</td><td>ki_daten_quelle_1__1</td><td>Wearables</td></tr> <tr><td>2</td><td>ki_daten_quelle_1__2</td><td>Registries</td></tr> <tr><td>3</td><td>ki_daten_quelle_1__3</td><td>Database from one center</td></tr> <tr><td>4</td><td>ki_daten_quelle_1__4</td><td>Multi-center database</td></tr> <tr><td>5</td><td>ki_daten_quelle_1__5</td><td>Other (please specify)</td></tr> <tr><td>6</td><td>ki_daten_quelle_1__6</td><td>Not specified</td></tr> </table>                                                                             | 1 | ki_daten_quelle_1__1               | Wearables                   | 2                                                                     | ki_daten_quelle_1__2   | Registries                                                    | 3 | ki_daten_quelle_1__3   | Database from one center                     | 4 | ki_daten_quelle_1__4   | Multi-center database                     | 5 | ki_daten_quelle_1__5 | Other (please specify) | 6 | ki_daten_quelle_1__6 | Not specified          |   |                 |               |
| 1  | ki_daten_quelle_1__1                                                      | Wearables                                                            |                                                                                                                                                                                                                                                                                                                                                                                                                                                                                                                                                                                    |   |                                    |                             |                                                                       |                        |                                                               |   |                        |                                              |   |                        |                                           |   |                      |                        |   |                      |                        |   |                 |               |
| 2  | ki_daten_quelle_1__2                                                      | Registries                                                           |                                                                                                                                                                                                                                                                                                                                                                                                                                                                                                                                                                                    |   |                                    |                             |                                                                       |                        |                                                               |   |                        |                                              |   |                        |                                           |   |                      |                        |   |                      |                        |   |                 |               |
| 3  | ki_daten_quelle_1__3                                                      | Database from one center                                             |                                                                                                                                                                                                                                                                                                                                                                                                                                                                                                                                                                                    |   |                                    |                             |                                                                       |                        |                                                               |   |                        |                                              |   |                        |                                           |   |                      |                        |   |                      |                        |   |                 |               |
| 4  | ki_daten_quelle_1__4                                                      | Multi-center database                                                |                                                                                                                                                                                                                                                                                                                                                                                                                                                                                                                                                                                    |   |                                    |                             |                                                                       |                        |                                                               |   |                        |                                              |   |                        |                                           |   |                      |                        |   |                      |                        |   |                 |               |
| 5  | ki_daten_quelle_1__5                                                      | Other (please specify)                                               |                                                                                                                                                                                                                                                                                                                                                                                                                                                                                                                                                                                    |   |                                    |                             |                                                                       |                        |                                                               |   |                        |                                              |   |                        |                                           |   |                      |                        |   |                      |                        |   |                 |               |
| 6  | ki_daten_quelle_1__6                                                      | Not specified                                                        |                                                                                                                                                                                                                                                                                                                                                                                                                                                                                                                                                                                    |   |                                    |                             |                                                                       |                        |                                                               |   |                        |                                              |   |                        |                                           |   |                      |                        |   |                      |                        |   |                 |               |

|    |                                                                                                                                                                                                                         |                                                                                                                                                                      |                                                                                                                                                                                                                                                                                                                                                                                                                                                                                                                                                                                                 |   |                          |                                                  |                    |                          |                                         |   |                          |                      |           |                          |                                    |   |                      |                           |   |                      |                        |   |                     |               |
|----|-------------------------------------------------------------------------------------------------------------------------------------------------------------------------------------------------------------------------|----------------------------------------------------------------------------------------------------------------------------------------------------------------------|-------------------------------------------------------------------------------------------------------------------------------------------------------------------------------------------------------------------------------------------------------------------------------------------------------------------------------------------------------------------------------------------------------------------------------------------------------------------------------------------------------------------------------------------------------------------------------------------------|---|--------------------------|--------------------------------------------------|--------------------|--------------------------|-----------------------------------------|---|--------------------------|----------------------|-----------|--------------------------|------------------------------------|---|----------------------|---------------------------|---|----------------------|------------------------|---|---------------------|---------------|
| 69 | ki_daten_quelle_andere_1<br>Show the field ONLY if:<br>[ki_daten_quelle_1(5)] = '1'                                                                                                                                     | Please specify the origin of your data:                                                                                                                              | text                                                                                                                                                                                                                                                                                                                                                                                                                                                                                                                                                                                            |   |                          |                                                  |                    |                          |                                         |   |                          |                      |           |                          |                                    |   |                      |                           |   |                      |                        |   |                     |               |
| 70 | nat_internat_daten_1                                                                                                                                                                                                    | Do you work with national or international data?                                                                                                                     | radio<br><table border="1"> <tr><td>1</td><td>National data</td></tr> <tr><td>2</td><td>International data</td></tr> <tr><td>3</td><td>National and international data</td></tr> <tr><td>4</td><td>Not specified</td></tr> </table>                                                                                                                                                                                                                                                                                                                                                             | 1 | National data            | 2                                                | International data | 3                        | National and international data         | 4 | Not specified            |                      |           |                          |                                    |   |                      |                           |   |                      |                        |   |                     |               |
| 1  | National data                                                                                                                                                                                                           |                                                                                                                                                                      |                                                                                                                                                                                                                                                                                                                                                                                                                                                                                                                                                                                                 |   |                          |                                                  |                    |                          |                                         |   |                          |                      |           |                          |                                    |   |                      |                           |   |                      |                        |   |                     |               |
| 2  | International data                                                                                                                                                                                                      |                                                                                                                                                                      |                                                                                                                                                                                                                                                                                                                                                                                                                                                                                                                                                                                                 |   |                          |                                                  |                    |                          |                                         |   |                          |                      |           |                          |                                    |   |                      |                           |   |                      |                        |   |                     |               |
| 3  | National and international data                                                                                                                                                                                         |                                                                                                                                                                      |                                                                                                                                                                                                                                                                                                                                                                                                                                                                                                                                                                                                 |   |                          |                                                  |                    |                          |                                         |   |                          |                      |           |                          |                                    |   |                      |                           |   |                      |                        |   |                     |               |
| 4  | Not specified                                                                                                                                                                                                           |                                                                                                                                                                      |                                                                                                                                                                                                                                                                                                                                                                                                                                                                                                                                                                                                 |   |                          |                                                  |                    |                          |                                         |   |                          |                      |           |                          |                                    |   |                      |                           |   |                      |                        |   |                     |               |
| 71 | standard_daten_1                                                                                                                                                                                                        | Do you think that using standardized data (international semantic and syntactic standards such as HL7 FHIR, SNOMED CT) when training AI algorithms can prevent bias? | radio<br><table border="1"> <tr><td>1</td><td>Yes</td></tr> <tr><td>2</td><td>No</td></tr> <tr><td>3</td><td>Not specified</td></tr> </table>                                                                                                                                                                                                                                                                                                                                                                                                                                                   | 1 | Yes                      | 2                                                | No                 | 3                        | Not specified                           |   |                          |                      |           |                          |                                    |   |                      |                           |   |                      |                        |   |                     |               |
| 1  | Yes                                                                                                                                                                                                                     |                                                                                                                                                                      |                                                                                                                                                                                                                                                                                                                                                                                                                                                                                                                                                                                                 |   |                          |                                                  |                    |                          |                                         |   |                          |                      |           |                          |                                    |   |                      |                           |   |                      |                        |   |                     |               |
| 2  | No                                                                                                                                                                                                                      |                                                                                                                                                                      |                                                                                                                                                                                                                                                                                                                                                                                                                                                                                                                                                                                                 |   |                          |                                                  |                    |                          |                                         |   |                          |                      |           |                          |                                    |   |                      |                           |   |                      |                        |   |                     |               |
| 3  | Not specified                                                                                                                                                                                                           |                                                                                                                                                                      |                                                                                                                                                                                                                                                                                                                                                                                                                                                                                                                                                                                                 |   |                          |                                                  |                    |                          |                                         |   |                          |                      |           |                          |                                    |   |                      |                           |   |                      |                        |   |                     |               |
| 72 | massnahmen_bias_1                                                                                                                                                                                                       | Do you know any of the following preventive measures to avoid bias in AI applications?                                                                               | checkbox<br><table border="1"> <tr><td>1</td><td>massnahmen_bias_1__1</td><td>Employ Explainable Artificial Intelligence (XAI)</td></tr> <tr><td>2</td><td>massnahmen_bias_1__2</td><td>Collecting sociodemographic data points</td></tr> <tr><td>3</td><td>massnahmen_bias_1__3</td><td>Statistical analysis</td></tr> <tr><td>4</td><td>massnahmen_bias_1__4</td><td>Software evaluating fairness in AI</td></tr> <tr><td>5</td><td>massnahmen_bias_1__5</td><td>I do not know any of them</td></tr> <tr><td>6</td><td>massnahmen_bias_1__6</td><td>Other (please specify)</td></tr> </table> | 1 | massnahmen_bias_1__1     | Employ Explainable Artificial Intelligence (XAI) | 2                  | massnahmen_bias_1__2     | Collecting sociodemographic data points | 3 | massnahmen_bias_1__3     | Statistical analysis | 4         | massnahmen_bias_1__4     | Software evaluating fairness in AI | 5 | massnahmen_bias_1__5 | I do not know any of them | 6 | massnahmen_bias_1__6 | Other (please specify) |   |                     |               |
| 1  | massnahmen_bias_1__1                                                                                                                                                                                                    | Employ Explainable Artificial Intelligence (XAI)                                                                                                                     |                                                                                                                                                                                                                                                                                                                                                                                                                                                                                                                                                                                                 |   |                          |                                                  |                    |                          |                                         |   |                          |                      |           |                          |                                    |   |                      |                           |   |                      |                        |   |                     |               |
| 2  | massnahmen_bias_1__2                                                                                                                                                                                                    | Collecting sociodemographic data points                                                                                                                              |                                                                                                                                                                                                                                                                                                                                                                                                                                                                                                                                                                                                 |   |                          |                                                  |                    |                          |                                         |   |                          |                      |           |                          |                                    |   |                      |                           |   |                      |                        |   |                     |               |
| 3  | massnahmen_bias_1__3                                                                                                                                                                                                    | Statistical analysis                                                                                                                                                 |                                                                                                                                                                                                                                                                                                                                                                                                                                                                                                                                                                                                 |   |                          |                                                  |                    |                          |                                         |   |                          |                      |           |                          |                                    |   |                      |                           |   |                      |                        |   |                     |               |
| 4  | massnahmen_bias_1__4                                                                                                                                                                                                    | Software evaluating fairness in AI                                                                                                                                   |                                                                                                                                                                                                                                                                                                                                                                                                                                                                                                                                                                                                 |   |                          |                                                  |                    |                          |                                         |   |                          |                      |           |                          |                                    |   |                      |                           |   |                      |                        |   |                     |               |
| 5  | massnahmen_bias_1__5                                                                                                                                                                                                    | I do not know any of them                                                                                                                                            |                                                                                                                                                                                                                                                                                                                                                                                                                                                                                                                                                                                                 |   |                          |                                                  |                    |                          |                                         |   |                          |                      |           |                          |                                    |   |                      |                           |   |                      |                        |   |                     |               |
| 6  | massnahmen_bias_1__6                                                                                                                                                                                                    | Other (please specify)                                                                                                                                               |                                                                                                                                                                                                                                                                                                                                                                                                                                                                                                                                                                                                 |   |                          |                                                  |                    |                          |                                         |   |                          |                      |           |                          |                                    |   |                      |                           |   |                      |                        |   |                     |               |
| 73 | massnahmen_bias_andere_1<br>Show the field ONLY if:<br>[massnahmen_bias_1(6)] = '1'                                                                                                                                     | Please specify the other preventive measure(s) you know to avoid bias in AI applications:                                                                            | text                                                                                                                                                                                                                                                                                                                                                                                                                                                                                                                                                                                            |   |                          |                                                  |                    |                          |                                         |   |                          |                      |           |                          |                                    |   |                      |                           |   |                      |                        |   |                     |               |
| 74 | soziodem_daten_1                                                                                                                                                                                                        | What sociodemographic data would you collect to prevent biases in AI?                                                                                                | checkbox<br><table border="1"> <tr><td>1</td><td>soziodem_daten_1__1</td><td>Biological gender</td></tr> <tr><td>2</td><td>soziodem_daten_1__2</td><td>Social gender</td></tr> <tr><td>3</td><td>soziodem_daten_1__3</td><td>Age</td></tr> <tr><td>4</td><td>soziodem_daten_1__4</td><td>Origin</td></tr> <tr><td>5</td><td>soziodem_daten_1__5</td><td>Other (please specify)</td></tr> <tr><td>6</td><td>soziodem_daten_1__6</td><td>None</td></tr> <tr><td>7</td><td>soziodem_daten_1__7</td><td>Not specified</td></tr> </table>                                                            | 1 | soziodem_daten_1__1      | Biological gender                                | 2                  | soziodem_daten_1__2      | Social gender                           | 3 | soziodem_daten_1__3      | Age                  | 4         | soziodem_daten_1__4      | Origin                             | 5 | soziodem_daten_1__5  | Other (please specify)    | 6 | soziodem_daten_1__6  | None                   | 7 | soziodem_daten_1__7 | Not specified |
| 1  | soziodem_daten_1__1                                                                                                                                                                                                     | Biological gender                                                                                                                                                    |                                                                                                                                                                                                                                                                                                                                                                                                                                                                                                                                                                                                 |   |                          |                                                  |                    |                          |                                         |   |                          |                      |           |                          |                                    |   |                      |                           |   |                      |                        |   |                     |               |
| 2  | soziodem_daten_1__2                                                                                                                                                                                                     | Social gender                                                                                                                                                        |                                                                                                                                                                                                                                                                                                                                                                                                                                                                                                                                                                                                 |   |                          |                                                  |                    |                          |                                         |   |                          |                      |           |                          |                                    |   |                      |                           |   |                      |                        |   |                     |               |
| 3  | soziodem_daten_1__3                                                                                                                                                                                                     | Age                                                                                                                                                                  |                                                                                                                                                                                                                                                                                                                                                                                                                                                                                                                                                                                                 |   |                          |                                                  |                    |                          |                                         |   |                          |                      |           |                          |                                    |   |                      |                           |   |                      |                        |   |                     |               |
| 4  | soziodem_daten_1__4                                                                                                                                                                                                     | Origin                                                                                                                                                               |                                                                                                                                                                                                                                                                                                                                                                                                                                                                                                                                                                                                 |   |                          |                                                  |                    |                          |                                         |   |                          |                      |           |                          |                                    |   |                      |                           |   |                      |                        |   |                     |               |
| 5  | soziodem_daten_1__5                                                                                                                                                                                                     | Other (please specify)                                                                                                                                               |                                                                                                                                                                                                                                                                                                                                                                                                                                                                                                                                                                                                 |   |                          |                                                  |                    |                          |                                         |   |                          |                      |           |                          |                                    |   |                      |                           |   |                      |                        |   |                     |               |
| 6  | soziodem_daten_1__6                                                                                                                                                                                                     | None                                                                                                                                                                 |                                                                                                                                                                                                                                                                                                                                                                                                                                                                                                                                                                                                 |   |                          |                                                  |                    |                          |                                         |   |                          |                      |           |                          |                                    |   |                      |                           |   |                      |                        |   |                     |               |
| 7  | soziodem_daten_1__7                                                                                                                                                                                                     | Not specified                                                                                                                                                        |                                                                                                                                                                                                                                                                                                                                                                                                                                                                                                                                                                                                 |   |                          |                                                  |                    |                          |                                         |   |                          |                      |           |                          |                                    |   |                      |                           |   |                      |                        |   |                     |               |
| 75 | soziodem_daten_andere_1<br>Show the field ONLY if:<br>[soziodem_daten_1(5)] = '1'                                                                                                                                       | What other sociodemographic data would you collect to prevent biases in AI?                                                                                          | text                                                                                                                                                                                                                                                                                                                                                                                                                                                                                                                                                                                            |   |                          |                                                  |                    |                          |                                         |   |                          |                      |           |                          |                                    |   |                      |                           |   |                      |                        |   |                     |               |
| 76 | soziodem_verwendung_1<br>Show the field ONLY if:<br>[soziodem_daten_1(1)] = '1' or<br>[soziodem_daten_1(2)] = '1' or<br>[soziodem_daten_1(3)] = '1' or<br>[soziodem_daten_1(4)] = '1' or<br>[soziodem_daten_1(5)] = '1' | What would you use the collected sociodemographic data for?                                                                                                          | checkbox<br><table border="1"> <tr><td>1</td><td>soziodem_verwendung_1__1</td><td>AI modelling</td></tr> <tr><td>2</td><td>soziodem_verwendung_1__2</td><td>Analysis</td></tr> <tr><td>3</td><td>soziodem_verwendung_1__3</td><td>Data acquisition</td></tr> <tr><td>4</td><td>soziodem_verwendung_1__4</td><td>Not specified</td></tr> </table>                                                                                                                                                                                                                                                | 1 | soziodem_verwendung_1__1 | AI modelling                                     | 2                  | soziodem_verwendung_1__2 | Analysis                                | 3 | soziodem_verwendung_1__3 | Data acquisition     | 4         | soziodem_verwendung_1__4 | Not specified                      |   |                      |                           |   |                      |                        |   |                     |               |
| 1  | soziodem_verwendung_1__1                                                                                                                                                                                                | AI modelling                                                                                                                                                         |                                                                                                                                                                                                                                                                                                                                                                                                                                                                                                                                                                                                 |   |                          |                                                  |                    |                          |                                         |   |                          |                      |           |                          |                                    |   |                      |                           |   |                      |                        |   |                     |               |
| 2  | soziodem_verwendung_1__2                                                                                                                                                                                                | Analysis                                                                                                                                                             |                                                                                                                                                                                                                                                                                                                                                                                                                                                                                                                                                                                                 |   |                          |                                                  |                    |                          |                                         |   |                          |                      |           |                          |                                    |   |                      |                           |   |                      |                        |   |                     |               |
| 3  | soziodem_verwendung_1__3                                                                                                                                                                                                | Data acquisition                                                                                                                                                     |                                                                                                                                                                                                                                                                                                                                                                                                                                                                                                                                                                                                 |   |                          |                                                  |                    |                          |                                         |   |                          |                      |           |                          |                                    |   |                      |                           |   |                      |                        |   |                     |               |
| 4  | soziodem_verwendung_1__4                                                                                                                                                                                                | Not specified                                                                                                                                                        |                                                                                                                                                                                                                                                                                                                                                                                                                                                                                                                                                                                                 |   |                          |                                                  |                    |                          |                                         |   |                          |                      |           |                          |                                    |   |                      |                           |   |                      |                        |   |                     |               |
| 77 | fairness_ki_1                                                                                                                                                                                                           | How would you rate the level of fairness of AI in your AI development? (Are specific groups of people treated /considered differently from others?)                  | radio<br><table border="1"> <tr><td>1</td><td>Not fair at all</td></tr> <tr><td>2</td><td>Barely fair</td></tr> <tr><td>3</td><td>Moderately fair</td></tr> <tr><td>4</td><td>Fair</td></tr> <tr><td>5</td><td>Very fair</td></tr> <tr><td>6</td><td>Not specified</td></tr> </table>                                                                                                                                                                                                                                                                                                           | 1 | Not fair at all          | 2                                                | Barely fair        | 3                        | Moderately fair                         | 4 | Fair                     | 5                    | Very fair | 6                        | Not specified                      |   |                      |                           |   |                      |                        |   |                     |               |
| 1  | Not fair at all                                                                                                                                                                                                         |                                                                                                                                                                      |                                                                                                                                                                                                                                                                                                                                                                                                                                                                                                                                                                                                 |   |                          |                                                  |                    |                          |                                         |   |                          |                      |           |                          |                                    |   |                      |                           |   |                      |                        |   |                     |               |
| 2  | Barely fair                                                                                                                                                                                                             |                                                                                                                                                                      |                                                                                                                                                                                                                                                                                                                                                                                                                                                                                                                                                                                                 |   |                          |                                                  |                    |                          |                                         |   |                          |                      |           |                          |                                    |   |                      |                           |   |                      |                        |   |                     |               |
| 3  | Moderately fair                                                                                                                                                                                                         |                                                                                                                                                                      |                                                                                                                                                                                                                                                                                                                                                                                                                                                                                                                                                                                                 |   |                          |                                                  |                    |                          |                                         |   |                          |                      |           |                          |                                    |   |                      |                           |   |                      |                        |   |                     |               |
| 4  | Fair                                                                                                                                                                                                                    |                                                                                                                                                                      |                                                                                                                                                                                                                                                                                                                                                                                                                                                                                                                                                                                                 |   |                          |                                                  |                    |                          |                                         |   |                          |                      |           |                          |                                    |   |                      |                           |   |                      |                        |   |                     |               |
| 5  | Very fair                                                                                                                                                                                                               |                                                                                                                                                                      |                                                                                                                                                                                                                                                                                                                                                                                                                                                                                                                                                                                                 |   |                          |                                                  |                    |                          |                                         |   |                          |                      |           |                          |                                    |   |                      |                           |   |                      |                        |   |                     |               |
| 6  | Not specified                                                                                                                                                                                                           |                                                                                                                                                                      |                                                                                                                                                                                                                                                                                                                                                                                                                                                                                                                                                                                                 |   |                          |                                                  |                    |                          |                                         |   |                          |                      |           |                          |                                    |   |                      |                           |   |                      |                        |   |                     |               |

|    |                                                                                                                                                                                 |                                                                               |                                                                                                                                                                                                                                                                                                                                                                                                                                                                                                                                                                                                                                                                                                                                                                                                                                                                                                                                                                                                                                                                                                                                                                                                                                                                                                                                            |   |                        |                   |            |                        |                                            |   |                        |                   |   |                        |                   |   |                        |                                               |   |                        |                        |   |                        |               |
|----|---------------------------------------------------------------------------------------------------------------------------------------------------------------------------------|-------------------------------------------------------------------------------|--------------------------------------------------------------------------------------------------------------------------------------------------------------------------------------------------------------------------------------------------------------------------------------------------------------------------------------------------------------------------------------------------------------------------------------------------------------------------------------------------------------------------------------------------------------------------------------------------------------------------------------------------------------------------------------------------------------------------------------------------------------------------------------------------------------------------------------------------------------------------------------------------------------------------------------------------------------------------------------------------------------------------------------------------------------------------------------------------------------------------------------------------------------------------------------------------------------------------------------------------------------------------------------------------------------------------------------------|---|------------------------|-------------------|------------|------------------------|--------------------------------------------|---|------------------------|-------------------|---|------------------------|-------------------|---|------------------------|-----------------------------------------------|---|------------------------|------------------------|---|------------------------|---------------|
| 78 | fairness_ki_block_1<br><br>Show the field ONLY if:<br>[fairness_ki_1] = '1' or [fairness_ki_1] = '2' or [fairness_ki_1] = '3' or [fairness_ki_1] = '4' or [fairness_ki_1] = '6' | What do you think is preventing fair AI in your use case?                     | checkbox<br><table border="1"> <tr> <td data-bbox="1021 114 1050 147">1</td> <td data-bbox="1050 114 1265 147">fairness_ki_block_1__1</td> <td data-bbox="1265 114 1513 147">Lack of resources</td> </tr> <tr> <td data-bbox="1021 147 1050 181">2</td> <td data-bbox="1050 147 1265 181">fairness_ki_block_1__2</td> <td data-bbox="1265 147 1513 181">Lack of support from superiors/institution</td> </tr> <tr> <td data-bbox="1021 181 1050 215">3</td> <td data-bbox="1050 181 1265 215">fairness_ki_block_1__3</td> <td data-bbox="1265 181 1513 215">Lack of knowledge</td> </tr> <tr> <td data-bbox="1021 215 1050 248">4</td> <td data-bbox="1050 215 1265 248">fairness_ki_block_1__4</td> <td data-bbox="1265 215 1513 248">Lack of fair data</td> </tr> <tr> <td data-bbox="1021 248 1050 371">5</td> <td data-bbox="1050 248 1265 371">fairness_ki_block_1__5</td> <td data-bbox="1265 248 1513 371">Lack of guidelines/recommendation for fair AI</td> </tr> <tr> <td data-bbox="1021 371 1050 405">6</td> <td data-bbox="1050 371 1265 405">fairness_ki_block_1__6</td> <td data-bbox="1265 371 1513 405">Other (please specify)</td> </tr> <tr> <td data-bbox="1021 405 1050 439">7</td> <td data-bbox="1050 405 1265 439">fairness_ki_block_1__7</td> <td data-bbox="1265 405 1513 439">Not specified</td> </tr> </table> | 1 | fairness_ki_block_1__1 | Lack of resources | 2          | fairness_ki_block_1__2 | Lack of support from superiors/institution | 3 | fairness_ki_block_1__3 | Lack of knowledge | 4 | fairness_ki_block_1__4 | Lack of fair data | 5 | fairness_ki_block_1__5 | Lack of guidelines/recommendation for fair AI | 6 | fairness_ki_block_1__6 | Other (please specify) | 7 | fairness_ki_block_1__7 | Not specified |
| 1  | fairness_ki_block_1__1                                                                                                                                                          | Lack of resources                                                             |                                                                                                                                                                                                                                                                                                                                                                                                                                                                                                                                                                                                                                                                                                                                                                                                                                                                                                                                                                                                                                                                                                                                                                                                                                                                                                                                            |   |                        |                   |            |                        |                                            |   |                        |                   |   |                        |                   |   |                        |                                               |   |                        |                        |   |                        |               |
| 2  | fairness_ki_block_1__2                                                                                                                                                          | Lack of support from superiors/institution                                    |                                                                                                                                                                                                                                                                                                                                                                                                                                                                                                                                                                                                                                                                                                                                                                                                                                                                                                                                                                                                                                                                                                                                                                                                                                                                                                                                            |   |                        |                   |            |                        |                                            |   |                        |                   |   |                        |                   |   |                        |                                               |   |                        |                        |   |                        |               |
| 3  | fairness_ki_block_1__3                                                                                                                                                          | Lack of knowledge                                                             |                                                                                                                                                                                                                                                                                                                                                                                                                                                                                                                                                                                                                                                                                                                                                                                                                                                                                                                                                                                                                                                                                                                                                                                                                                                                                                                                            |   |                        |                   |            |                        |                                            |   |                        |                   |   |                        |                   |   |                        |                                               |   |                        |                        |   |                        |               |
| 4  | fairness_ki_block_1__4                                                                                                                                                          | Lack of fair data                                                             |                                                                                                                                                                                                                                                                                                                                                                                                                                                                                                                                                                                                                                                                                                                                                                                                                                                                                                                                                                                                                                                                                                                                                                                                                                                                                                                                            |   |                        |                   |            |                        |                                            |   |                        |                   |   |                        |                   |   |                        |                                               |   |                        |                        |   |                        |               |
| 5  | fairness_ki_block_1__5                                                                                                                                                          | Lack of guidelines/recommendation for fair AI                                 |                                                                                                                                                                                                                                                                                                                                                                                                                                                                                                                                                                                                                                                                                                                                                                                                                                                                                                                                                                                                                                                                                                                                                                                                                                                                                                                                            |   |                        |                   |            |                        |                                            |   |                        |                   |   |                        |                   |   |                        |                                               |   |                        |                        |   |                        |               |
| 6  | fairness_ki_block_1__6                                                                                                                                                          | Other (please specify)                                                        |                                                                                                                                                                                                                                                                                                                                                                                                                                                                                                                                                                                                                                                                                                                                                                                                                                                                                                                                                                                                                                                                                                                                                                                                                                                                                                                                            |   |                        |                   |            |                        |                                            |   |                        |                   |   |                        |                   |   |                        |                                               |   |                        |                        |   |                        |               |
| 7  | fairness_ki_block_1__7                                                                                                                                                          | Not specified                                                                 |                                                                                                                                                                                                                                                                                                                                                                                                                                                                                                                                                                                                                                                                                                                                                                                                                                                                                                                                                                                                                                                                                                                                                                                                                                                                                                                                            |   |                        |                   |            |                        |                                            |   |                        |                   |   |                        |                   |   |                        |                                               |   |                        |                        |   |                        |               |
| 79 | fairness_ki_block_andere_1<br><br>Show the field ONLY if:<br>[fairness_ki_block_1(6)] = '1'                                                                                     | What other factor(s) do you think is/are preventing fair AI in your use case? | text                                                                                                                                                                                                                                                                                                                                                                                                                                                                                                                                                                                                                                                                                                                                                                                                                                                                                                                                                                                                                                                                                                                                                                                                                                                                                                                                       |   |                        |                   |            |                        |                                            |   |                        |                   |   |                        |                   |   |                        |                                               |   |                        |                        |   |                        |               |
| 80 | kommentar_3                                                                                                                                                                     | Do you have any comments you want to provide about the questionnaire?         | notes                                                                                                                                                                                                                                                                                                                                                                                                                                                                                                                                                                                                                                                                                                                                                                                                                                                                                                                                                                                                                                                                                                                                                                                                                                                                                                                                      |   |                        |                   |            |                        |                                            |   |                        |                   |   |                        |                   |   |                        |                                               |   |                        |                        |   |                        |               |
| 81 | questionnaire_fairness_and_ai_2_complete                                                                                                                                        | Section Header: <i>Form Status</i><br>Complete?                               | dropdown<br><table border="1"> <tr> <td data-bbox="1021 663 1050 696">0</td> <td data-bbox="1050 663 1163 696">Incomplete</td> </tr> <tr> <td data-bbox="1021 696 1050 730">1</td> <td data-bbox="1050 696 1163 730">Unverified</td> </tr> <tr> <td data-bbox="1021 730 1050 763">2</td> <td data-bbox="1050 730 1163 763">Complete</td> </tr> </table>                                                                                                                                                                                                                                                                                                                                                                                                                                                                                                                                                                                                                                                                                                                                                                                                                                                                                                                                                                                    | 0 | Incomplete             | 1                 | Unverified | 2                      | Complete                                   |   |                        |                   |   |                        |                   |   |                        |                                               |   |                        |                        |   |                        |               |
| 0  | Incomplete                                                                                                                                                                      |                                                                               |                                                                                                                                                                                                                                                                                                                                                                                                                                                                                                                                                                                                                                                                                                                                                                                                                                                                                                                                                                                                                                                                                                                                                                                                                                                                                                                                            |   |                        |                   |            |                        |                                            |   |                        |                   |   |                        |                   |   |                        |                                               |   |                        |                        |   |                        |               |
| 1  | Unverified                                                                                                                                                                      |                                                                               |                                                                                                                                                                                                                                                                                                                                                                                                                                                                                                                                                                                                                                                                                                                                                                                                                                                                                                                                                                                                                                                                                                                                                                                                                                                                                                                                            |   |                        |                   |            |                        |                                            |   |                        |                   |   |                        |                   |   |                        |                                               |   |                        |                        |   |                        |               |
| 2  | Complete                                                                                                                                                                        |                                                                               |                                                                                                                                                                                                                                                                                                                                                                                                                                                                                                                                                                                                                                                                                                                                                                                                                                                                                                                                                                                                                                                                                                                                                                                                                                                                                                                                            |   |                        |                   |            |                        |                                            |   |                        |                   |   |                        |                   |   |                        |                                               |   |                        |                        |   |                        |               |
